# Supplementary material
Source: publisher figshare collection journal article supplement (https://acs.figshare.com/ndownloader/files/25923039)
Supplement: Supplementary file 1 [file 25923039]

## Supporting Information

### **Isotope Effect in the Activation of a Mechanophore**

*Robert Nixon and Guillaume De Bo\**

*Department of Chemistry, University of Manchester, Oxford Road, Manchester, M13 9PL, UK*

\*E-mail: [guillaume.debo@manchester.ac.uk](mailto:guillaume.debo@manchester.ac.uk)

## 1 Table of Contents

|       |                                                                                                     |    |
|-------|-----------------------------------------------------------------------------------------------------|----|
| 1     | Table of Contents .....                                                                             | 2  |
| 2     | General Experimental Details.....                                                                   | 3  |
| 3     | Synthesis of mechanophores and reference compounds .....                                            | 4  |
| 3.1   | Synthetic Route to <b>S5</b> .....                                                                  | 4  |
| 3.1.1 | Synthesis of <b>S3</b> .....                                                                        | 4  |
| 3.1.2 | Synthesis of <b>S4</b> .....                                                                        | 5  |
| 3.1.3 | Synthesis of <b>S5</b> .....                                                                        | 5  |
| 3.2   | Synthetic Route to <b>S9</b> .....                                                                  | 6  |
| 3.2.1 | Synthesis of <b>S6</b> .....                                                                        | 6  |
| 3.2.2 | Synthesis of <b>S7</b> .....                                                                        | 7  |
| 3.2.3 | Synthesis of <b>S8</b> .....                                                                        | 7  |
| 3.2.4 | Synthesis of <b>S9</b> .....                                                                        | 8  |
| 4     | Synthesis of Polymers: .....                                                                        | 9  |
| 4.1   | Representative procedure: synthesis of <b>1<sub>Db</sub></b> .....                                  | 9  |
| 4.2   | List of polymers.....                                                                               | 9  |
| 5     | NMR Spectra .....                                                                                   | 11 |
| 5.1   | Spectra of <b>S3</b> .....                                                                          | 11 |
| 5.2   | Spectra of <b>S4</b> .....                                                                          | 13 |
| 5.3   | Spectra of <b>S5</b> .....                                                                          | 15 |
| 5.4   | Spectra of <b>S6</b> .....                                                                          | 17 |
| 5.5   | Spectra of <b>S7</b> .....                                                                          | 18 |
| 5.6   | Spectra of <b>S8</b> .....                                                                          | 20 |
| 5.7   | Spectra of <b>S9</b> .....                                                                          | 22 |
| 5.8   | Spectra of <b>1<sub>Db</sub></b> .....                                                              | 24 |
| 5.9   | Spectra of <b>1<sub>Dc</sub></b> .....                                                              | 25 |
| 6     | Sonication Experiments.....                                                                         | 27 |
| 6.1   | Standard Sonication Procedure .....                                                                 | 27 |
| 6.2   | Sonication Experiments Overview .....                                                               | 27 |
| 6.2.1 | Sonication Experiments of Polymers <b>1<sub>Ha</sub></b> and <b>1<sub>Da</sub></b> .....            | 28 |
| 6.2.2 | Sonication Experiments of Polymers <b>1<sub>Hb</sub></b> and <b>1<sub>Db</sub></b> .....            | 30 |
| 6.2.3 | Sonication Experiments of Polymers <b>1<sub>Hc</sub></b> and <b>1<sub>Dc</sub></b> .....            | 31 |
| 6.3   | Post-Sonication NMR Spectra .....                                                                   | 32 |
| 7     | Calculations .....                                                                                  | 47 |
| 7.1   | CoGEF.....                                                                                          | 47 |
| 7.2   | Force-modified potential energy surfaces.....                                                       | 47 |
| 7.3   | Zoom on the force-modified potential energy surface of <b>R</b> ( $n_F = 1$ ) .....                 | 48 |
| 7.4   | Vibration of the C-X bond along the heterolytic pathway .....                                       | 50 |
| 7.5   | Amplitude of the C-X bond stretching along the heterolytic pathway for <b>R</b> ( $n_F = 1$ ) ..... | 51 |
| 8     | References .....                                                                                    | 52 |

## 2 General Experimental Details

Unless otherwise stated, all reagents and solvents were purchased from commercial suppliers. All other chemicals were used without further purification. Compounds **S1** – **S2** along with polymers **1<sub>Ha</sub>**, **1<sub>Da</sub>**, **2<sub>Hb</sub>**, **2<sub>Hc</sub>**, **5<sub>Ha</sub>**, **5<sub>Hb</sub>**, **5<sub>Hc</sub>** and **S10** were synthesised according to previously reported procedures.<sup>1</sup>

Gel permeation chromatography (GPC) analyses were performed in THF solution (1 mg mL<sup>-1</sup>) at 35 °C using a Malvern Viscotek GPCmax VE2001 solvent/sample module with 2 × PL gel 10 µm mixed-B and a PL gel 500 Å column, and equipped with a Viscotek VE 3240 UV/vis multichannel detector and Viscotek VE3580 refractive index detector employing narrow polydispersity polystyrene standards (Agilent Technologies) as a calibration reference. Samples were filtered through a Whatman Puradisc 4 mm syringe filter with 0.45 µm PTFE membrane before injection to equipment, and experiments were carried out with injection volume of 100 µL, flow rate of 1 mL min<sup>-1</sup>. Results were analysed using *n*-dodecane as an internal marker using Malvern OmniSEC 5.10 software.

Ultrasound experiments were performed using a Sonics VCX 500 ultrasonic processor equipped with a 13 mm diameter solid probe or replaceable-tip probe. The distance between the titanium tip and the bottom of the Suslick cell was 3 cm. The ultrasonic intensity was calibrated using the method outlined by Hickenboth *et al.*<sup>2</sup> The Suslick cells were fabricated by the Department of Chemistry glass workshop at the University of Manchester.

Analytical TLC was performed on precoated silica gel plates (0.25 mm thick, 60 F254, Merck, Germany) and observed under UV light or stained with either potassium permanganate or phosphomolybdic acid solution. Preparative TLC was performed on precoated silica gel plates: 2 mm, UNIPLATE GF, Analtech Inc., DE, USA. Flash column chromatography was performed with silica gel 60 (230-400 mesh) from Sigma-Aldrich. <sup>1</sup>H and <sup>13</sup>C NMR spectra were obtained using either a Bruker Avance III 500 MHz Prodigy instrument or a Bruker Avance III 400 MHz Prodigy instrument at the University of Manchester. Chemical shifts are reported in parts per million (ppm) from high to low frequency and referenced to the residual solvent resonance. Coupling constants (*J*) are reported in Hertz (Hz) and splitting patterns are designated as follows: br = broad, s = singlet, d = doublet, t = triplet, q = quartet, p = pentet and m = multiplet. Mass spectra were obtained through the Mass Spectrometry services in the Department of Chemistry at the University of Manchester.

Isotopic purity of **S3-5** and **S7-9** was determined from the integration of the residual protic signal in <sup>1</sup>H NMR spectra.

**Abbreviations:** APCI: atmospheric pressure chemical ionization; DCM: dichloromethane; ESI: electrospray ionization; PE: petroleum ether; HRMS: high resolution mass spectrometry; MS: mass spectrometry; PMDETA: *N,N,N',N'',N''*-pentamethyldiethylenetriamine; THF: tetrahydrofuran; TLC: thin layer chromatography.

### 3 Synthesis of mechanophores and reference compounds

#### 3.1 Synthetic Route to S5

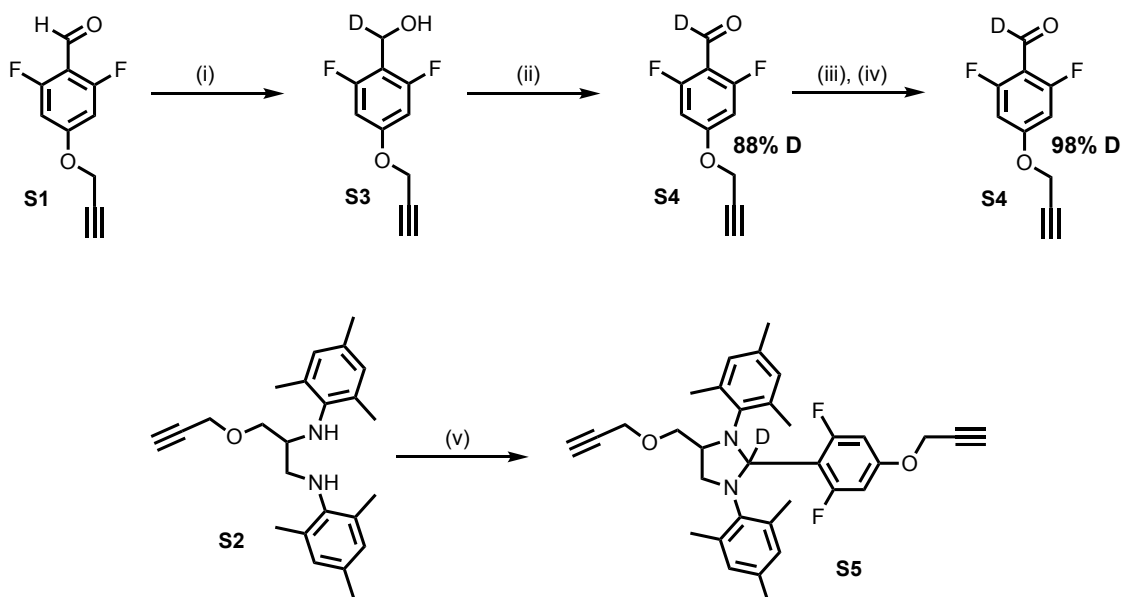

**Scheme S1.** Synthetic route to **S5**. Conditions: (i) NaBD<sub>4</sub>, THF/EtOH, r.t., 16 h, 94% yield; (ii) PCC, DCM, 0 °C, 1 h; (iii) NaBD<sub>4</sub>, THF/EtOH, r.t., 16 h; (iv) PCC, DCM, 0 °C, 1 h; (v) **S4** (98% D), acetic acid, r.t., 30 min, 38% yield.

##### 3.1.1 Synthesis of S3

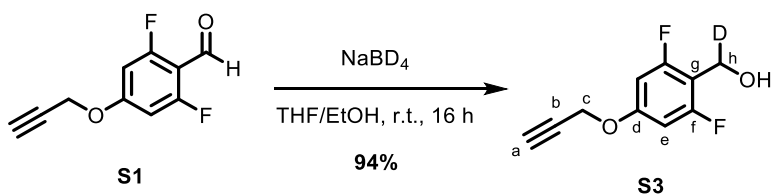

**S1** (100 mg, 0.510 mmol, 1 eq.) was dissolved in a mixture of THF (0.6 mL) and ethanol (0.6 mL). NaBD<sub>4</sub> (11 mg, 0.255 mmol, 0.5 eq.) was added and the mixture stirred under N<sub>2</sub> for 16 h. The mixture was carefully washed with water and the aqueous mixture thoroughly extracted with DCM. The organic phase was dried over magnesium sulfate before being filtered and condensed to give the pure product as a white powder (95 mg, 0.477 mmol, 94% yield).

**<sup>1</sup>H NMR** (400 MHz, CDCl<sub>3</sub>)  $\delta$  = 6.62 – 6.50 (m, 2H, H<sub>e</sub>), 4.77 – 4.63 (m, 3H, H<sub>c</sub> + H<sub>h</sub>), 2.56 (td,  $J$  = 2.4, 0.7 Hz, 1H, H<sub>a</sub>), 1.77 (d,  $J$  = 6.3 Hz, 1H, H<sub>i</sub>).

**<sup>13</sup>C NMR** (101 MHz, CDCl<sub>3</sub>)  $\delta$  = 162.19 (dd,  $J$  = 247.5, 11.7 Hz, C<sub>f</sub>), 158.81 (t,  $J$  = 14.4 Hz, C<sub>d</sub>), 109.65 (t,  $J$  = 20.4 Hz, C<sub>g</sub>), 99.65 – 98.60 (m, C<sub>e</sub>), 77.36 (C<sub>b</sub>), 76.63 (C<sub>a</sub>), 56.42 (C<sub>c</sub>), 53.16 – 52.11 (m, C<sub>h</sub>).

**<sup>19</sup>F NMR** (376 MHz, CDCl<sub>3</sub>)  $\delta$  = -115.20 (F<sub>f</sub>).

**<sup>2</sup>H NMR** (61 MHz, CHCl<sub>3</sub>)  $\delta$  = 4.73 (s, 1D, D<sub>h</sub>).

**HRMS-API(+)**: 182.0519 [M-OH]<sup>+</sup>, calculated for C<sub>10</sub>H<sub>6</sub>DF<sub>2</sub>O: 182.0522.



### 3.1.2 Synthesis of S4

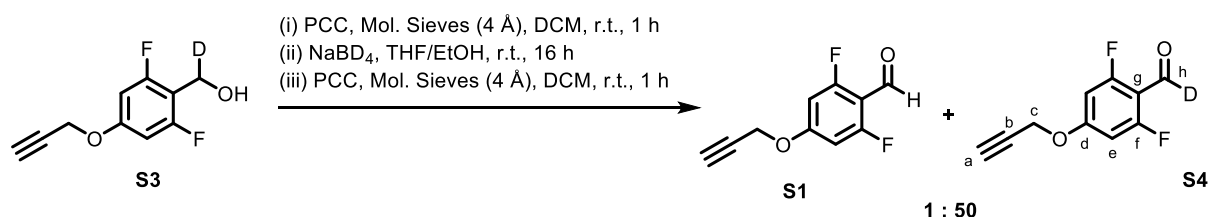

PCC (541 mg, 2.51 mmol, 5 eq.) and molecular sieves (4 Å, 0.5 g) were added to DCM (2.5 mL) and the mixture was cooled in an ice bath. **S3** (100 mg, 0.510 mmol, 1 eq.) was dissolved in DCM (2.5 mL) and the solution added dropwise to the reaction mixture. The mixture was stirred for 30 min. After warming to room temperature the mixture was stirred for a further 30 min. The mixture was passed through a silica plug using DCM. The collected solution was condensed to give the product mixture as an off-white powder (88% D).

The product mixture, containing both **S1** and **S4**, was taken and used again in the reduction process detailed in Section 3.1.1, *Synthesis of S3*. After, the resulting product mixture was subjected once more to the oxidation procedure described here to yield the product as an off-white powder (98% D).

**<sup>1</sup>H NMR** (400 MHz, CDCl<sub>3</sub>) δ = 6.69 – 6.50 (m, 2H, H<sub>e</sub>), 4.75 (d, *J* = 2.4 Hz, 2H, H<sub>c</sub>), 2.62 (t, *J* = 2.4 Hz, 1H, H<sub>a</sub>).

**<sup>13</sup>C NMR** (101 MHz, CDCl<sub>3</sub>) δ = 183.87 – 182.63 (m, C<sub>h</sub>), 165.82 – 163.40 (m, C<sub>i</sub>), 163.86 – 163.46 (m, C<sub>d</sub>), 109.12 – 108.61 (m, C<sub>g</sub>), 100.01 – 99.56 (m, C<sub>e</sub>), 77.53 (d, *J* = 8.4 Hz, C<sub>b</sub>), 76.56 (d, *J* = 1.9 Hz, C<sub>a</sub>), 56.81 (C<sub>c</sub>).

**<sup>19</sup>F NMR** (376 MHz, CDCl<sub>3</sub>) δ = -112.56 (F<sub>f</sub>).

**<sup>2</sup>H NMR** (61 MHz, CHCl<sub>3</sub>) δ = 10.25 (s, 1D, D<sub>h</sub>).

**HRMS-ESI(+)**: 198.0469 [M+H]<sup>+</sup>, calculated for C<sub>10</sub>H<sub>6</sub>DF<sub>2</sub>O<sub>2</sub>: 198.0471.

### 3.1.3 Synthesis of S5

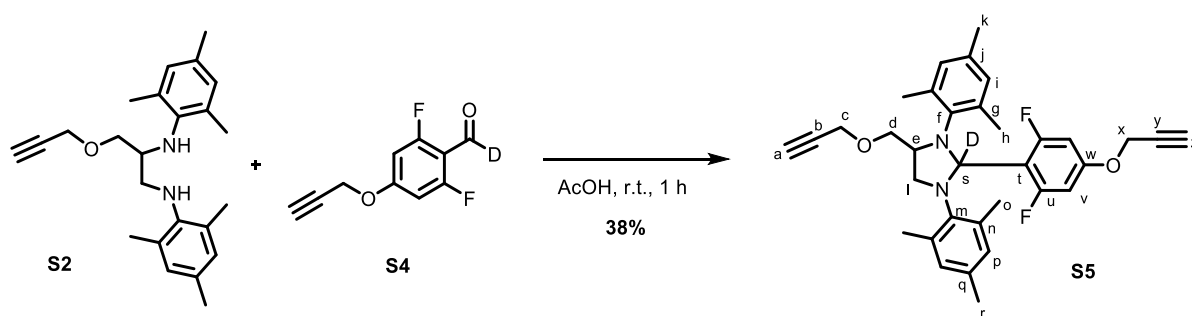

**S2** (100 mg, 0.274 mmol, 1 eq.) was dissolved in minimal acetic acid. **S4** (81 mg, 0.411 mmol, 1.5 eq.) was added and the mixture was stirred for 30 min during which a large amount of precipitate formed. The mixture was filtered and the filtered solid thoroughly washed with cold methanol. The filtered white solid was the pure product (57 mg, 0.105 mmol, 38% yield, 99% D).

**<sup>1</sup>H NMR** (500 MHz, CDCl<sub>3</sub>) δ = 6.88 (d, *J* = 2.2 Hz, 1H, H<sub>i</sub> or H<sub>p</sub>), 6.82 – 6.62 (m, 3H, H<sub>i</sub> + H<sub>p</sub>), 6.38 (dt, *J* = 12.6, 2.1 Hz, 1H, H<sub>v</sub>), 6.11 (dt, *J* = 12.0, 2.0 Hz, 1H, H<sub>v</sub>), 4.52 (d, *J* = 2.4 Hz, 2H, H<sub>x</sub>), 4.15 (dd, *J* = 3.5, 2.4 Hz, 2H, H<sub>c</sub>), 4.06 – 4.00 (m, 1H, H<sub>d</sub>), 3.91 – 3.84 (m, 1H, H<sub>i</sub>), 3.82 – 3.74 (m, 1H, H<sub>e</sub>), 3.68 – 3.62 (m, 2H, H<sub>d</sub> + H<sub>i</sub>), 2.52 (s, 3H, H<sub>h</sub> or H<sub>k</sub> or H<sub>o</sub> or H<sub>r</sub>), 2.50 (t, *J* = 2.4 Hz, 1H, H<sub>z</sub>), 2.46 (br, 6H, H<sub>h</sub> or H<sub>k</sub> or H<sub>o</sub> or H<sub>r</sub>),

2.41 (t,  $J = 2.4$  Hz, 1H, H<sub>a</sub>), 2.21 (s, 3H, H<sub>h</sub> or H<sub>k</sub> or H<sub>o</sub> or H<sub>r</sub>), 2.17 (s, 3H, H<sub>h</sub> or H<sub>k</sub> or H<sub>o</sub> or H<sub>r</sub>), 1.98 (s, 3H, H<sub>h</sub> or H<sub>k</sub> or H<sub>o</sub> or H<sub>r</sub>).

<sup>13</sup>C NMR (126 MHz, CDCl<sub>3</sub>)  $\delta = 164.80 - 161.38$  (m, C<sub>u</sub>), 158.15 (t,  $J = 14.7$  Hz, C<sub>w</sub>), 140.86 (C<sub>f</sub> or C<sub>g</sub> or C<sub>j</sub> or C<sub>m</sub> or C<sub>n</sub> or C<sub>q</sub>), 140.71 (C<sub>f</sub> or C<sub>g</sub> or C<sub>j</sub> or C<sub>m</sub> or C<sub>n</sub> or C<sub>q</sub>), 138.32 (C<sub>f</sub> or C<sub>g</sub> or C<sub>j</sub> or C<sub>m</sub> or C<sub>n</sub> or C<sub>q</sub>), 137.10 (C<sub>f</sub> or C<sub>g</sub> or C<sub>j</sub> or C<sub>m</sub> or C<sub>n</sub> or C<sub>q</sub>), 135.91 (C<sub>f</sub> or C<sub>g</sub> or C<sub>j</sub> or C<sub>m</sub> or C<sub>n</sub> or C<sub>q</sub>), 134.91 (C<sub>f</sub> or C<sub>g</sub> or C<sub>j</sub> or C<sub>m</sub> or C<sub>n</sub> or C<sub>q</sub>), 130.87 (C<sub>i</sub> or C<sub>p</sub>), 130.32 (br, C<sub>i</sub> or C<sub>p</sub>), 129.76 (br, C<sub>i</sub> or C<sub>p</sub>), 129.32 (C<sub>i</sub> or C<sub>p</sub>), 110.23 (t,  $J = 12.9$  Hz, C<sub>t</sub>), 98.95 (ddd,  $J = 303.3, 27.4, 3.3$  Hz, C<sub>v</sub>), 80.12 (C<sub>b</sub>), 77.61 (C<sub>y</sub>), 76.35 (C<sub>z</sub>), 74.38 (d,  $J = 2.3$  Hz, C<sub>a</sub>), 73.36 (C<sub>d</sub>), 72.91 – 72.24 (m, C<sub>s</sub>), 62.27 (C<sub>e</sub>), 58.52 (C<sub>c</sub>), 56.21 (C<sub>x</sub>), 53.58 (C<sub>l</sub>), 20.88 (C<sub>h</sub> or C<sub>k</sub> or C<sub>o</sub> or C<sub>r</sub>), 20.74 (C<sub>h</sub> or C<sub>k</sub> or C<sub>o</sub> or C<sub>r</sub>), 20.28 (C<sub>h</sub> or C<sub>k</sub> or C<sub>o</sub> or C<sub>r</sub>), 18.96 (C<sub>h</sub> or C<sub>k</sub> or C<sub>o</sub> or C<sub>r</sub>), 18.44 (C<sub>h</sub> or C<sub>k</sub> or C<sub>o</sub> or C<sub>r</sub>).

<sup>19</sup>F NMR (376 MHz, CDCl<sub>3</sub>)  $\delta = -103.90$  (d,  $J = 5.7$  Hz, 1F, F<sub>u</sub>),  $-116.72$  (d,  $J = 5.6$  Hz, 1F, F<sub>u</sub>).

<sup>2</sup>H NMR (77 MHz, CHCl<sub>3</sub>)  $\delta = 6.31$  (br, 1D, D<sub>s</sub>).

HRMS-APCI(+): 544.2871 [M+H]<sup>+</sup>, calculated for C<sub>34</sub>H<sub>36</sub>DF<sub>2</sub>O<sub>2</sub>N<sub>2</sub>: 544.2880.

### 3.2 Synthetic Route to S9

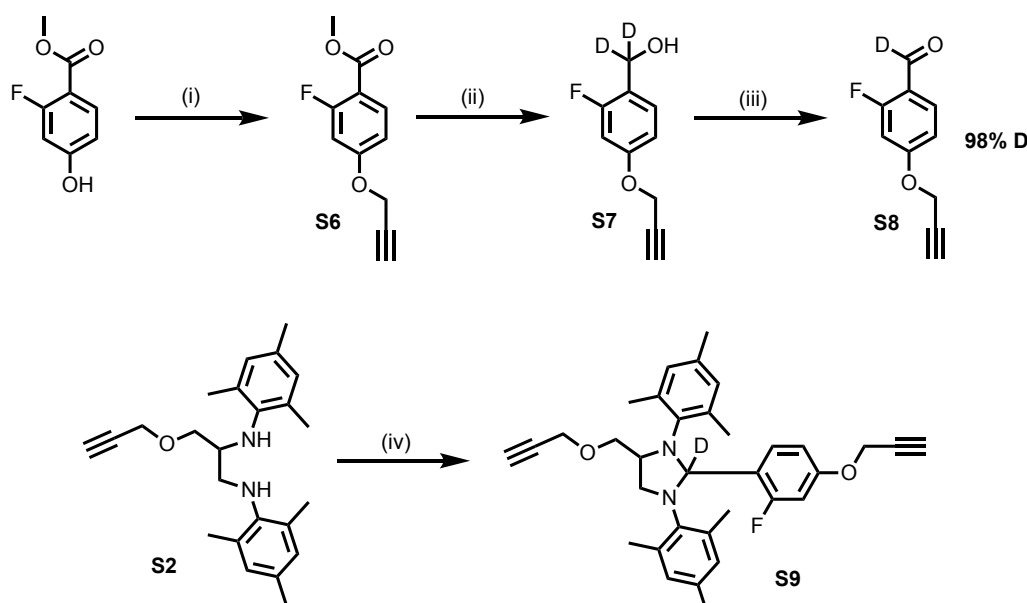

**Scheme S2.** Synthetic route to **S9**. Conditions: (i) K<sub>2</sub>CO<sub>3</sub>, propargyl bromide, MeCN, reflux, 6 h, 87% yield; (ii) NaBD<sub>4</sub>, THF/EtOH, 40 °C, 48 h, 48% yield; (iii) PCC, DCM, 0 °C, 1 h, 79% yield; (iv) **S8**, acetic acid, r.t., 30 min, 60% yield.

#### 3.2.1 Synthesis of S6

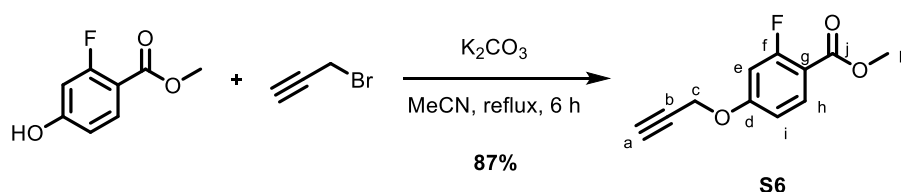

Methyl 2-fluoro-4-hydroxybenzoate (1.00 g, 5.88 mmol, 1 eq.) and potassium carbonate (1.22 g, 8.82 mmol, 1.5 eq.) were added to acetonitrile (29 mL). Propargyl bromide (80% in toluene, 0.79 mL, 8.82 mmol, 1.5 eq.) was added and the mixture was refluxed for 6 h. The mixture was cooled to room temperature before being diluted with water to dissolve any salts. The aqueous mixture was thoroughly extracted with DCM. The organic extracts were dried over magnesium sulfate before being filtered and condensed to give the pure product as a pale yellow solid (1.06 g, 5.09 mmol, 87 % yield).

**<sup>1</sup>H NMR** (500 MHz, CDCl<sub>3</sub>) δ = 7.92 (t, *J* = 8.6 Hz, 1H, H<sub>h</sub>), 6.80 (ddd, *J* = 8.9, 2.5, 0.8 Hz, 1H, H<sub>i</sub>), 6.73 (dd, *J* = 12.4, 2.5 Hz, 1H, H<sub>e</sub>), 4.73 (d, *J* = 2.4 Hz, 2H, H<sub>c</sub>), 3.90 (s, 3H, H<sub>k</sub>), 2.57 (t, *J* = 2.4 Hz, 1H, H<sub>a</sub>).

**<sup>13</sup>C NMR** (126 MHz, CDCl<sub>3</sub>) δ = 164.67 (C<sub>j</sub>), 163.40 (d, *J* = 265.9 Hz, C<sub>f</sub>), 162.39 (d, *J* = 11.5 Hz, C<sub>d</sub>), 133.60 (d, *J* = 2.5 Hz, C<sub>h</sub>), 111.87 (d, *J* = 9.8 Hz, C<sub>g</sub>), 110.94 (d, *J* = 3.0 Hz, C<sub>i</sub>), 103.58 (d, *J* = 26.4 Hz, C<sub>e</sub>), 77.38 (C<sub>b</sub>), 76.71 (C<sub>a</sub>), 56.34 (C<sub>c</sub>), 52.24 (C<sub>k</sub>).

**<sup>19</sup>F NMR** (376 MHz, CDCl<sub>3</sub>) δ = -105.84 (F<sub>f</sub>).

**HRMS-APCI(+)**: 209.0608 [M+H]<sup>+</sup>, calculated for C<sub>11</sub>H<sub>10</sub>FO<sub>3</sub>: 209.0608.

### 3.2.2 Synthesis of S7

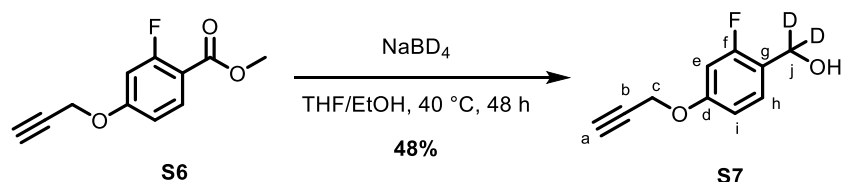

**S6** (0.50 g, 2.40 mmol, 1 eq.) was dissolved in a mixture of THF (2.4 mL) and ethanol (2.4 mL). NaBD<sub>4</sub> (0.20 g, 4.80 mmol, 2 eq.) was added and the mixture stirred at 40 °C under N<sub>2</sub> for 48 h. The mixture was carefully washed with water and the aqueous mixture thoroughly extracted with DCM. The organic phase was dried over magnesium sulfate before being filtered and condensed to give the pure product as a white powder (0.21 g, 1.15 mmol, 48% yield).

**<sup>1</sup>H NMR** (400 MHz, CDCl<sub>3</sub>) δ = 7.32 (t, *J* = 8.5 Hz, 1H, H<sub>h</sub>), 6.76 (ddd, *J* = 8.4, 2.5, 0.8 Hz, 1H, H<sub>i</sub>), 6.71 (dd, *J* = 11.6, 2.5 Hz, 1H, H<sub>e</sub>), 4.68 (d, *J* = 2.4 Hz, 2H, H<sub>c</sub>), 2.54 (t, *J* = 2.4 Hz, 1H, H<sub>a</sub>), 1.75 (d, *J* = 7.0 Hz, 1H, H<sub>k</sub>).

**<sup>13</sup>C NMR** (101 MHz, CDCl<sub>3</sub>) δ = 161.39 (d, *J* = 246.6 Hz, C<sub>f</sub>), 158.56 (d, *J* = 11.1 Hz, C<sub>d</sub>), 130.44 (d, *J* = 6.9 Hz, C<sub>h</sub>), 120.88 (dd, *J* = 15.5, 5.7 Hz, C<sub>g</sub>), 110.78 (d, *J* = 3.3 Hz, C<sub>i</sub>), 102.98 (d, *J* = 25.4 Hz, C<sub>e</sub>), 78.08 (C<sub>b</sub>), 76.12 (C<sub>a</sub>), 59.37 – 58.35 (m, C<sub>j</sub>), 56.23 (C<sub>c</sub>).

**<sup>19</sup>F NMR** (376 MHz, CDCl<sub>3</sub>) δ = -117.25 (F<sub>f</sub>).

**<sup>2</sup>H NMR** (77 MHz, CDCl<sub>3</sub>) δ = 4.67 (s, 2H, D<sub>j</sub>).

**MS-ESI(+)**: *m/z* = 165.0 (100, [M-OH]<sup>+</sup>).

### 3.2.3 Synthesis of S8

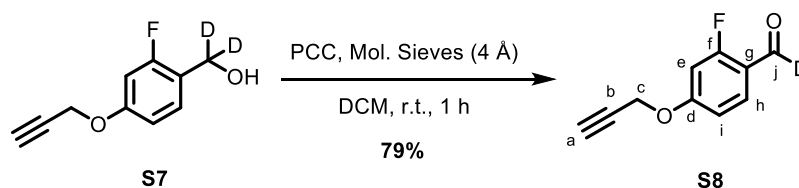

PCC (549 mg, 2.74 mmol, 5 eq.) and molecular sieves (4 Å, 0.5 g) were added to DCM (2.5 mL) and the mixture cooled in an ice bath. **S7** (100 mg, 0.549 mmol, 1 eq.) was dissolved in DCM (2.5 mL) and the solution was added dropwise to the reaction mixture. The mixture was stirred for 30 min. After warming to room temperature the mixture was stirred for a further 30 min. The mixture was passed through a silica plug using DCM. The collected solution was condensed to give the pure product as an off-white powder (78 mg, 0.435 mmol, 79% yield, 98% D).

**<sup>1</sup>H NMR** (500 MHz, CDCl<sub>3</sub>) δ = 7.83 (t, *J* = 8.5 Hz, 1H, H<sub>h</sub>), 6.85 (d, *J* = 8.8 Hz, 1H, H<sub>i</sub>), 6.74 (d, *J* = 12.1 Hz, 1H, H<sub>e</sub>), 4.76 (s, 2H, H<sub>c</sub>), 2.59 (s, 1H, H<sub>a</sub>).

**<sup>13</sup>C NMR** (126 MHz, CDCl<sub>3</sub>) δ = 186.13 – 185.31 (m, C<sub>i</sub>), 166.15 (d, *J* = 258.8 Hz, C<sub>f</sub>), 163.95 (d, *J* = 11.8 Hz, C<sub>d</sub>), 130.26 (d, *J* = 3.8 Hz, C<sub>h</sub>), 118.51 (d, *J* = 9.4 Hz, C<sub>g</sub>), 111.97 (C<sub>i</sub>), 102.70 (dd, *J* = 24.5, 4.2 Hz, C<sub>e</sub>), 77.09 (C<sub>b</sub>), 77.03 (C<sub>a</sub>), 56.46 (C<sub>c</sub>).

**<sup>19</sup>F NMR** (376 MHz, CDCl<sub>3</sub>) δ = -118.91 (F<sub>f</sub>).

**<sup>2</sup>H NMR** (61 MHz, CDCl<sub>3</sub>) δ = 10.27 (s, 1D, D<sub>j</sub>).

**HRMS-ESI(+)**: 180.0562 [M+H]<sup>+</sup>, calculated for C<sub>10</sub>H<sub>7</sub>DFO<sub>2</sub>: 180.0566.

### 3.2.4 Synthesis of S9

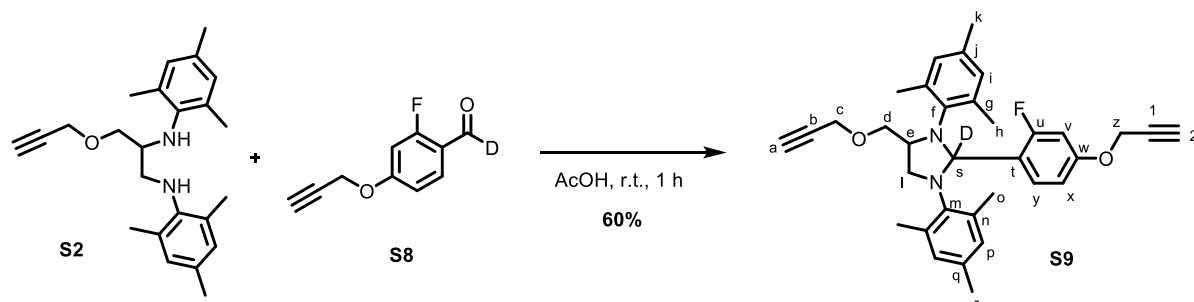

**S2** (100 mg, 0.274 mmol, 1 eq.) was dissolved in minimal acetic acid. **S9** (84 mg, 0.466 mmol, 1.7 eq.) was added and the mixture stirred for 30 min during which a large amount of precipitate formed. The mixture was filtered and the filtered solid thoroughly washed with cold methanol. The filtered white solid was the pure product (87 mg, 0.165 mmol, 60% yield). The extent of protonation at C<sub>s</sub> could not be determined by <sup>1</sup>H NMR but can be assumed to be ≤2% considering the isotopic purity of **S8**.

**<sup>1</sup>H NMR** (500 MHz, CDCl<sub>3</sub>) δ = 7.75 (s, 1H, H<sub>v</sub> or H<sub>x</sub> or H<sub>y</sub>), 6.89 (d, *J* = 2.2 Hz, 1H, H<sub>i</sub> or H<sub>p</sub>), 6.70 (d, *J* = 13.8 Hz, 4H, H<sub>i</sub> + H<sub>p</sub> + H<sub>v</sub> or H<sub>x</sub> or H<sub>y</sub>), 6.27 (d, *J* = 12.0 Hz, 1H, H<sub>v</sub> or H<sub>x</sub> or H<sub>y</sub>), 4.53 (d, *J* = 2.4 Hz, 2H, H<sub>z</sub>), 4.25 – 4.10 (m, 2H, H<sub>c</sub>), 3.90 (dt, *J* = 16.2, 8.8 Hz, 2H, H<sub>d</sub> + H<sub>i</sub>), 3.78 – 3.69 (m, 1H, H<sub>e</sub>), 3.61 (dd, *J* = 8.5, 5.0 Hz, 2H, H<sub>d</sub> + H<sub>i</sub>), 2.54 (s, 3H, H<sub>h</sub> or H<sub>k</sub> or H<sub>o</sub> or H<sub>r</sub>), 2.48 (t, *J* = 2.4 Hz, 1H, H<sub>2</sub>), 2.41 (s, 7H, H<sub>a</sub> + H<sub>h</sub> or H<sub>k</sub> or H<sub>o</sub> or H<sub>r</sub>), 2.21 (s, 3H, H<sub>h</sub> or H<sub>k</sub> or H<sub>o</sub> or H<sub>r</sub>), 2.16 (s, 3H, H<sub>h</sub> or H<sub>k</sub> or H<sub>o</sub> or H<sub>r</sub>), 1.79 (s, 3H, H<sub>h</sub> or H<sub>k</sub> or H<sub>o</sub> or H<sub>r</sub>).

**<sup>13</sup>C NMR** (126 MHz, CDCl<sub>3</sub>) δ = 162.60 (d, *J* = 247.2 Hz, C<sub>u</sub>), 158.09 (d, *J* = 11.2 Hz, C<sub>w</sub>), 140.34 (C<sub>f</sub> or C<sub>g</sub> or C<sub>j</sub> or C<sub>m</sub> or C<sub>n</sub> or C<sub>q</sub>), 138.42 (C<sub>f</sub> or C<sub>g</sub> or C<sub>j</sub> or C<sub>m</sub> or C<sub>n</sub> or C<sub>q</sub>), 137.15 (C<sub>f</sub> or C<sub>g</sub> or C<sub>j</sub> or C<sub>m</sub> or C<sub>n</sub> or C<sub>q</sub>), 135.83 (C<sub>f</sub> or C<sub>g</sub> or C<sub>j</sub> or C<sub>m</sub> or C<sub>n</sub> or C<sub>q</sub>), 134.89 (C<sub>f</sub> or C<sub>g</sub> or C<sub>j</sub> or C<sub>m</sub> or C<sub>n</sub> or C<sub>q</sub>), 131.82 (d, *J* = 5.8 Hz, C<sub>f</sub> or C<sub>g</sub> or C<sub>j</sub> or C<sub>m</sub> or C<sub>n</sub> or C<sub>q</sub>), 130.78 (C<sub>i</sub> or C<sub>p</sub>), 130.53 (br, C<sub>i</sub> or C<sub>p</sub>), 129.40 (br, C<sub>i</sub> or C<sub>p</sub>), 129.19 (C<sub>i</sub> or C<sub>p</sub>), 120.23 (C<sub>t</sub> or C<sub>v</sub> or C<sub>x</sub> or C<sub>y</sub>), 110.78 (C<sub>t</sub> or C<sub>v</sub> or C<sub>x</sub> or C<sub>y</sub>), 101.13 (C<sub>t</sub> or C<sub>v</sub> or C<sub>x</sub> or C<sub>y</sub>), 101.02 (C<sub>t</sub> or C<sub>v</sub> or C<sub>x</sub> or C<sub>y</sub>), 80.06 (C<sub>b</sub>), 78.18 (C<sub>1</sub>), 75.82 (C<sub>2</sub>), 74.49 (C<sub>a</sub>), 73.77 (C<sub>d</sub>), 72.44 (br, C<sub>s</sub>), 61.64 (C<sub>e</sub>), 58.49 (C<sub>c</sub>), 55.99 (C<sub>z</sub>), 52.94 (C<sub>i</sub>), 20.88 (C<sub>h</sub> or C<sub>k</sub> or C<sub>o</sub> or C<sub>r</sub>), 20.71 (C<sub>h</sub> or C<sub>k</sub> or C<sub>o</sub> or C<sub>r</sub>), 20.28 (C<sub>h</sub> or C<sub>k</sub> or C<sub>o</sub> or C<sub>r</sub>), 19.29 (C<sub>h</sub> or C<sub>k</sub> or C<sub>o</sub> or C<sub>r</sub>), 18.92 (C<sub>h</sub> or C<sub>k</sub> or C<sub>o</sub> or C<sub>r</sub>), 18.43 (C<sub>h</sub> or C<sub>k</sub> or C<sub>o</sub> or C<sub>r</sub>).

**<sup>19</sup>F NMR** (376 MHz, CDCl<sub>3</sub>) δ = -121.22 (F<sub>u</sub>).

**<sup>2</sup>H NMR** (61 MHz, CHCl<sub>3</sub>) δ = 6.23 (br, 1D, D<sub>s</sub>).

**HRMS-APCI(+)**: 526.2963 [M+H]<sup>+</sup>, calculated for C<sub>34</sub>H<sub>37</sub>DFO<sub>2</sub>N<sub>2</sub>: 526.2975.

## 4 Synthesis of Polymers:

### 4.1 Representative procedure: synthesis of 1<sub>Db</sub>

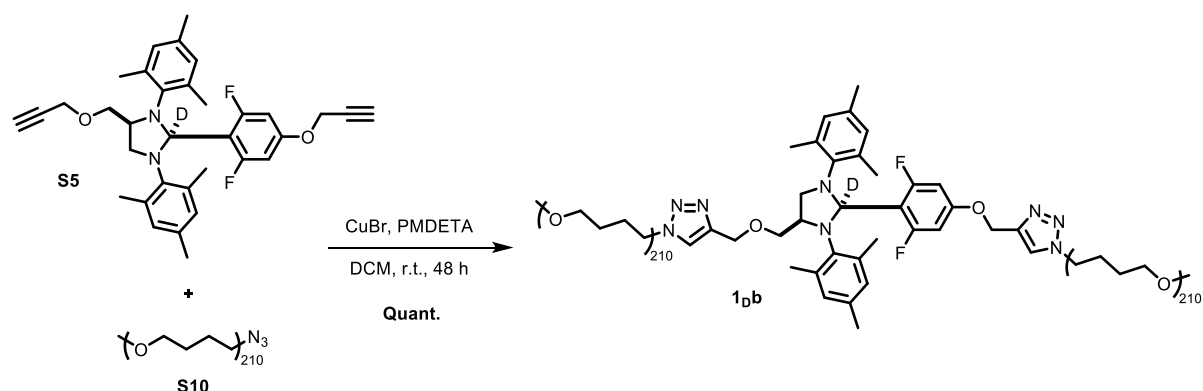

**S10** (240 mg, 16  $\mu$ mol, 2.5 eq.) and **S5** (3.5 mg, 6  $\mu$ mol, 1.0 eq.) were dissolved in DCM (20 mL) and added to a sealed microwave vial. The solution was degassed via three freeze-thaw-pump cycles. In a separate sealed microwave vial was added DCM (1 mL) and PMDETA (23  $\mu$ L, 110  $\mu$ mol, 18.0 eq.). This solution was also degassed via three freeze-thaw-pump cycles before being transferred via cannula onto copper(I) bromide (10 mg, 72  $\mu$ mol, 12.0 eq.) in a third sealed microwave vial. This mixture was stirred until all of the copper(I) bromide had dissolved before the solution was degassed via a single freeze-thaw-pump cycle. This solution was then transferred via cannula onto the reaction mixture in the first microwave vial. The mixture was stirred for 48 h. The mixture was washed thoroughly with aqueous EDTA solution (0.25 M, pH 7) to remove copper species before being dried over sodium sulfate and condensed to give the product polymer which was thoroughly dried under high vacuum. Once dried, the polymer was carefully washed with acetonitrile to remove impurities before being dried under high vacuum again.

### 4.2 List of polymers

All polymers were analysed using GPC with the obtained results visible in *Table S1* and *Figures S1 – S6*. It should be noted that in the time between when GPC analysis was carried out for polymers **1<sub>Ha</sub>**/**1<sub>Da</sub>** and polymers **1<sub>Hb</sub>**/**1<sub>Db</sub>**/**1<sub>Hc</sub>**/**1<sub>Dc</sub>** the instrument's columns and calibrations were changed while polymer **1** was analysed using both configurations; this accounts for the visual discrepancy between GPC traces observed in *Figures S1 – S6*.

**Table S1.**  $M_n$  and  $\bar{D}$  values for polymers **1<sub>xa-c</sub>** and **S10** as measured by GPC.

| Polymer               | $M_n$ (GPC) / kDa | $\bar{D}$ |
|-----------------------|-------------------|-----------|
| <b>S10</b>            | 47.0              | 1.12      |
| <b>1<sub>Ha</sub></b> | 78.4              | 1.12      |
| <b>1<sub>Da</sub></b> | 72.9              | 1.20      |
| <b>1<sub>Hb</sub></b> | 72.4              | 1.14      |
| <b>1<sub>Db</sub></b> | 74.2              | 1.13      |
| <b>1<sub>Hc</sub></b> | 72.7              | 1.14      |
| <b>1<sub>Dc</sub></b> | 71.6              | 1.15      |

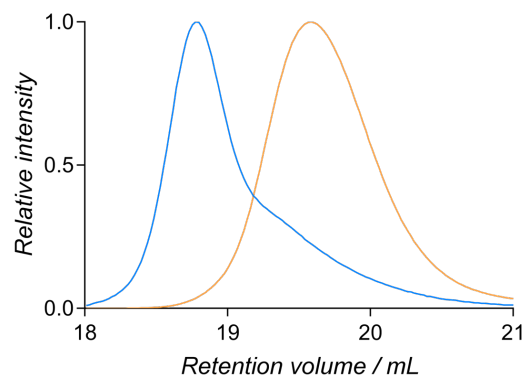

**Figure S1.** GPC traces showing polymers **1<sub>Ha</sub>** (left) and **S10** (right).

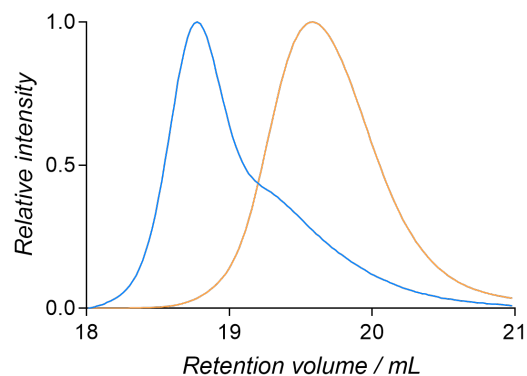

**Figure S2.** GPC traces showing polymers **1<sub>Pa</sub>** (left) and **S10** (right).

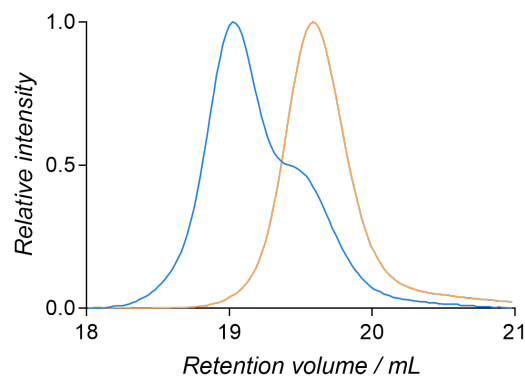

**Figure S3.** GPC traces showing polymers **1<sub>Hb</sub>** (left) and **S10** (right).

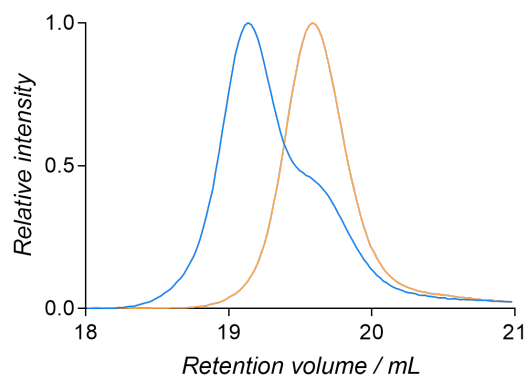

**Figure S4.** GPC traces showing polymers **1<sub>Pb</sub>** (left) and **S10** (right).

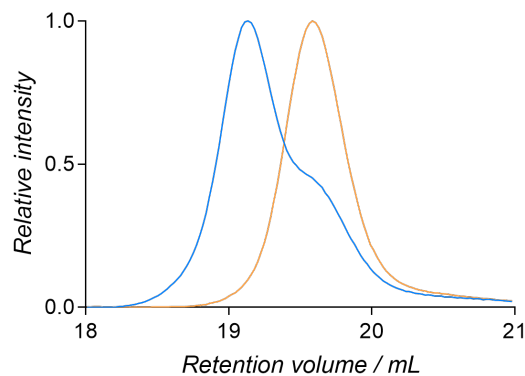

**Figure S5.** GPC traces showing polymers **1<sub>Hc</sub>** (left) and **S10** (right).

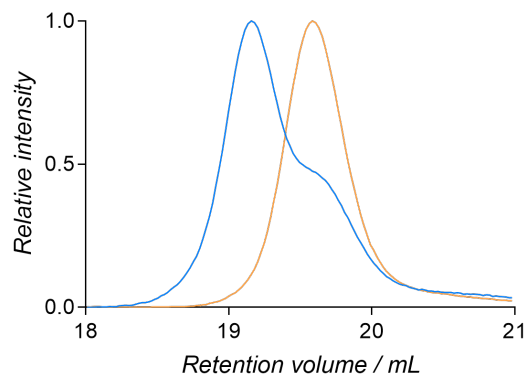

**Figure S6.** GPC traces showing polymers **1<sub>Pc</sub>** (left) and **S10** (right).

## 5 NMR Spectra

### 5.1 Spectra of S3

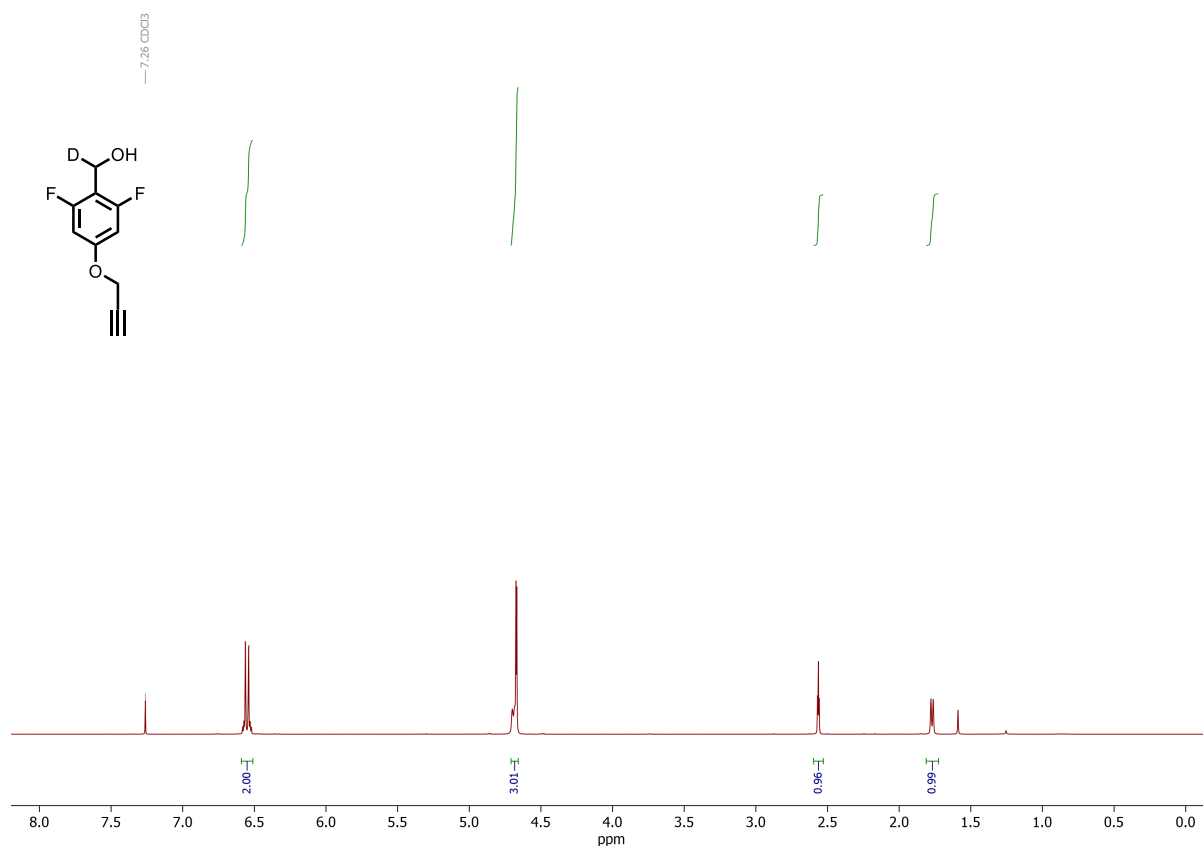

**Spectrum S1.** <sup>1</sup>H NMR (400 MHz, CDCl<sub>3</sub>, 298 K) of compound **S3**.

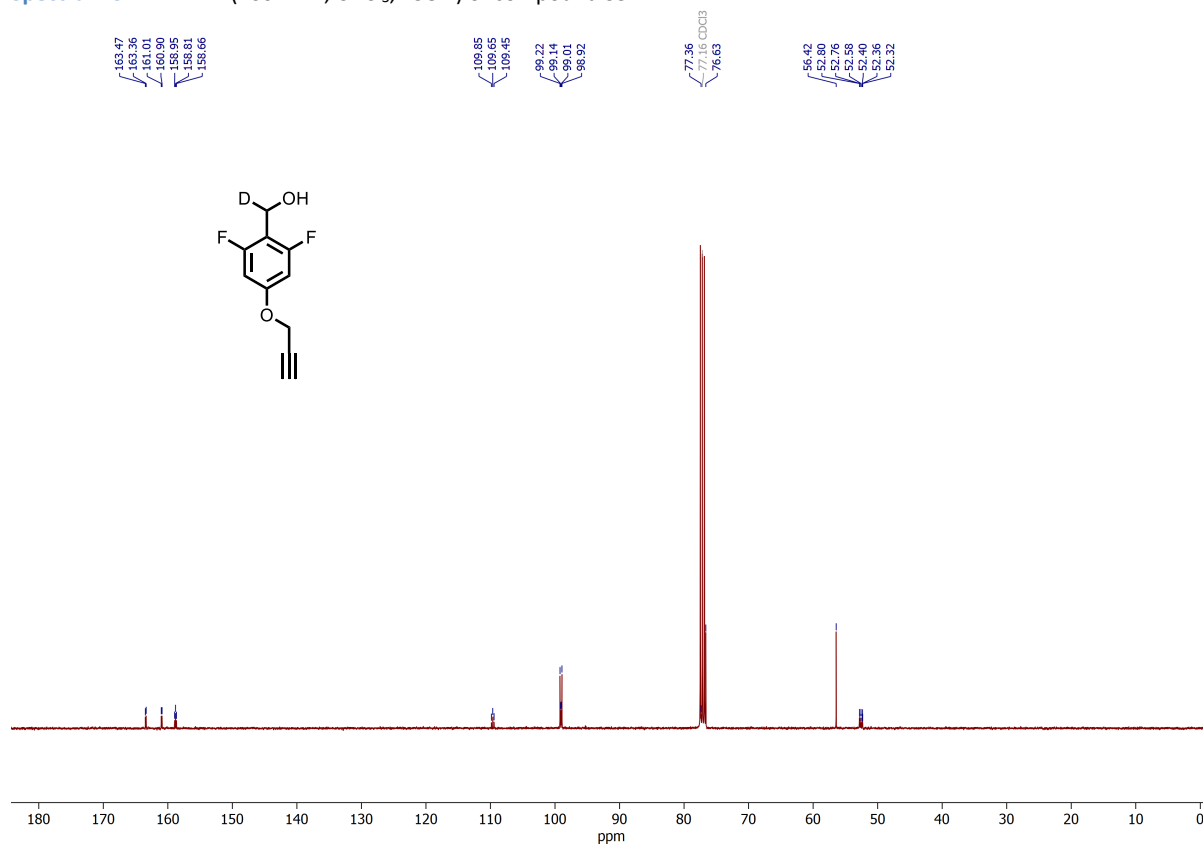

**Spectrum S2.** <sup>13</sup>C NMR (101 MHz, CDCl<sub>3</sub>, 298 K) of compound **S3**.

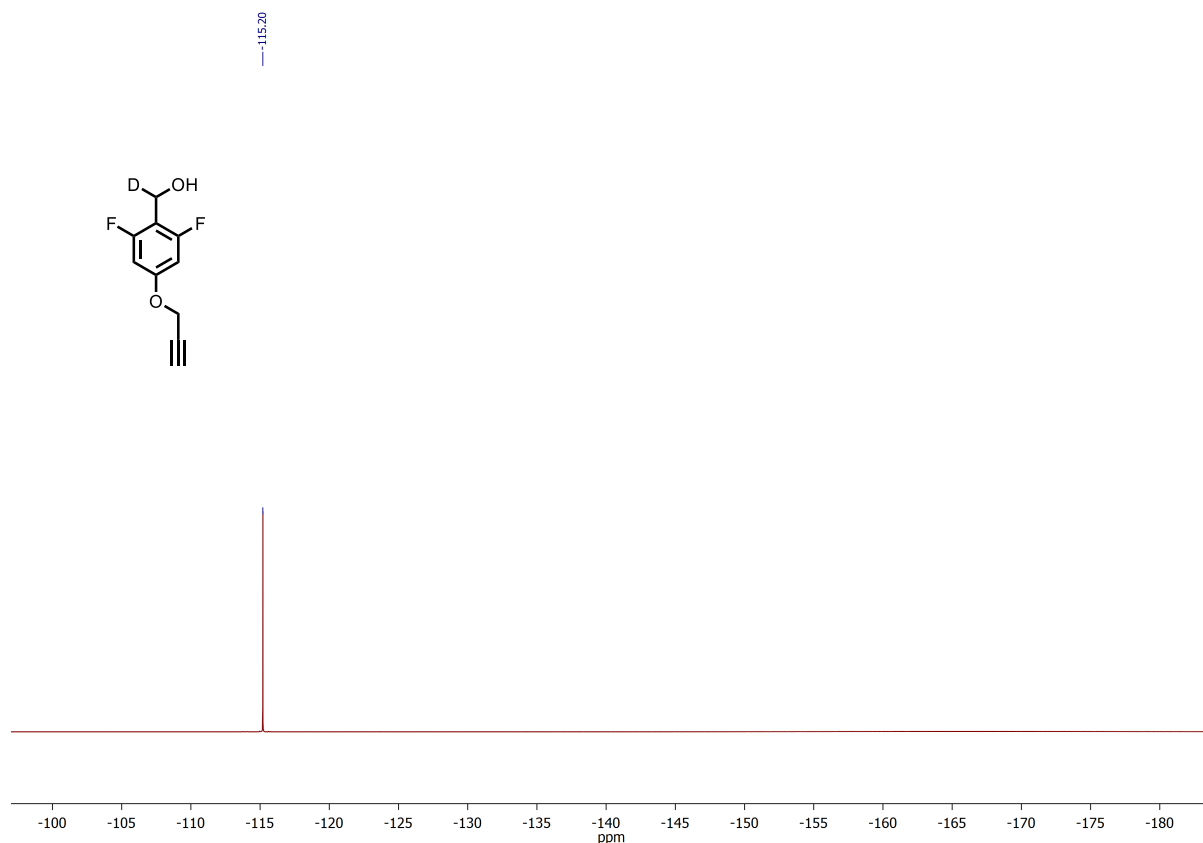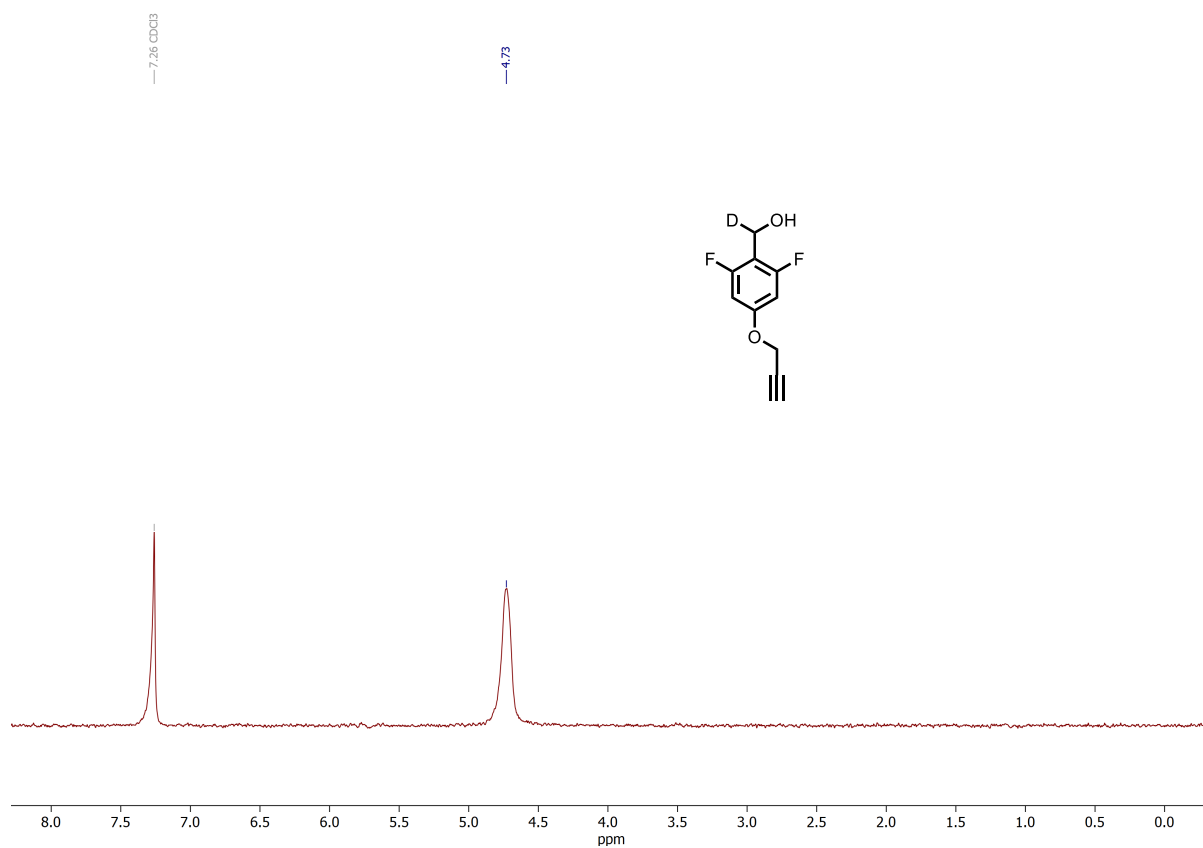



## 5.2 Spectra of S4

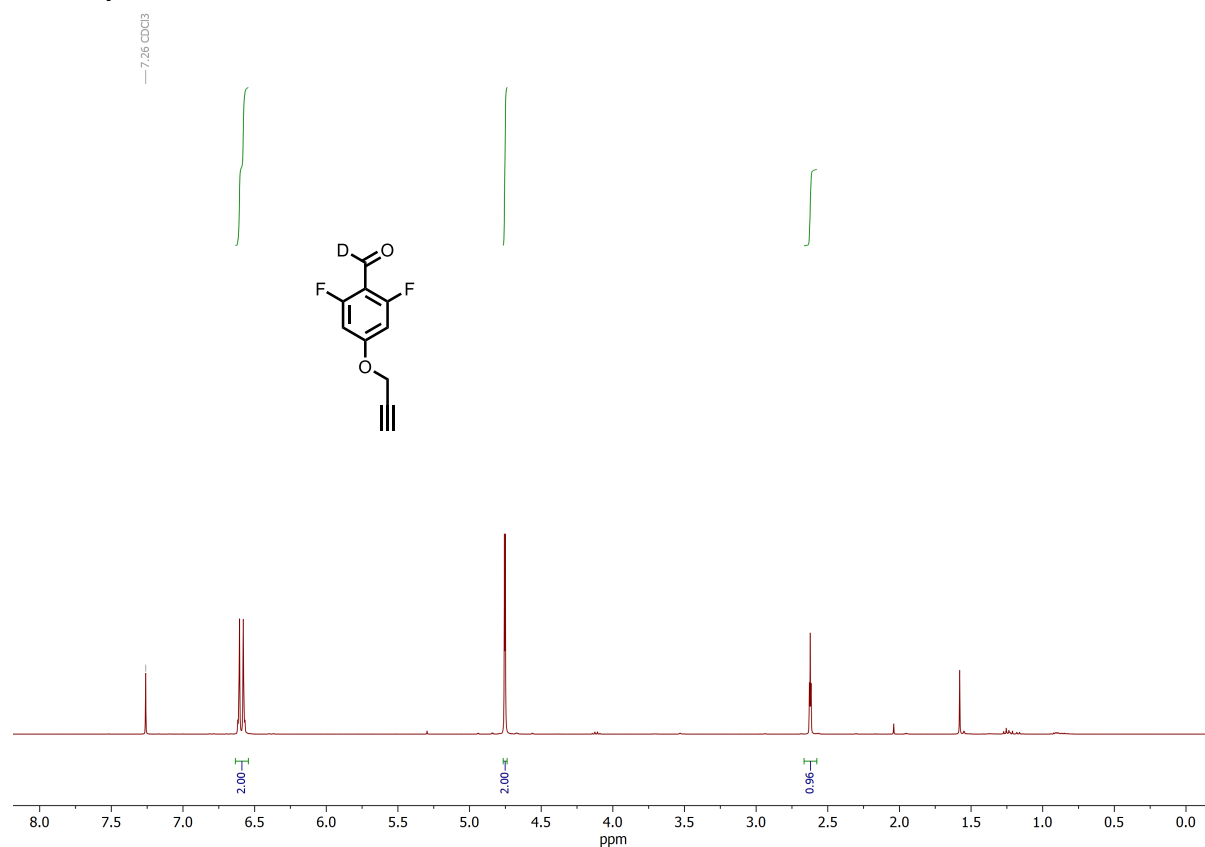

**Spectrum S5.** <sup>1</sup>H NMR (400 MHz, CDCl<sub>3</sub>, 298 K) of compound **S4**.

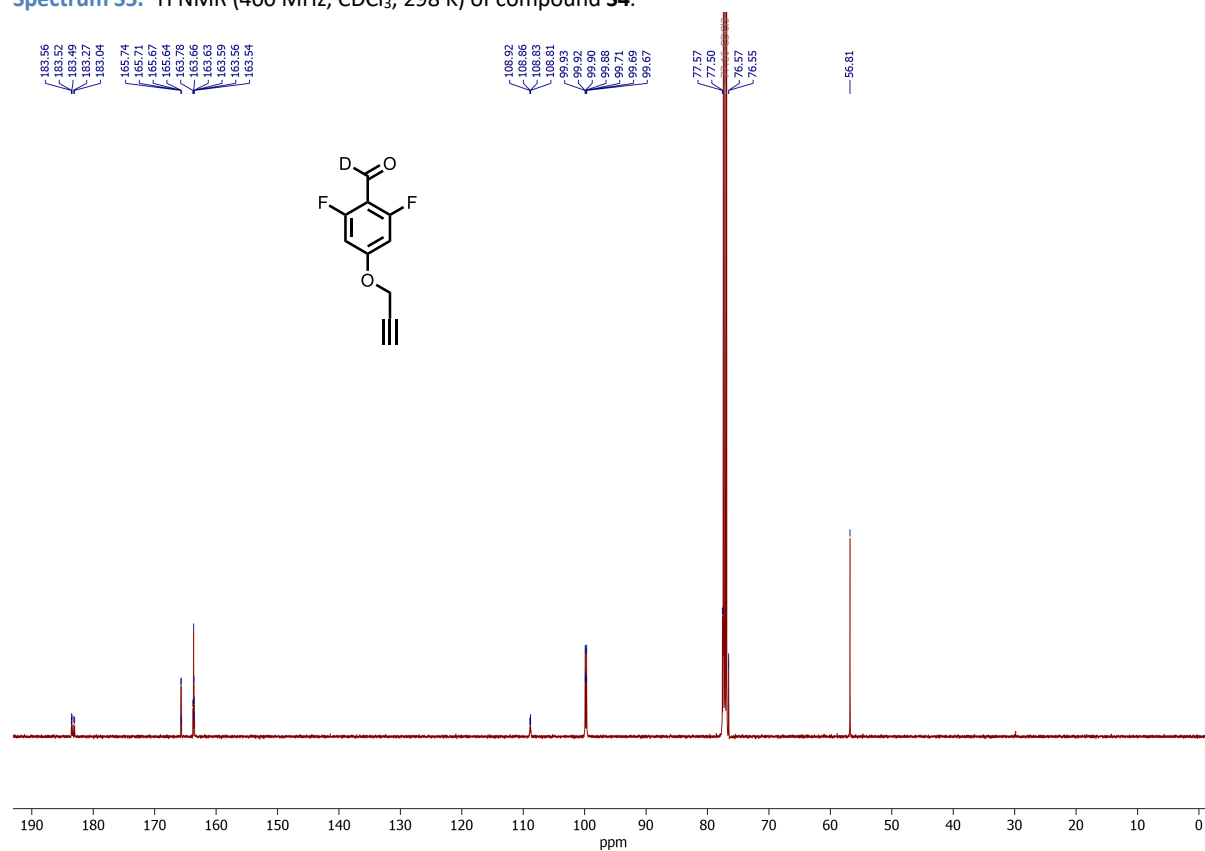

**Spectrum S6.** <sup>13</sup>C NMR (101 MHz, CDCl<sub>3</sub>, 298 K) of compound **S4**.

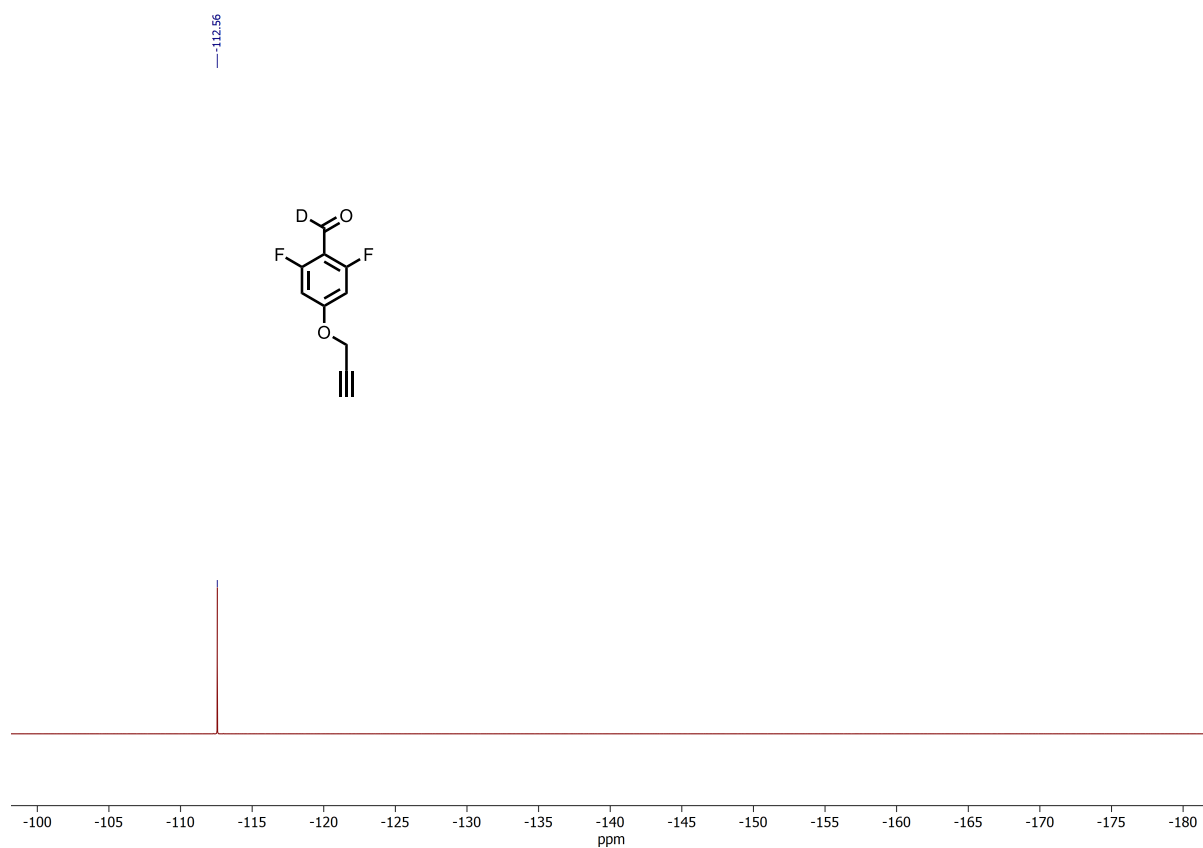

**Spectrum S7.**  $^{19}\text{F}$  NMR (376 MHz,  $\text{CDCl}_3$ , 298 K) of compound **S4**.

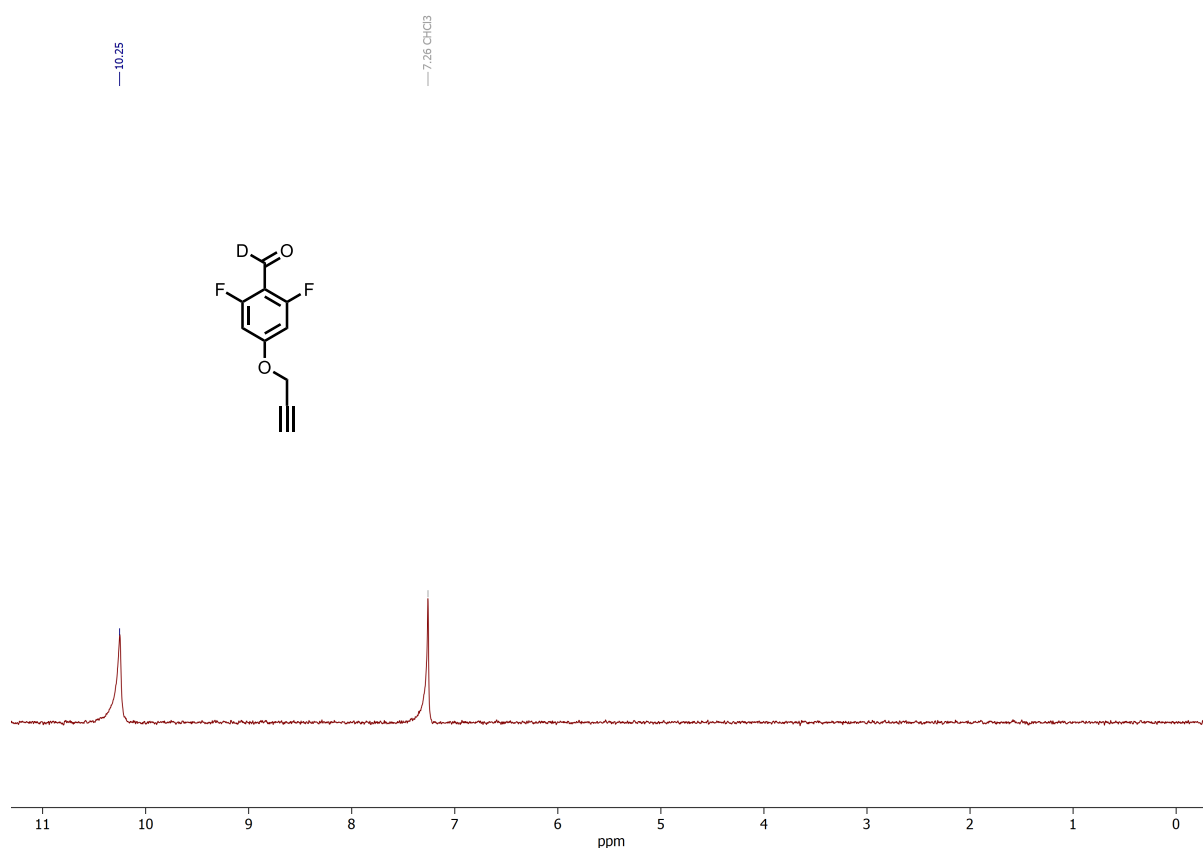

**Spectrum S8.**  $^2\text{H}$  NMR (61 MHz,  $\text{CHCl}_3$ , 298 K) of compound **S4**.

### 5.3 Spectra of S5

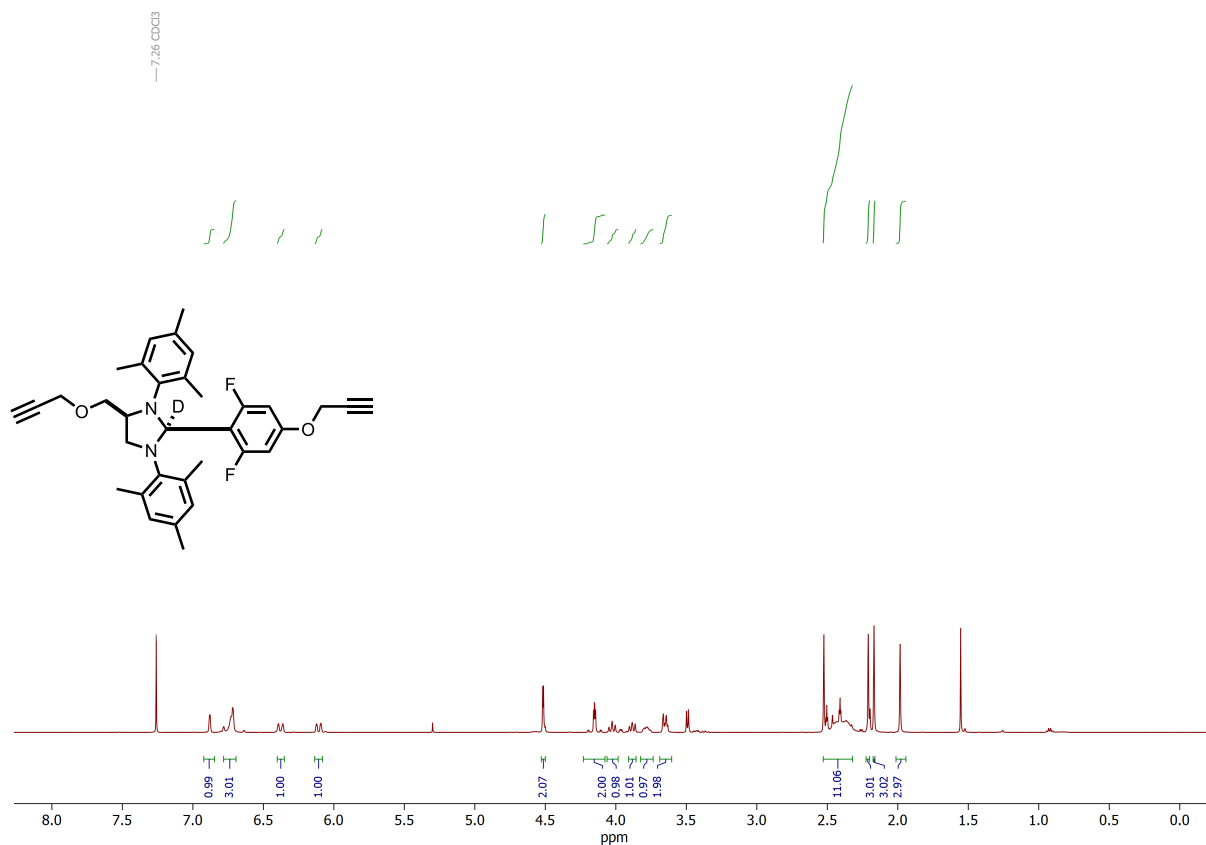

**Spectrum S9.** <sup>1</sup>H NMR (500 MHz, CDCl<sub>3</sub>, 298 K) of compound **S5**.

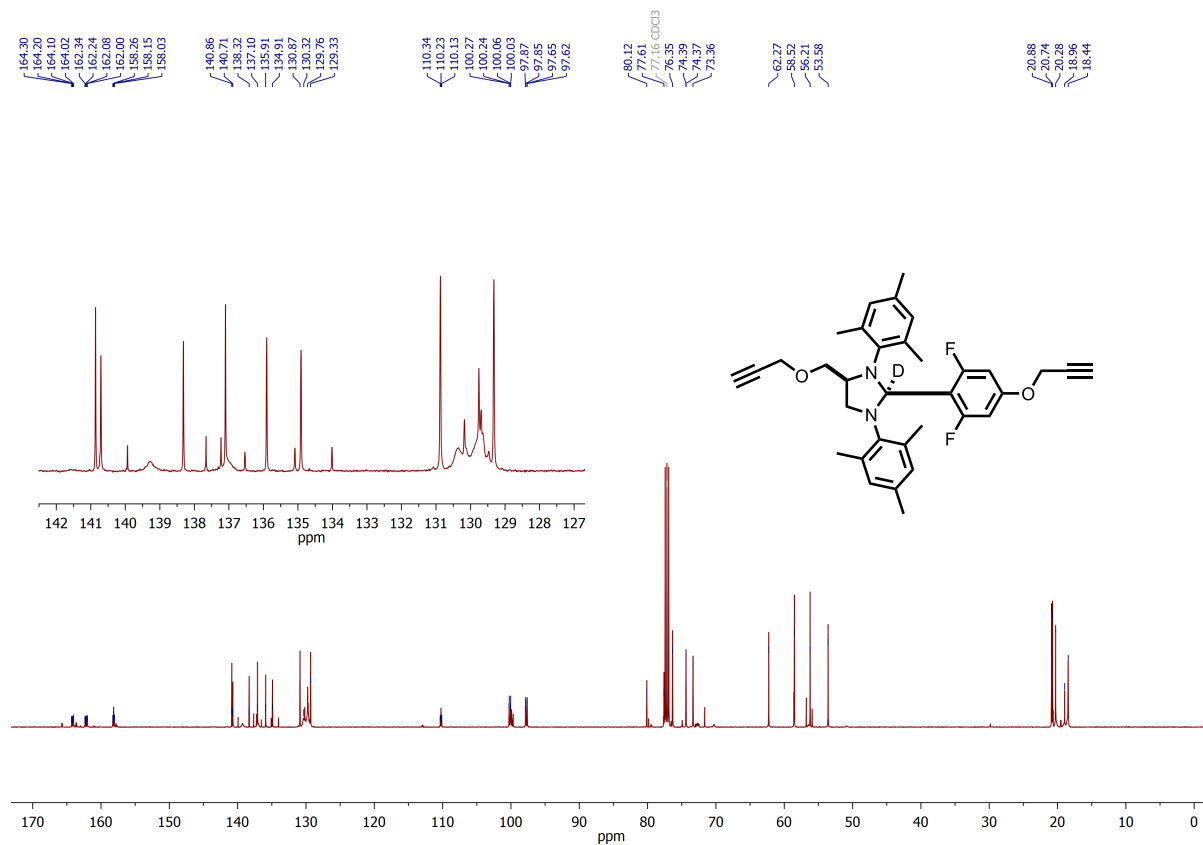

**Spectrum S10.** <sup>13</sup>C NMR (126 MHz, CDCl<sub>3</sub>, 298 K) of compound **S5**.

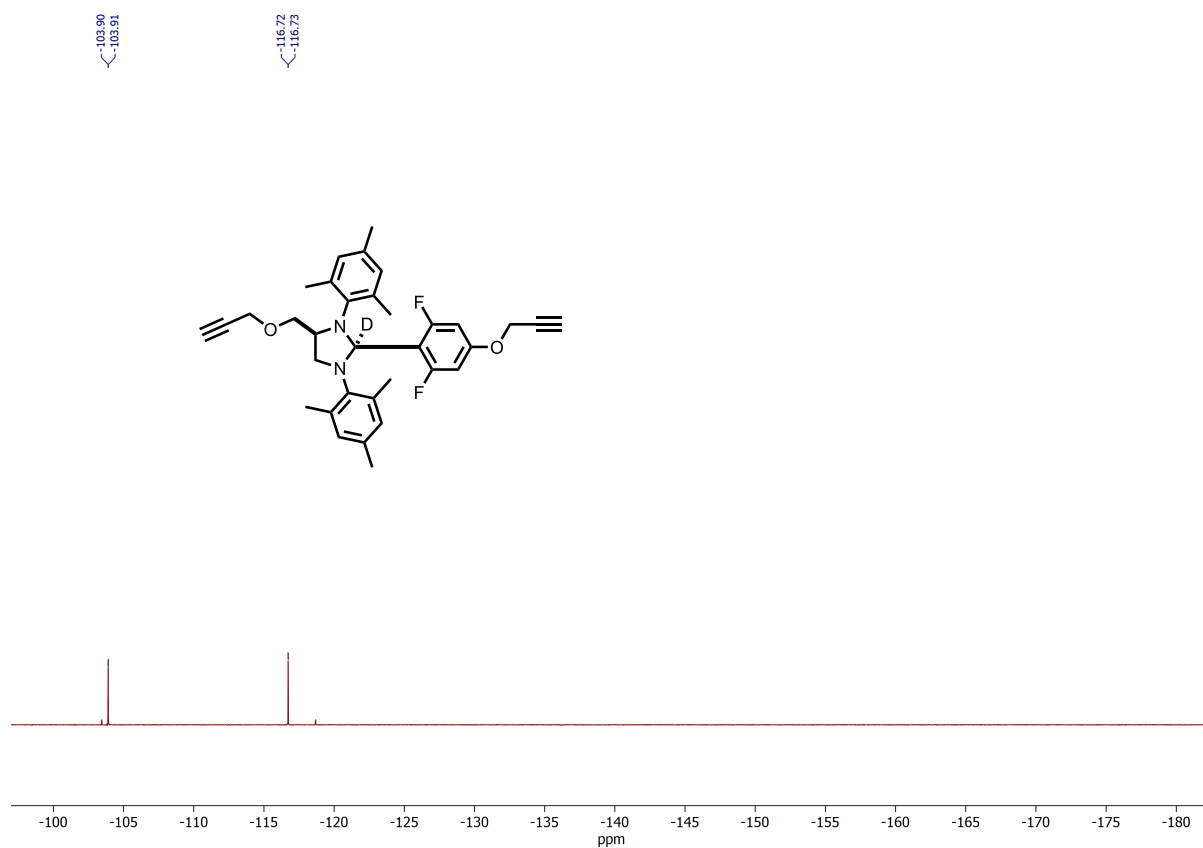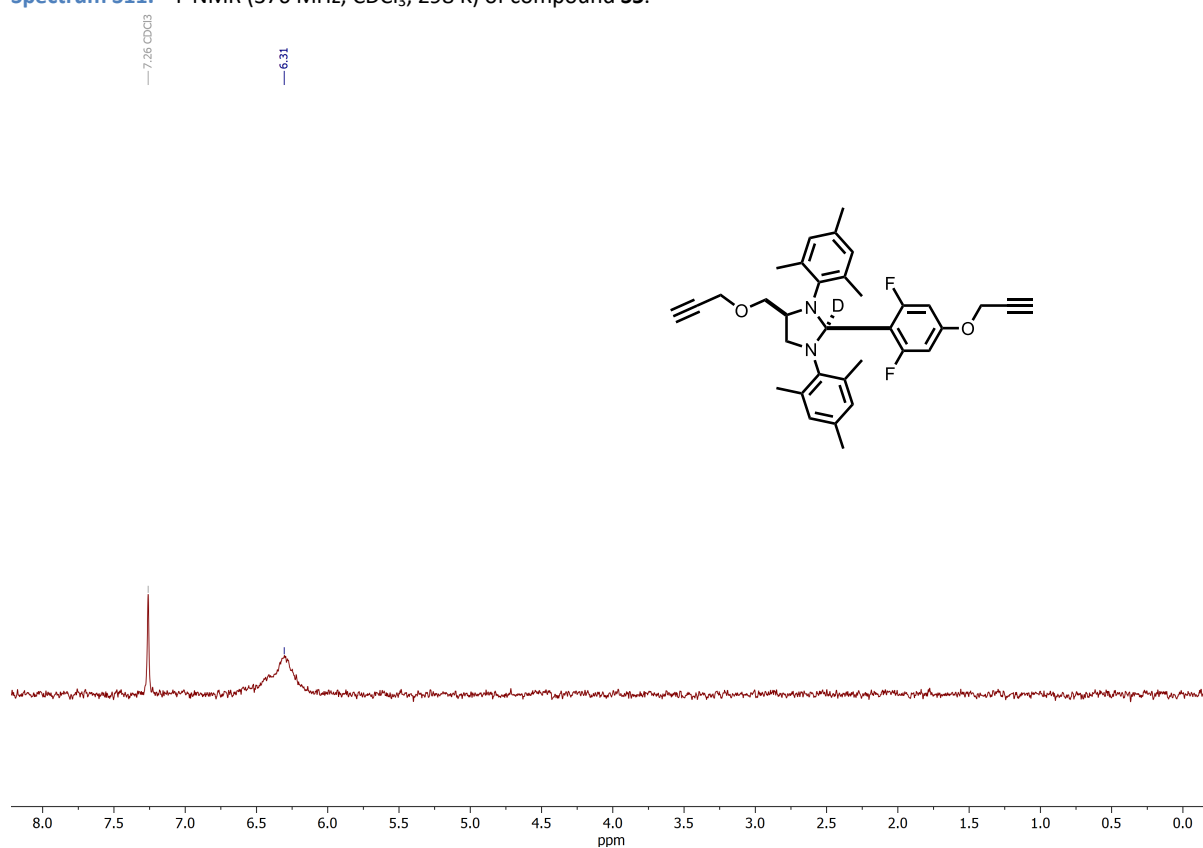

## 5.4 Spectra of S6

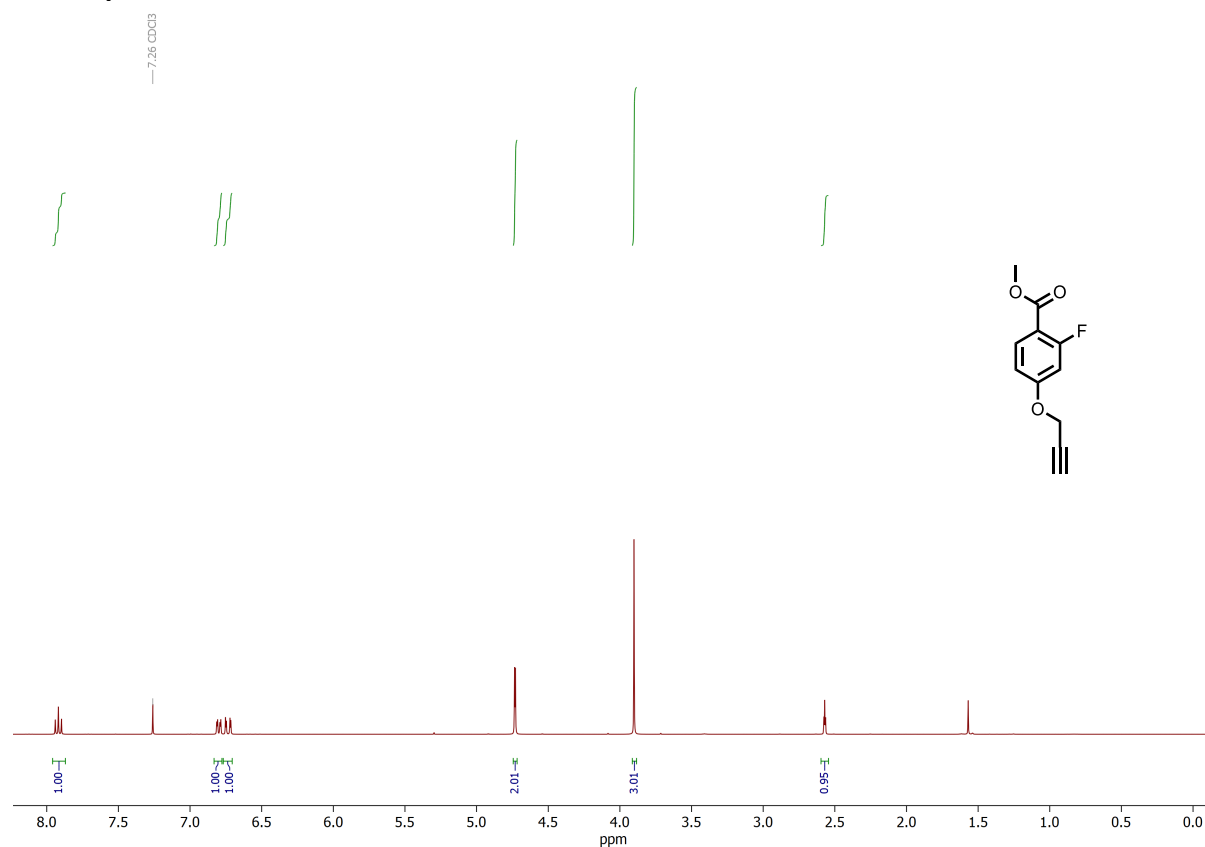

**Spectrum S13.** <sup>1</sup>H NMR (500 MHz, CDCl<sub>3</sub>, 298 K) of compound S6.

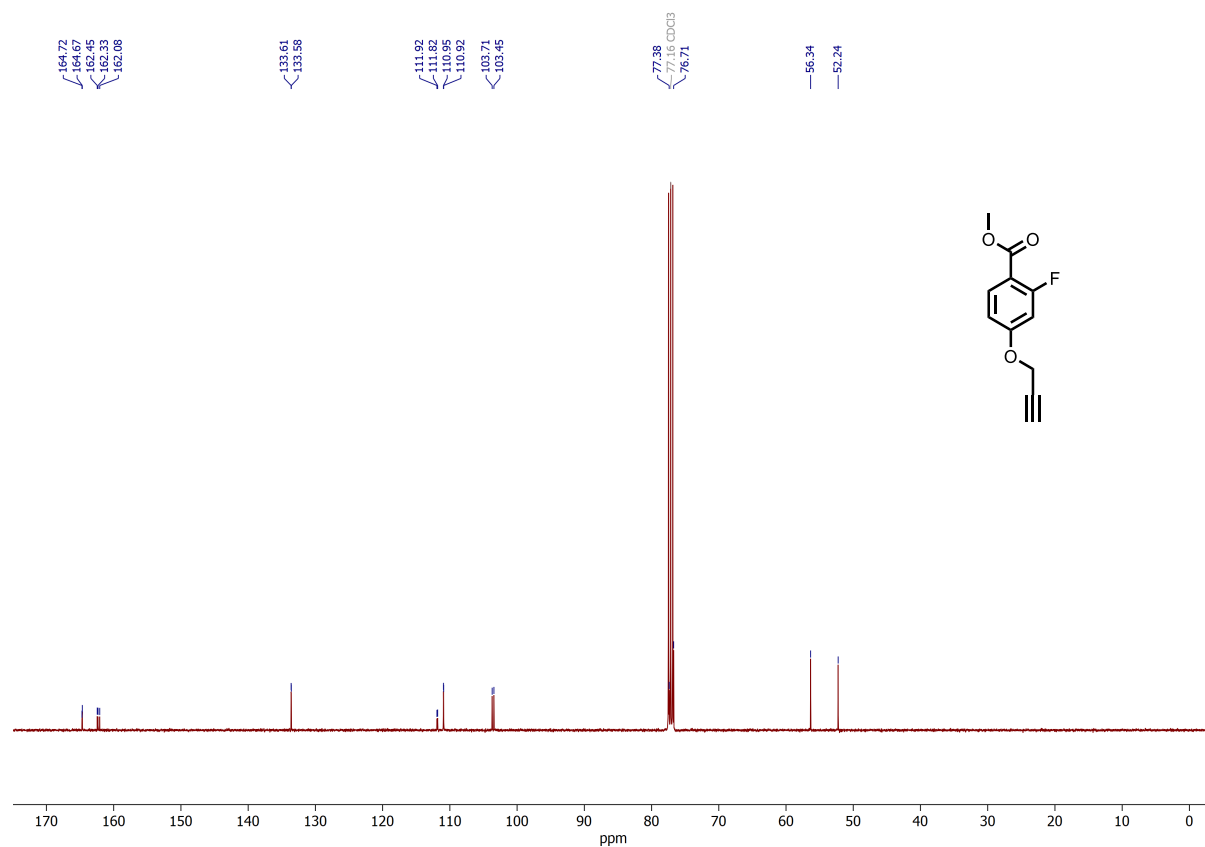

**Spectrum S14.** <sup>13</sup>C NMR (126 MHz, CDCl<sub>3</sub>, 298 K) of compound S6.

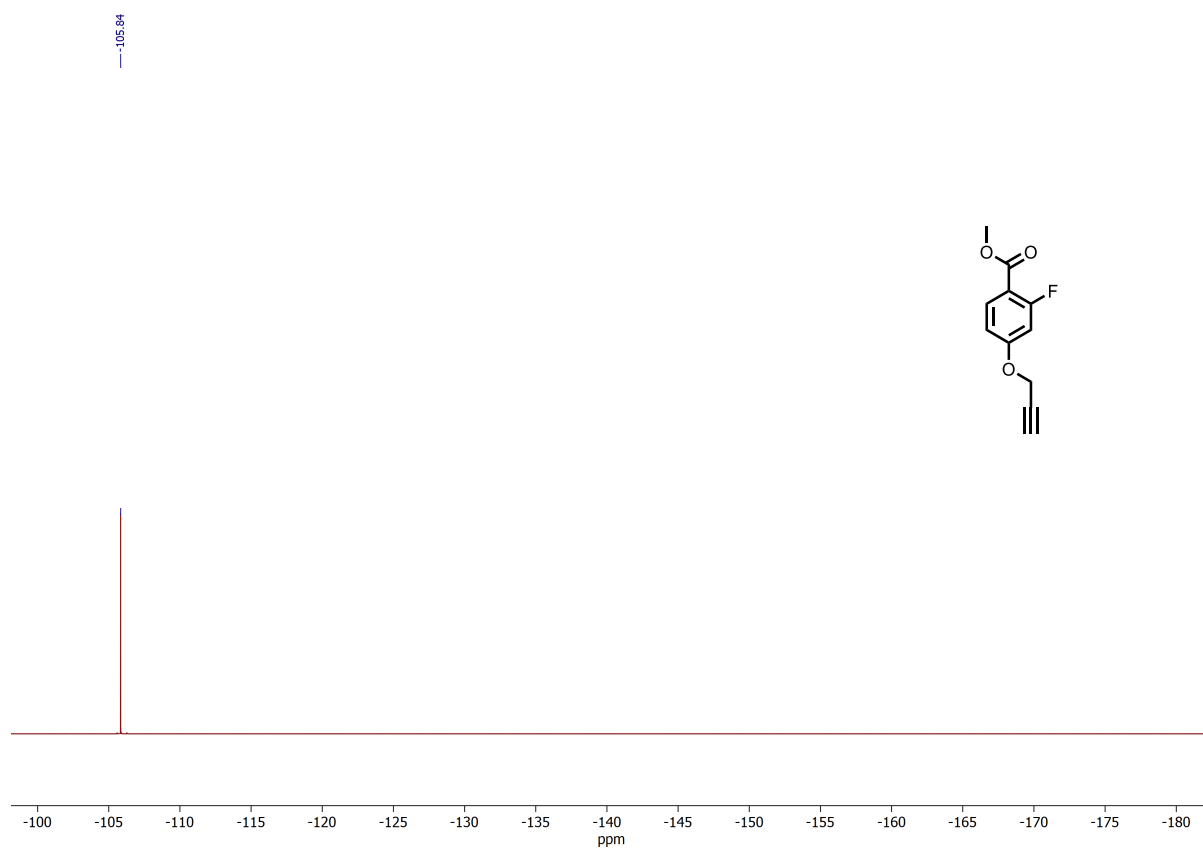

**Spectrum S15.** <sup>19</sup>F NMR (376 MHz, CDCl<sub>3</sub>, 298 K) of compound **S6**.

## 5.5 Spectra of S7

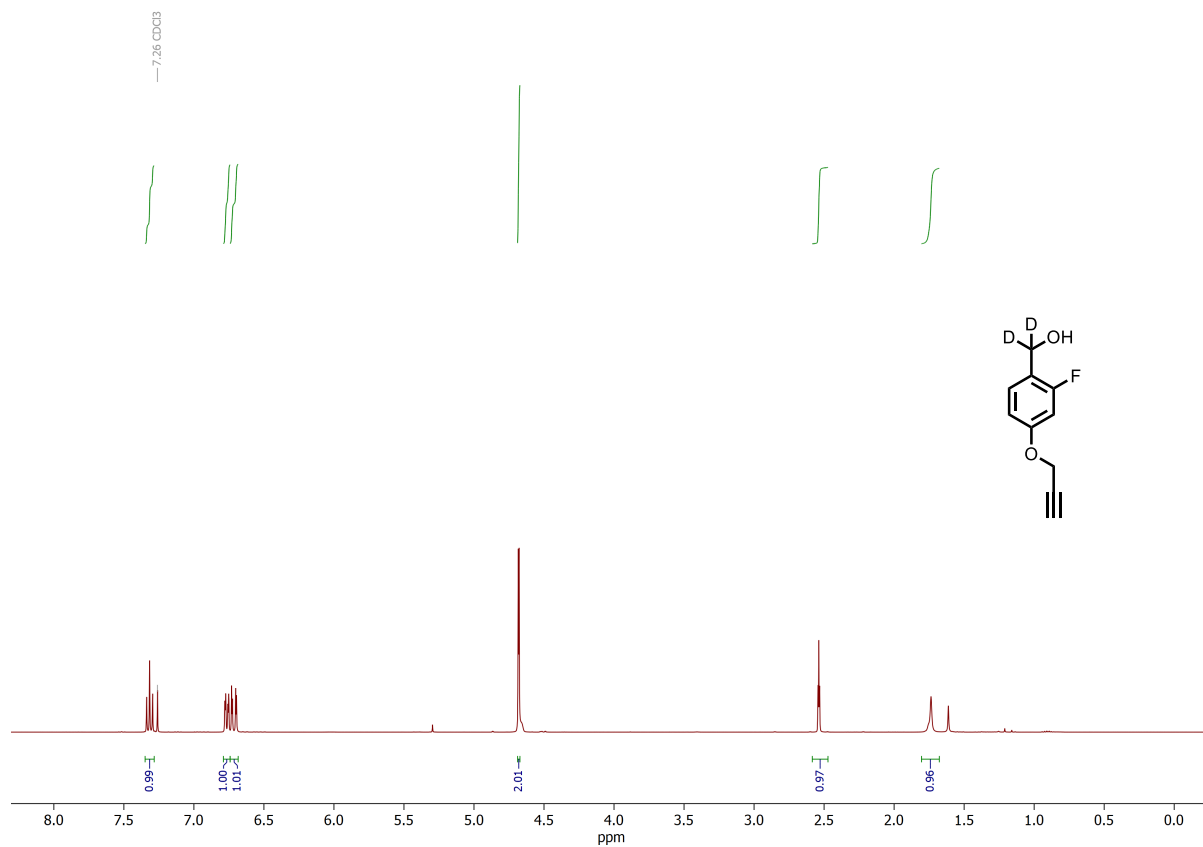

**Spectrum S16.** <sup>1</sup>H NMR (400 MHz, CDCl<sub>3</sub>, 298 K) of compound **S7**.

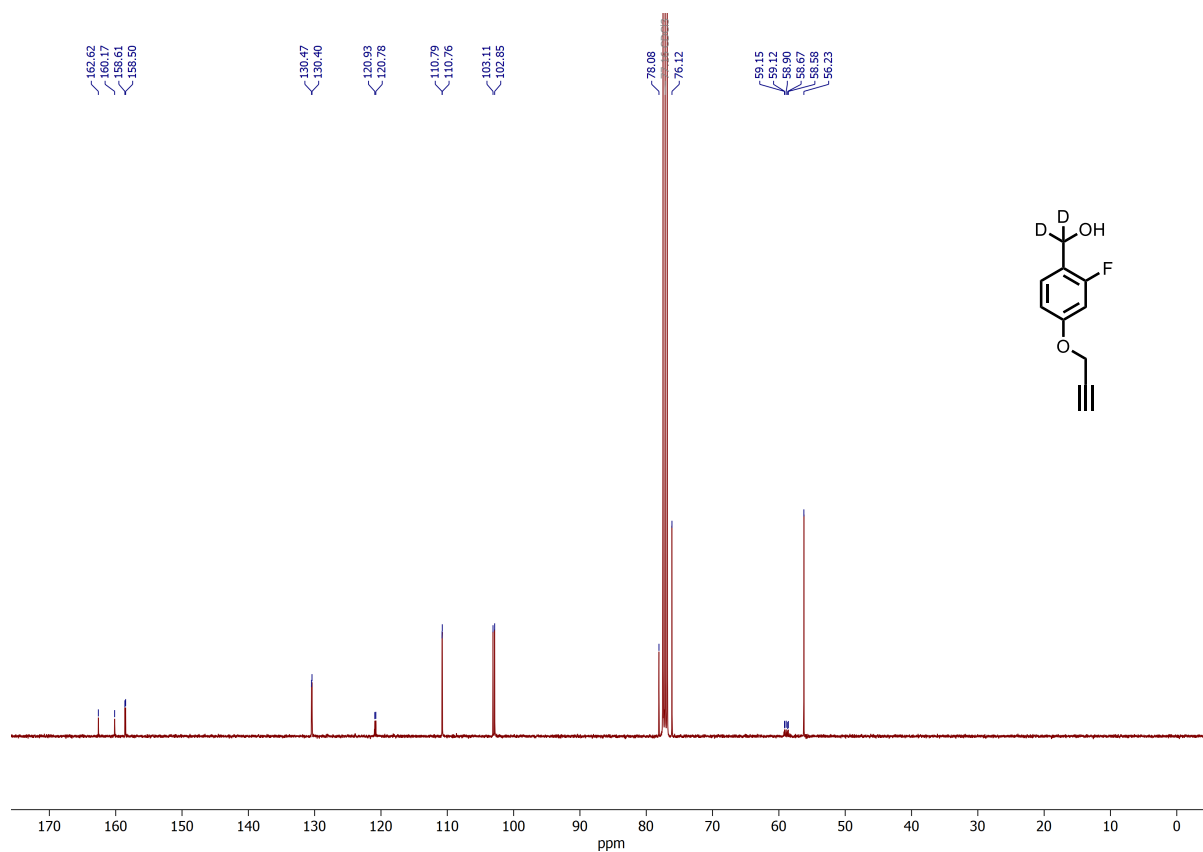

**Spectrum S17.**  $^{13}\text{C}$  NMR (101 MHz,  $\text{CDCl}_3$ , 298 K) of compound **S7**.

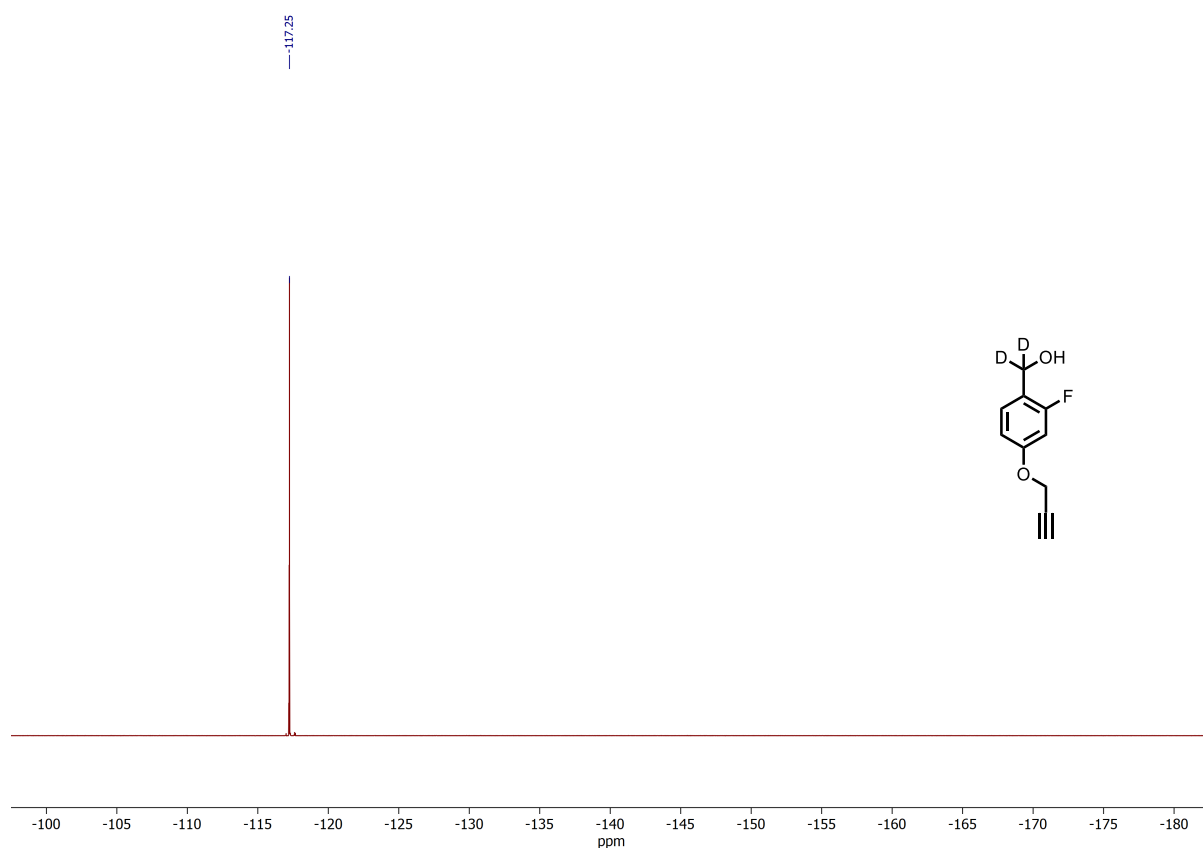

**Spectrum S18.**  $^{19}\text{F}$  NMR (376 MHz,  $\text{CDCl}_3$ , 298 K) of compound **S7**.

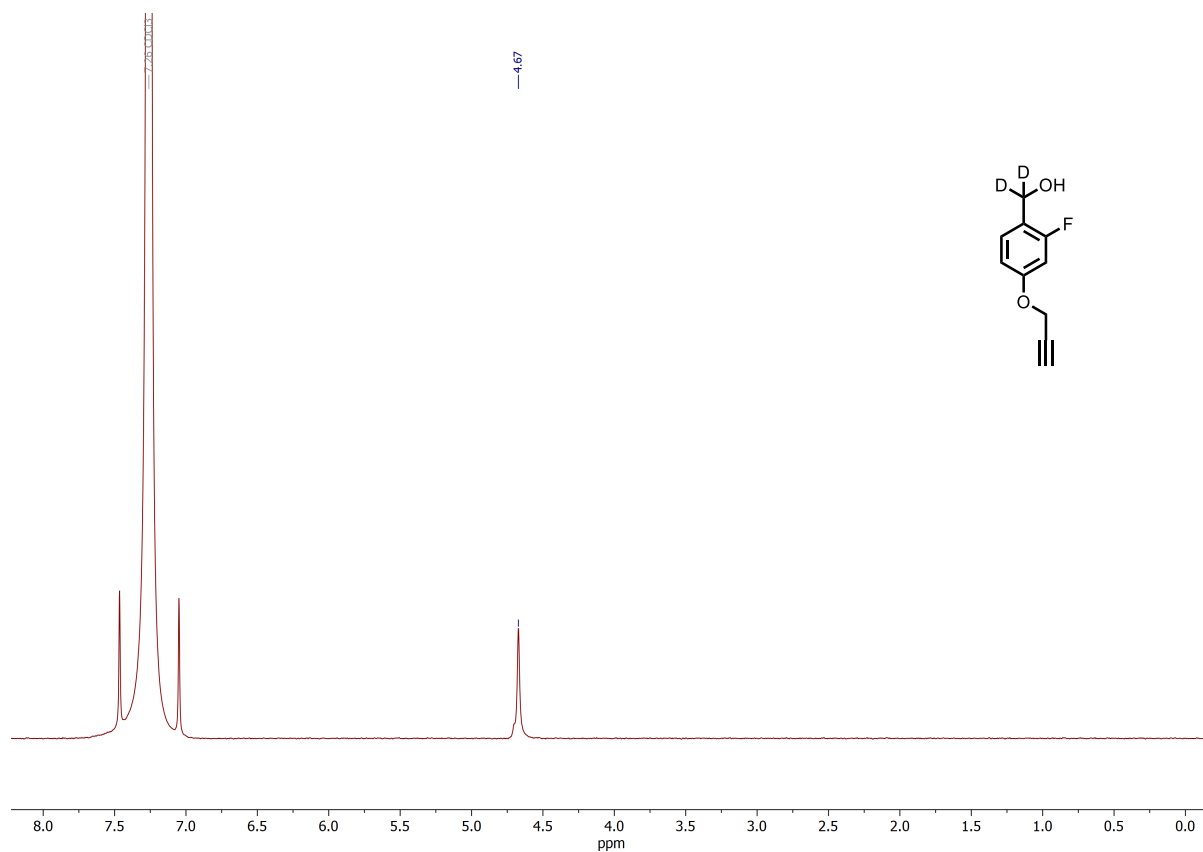

**Spectrum S19.**  $^2\text{H}$  NMR (77 MHz,  $\text{CHCl}_3$ , 298 K) of compound **57**.

## 5.6 Spectra of S8

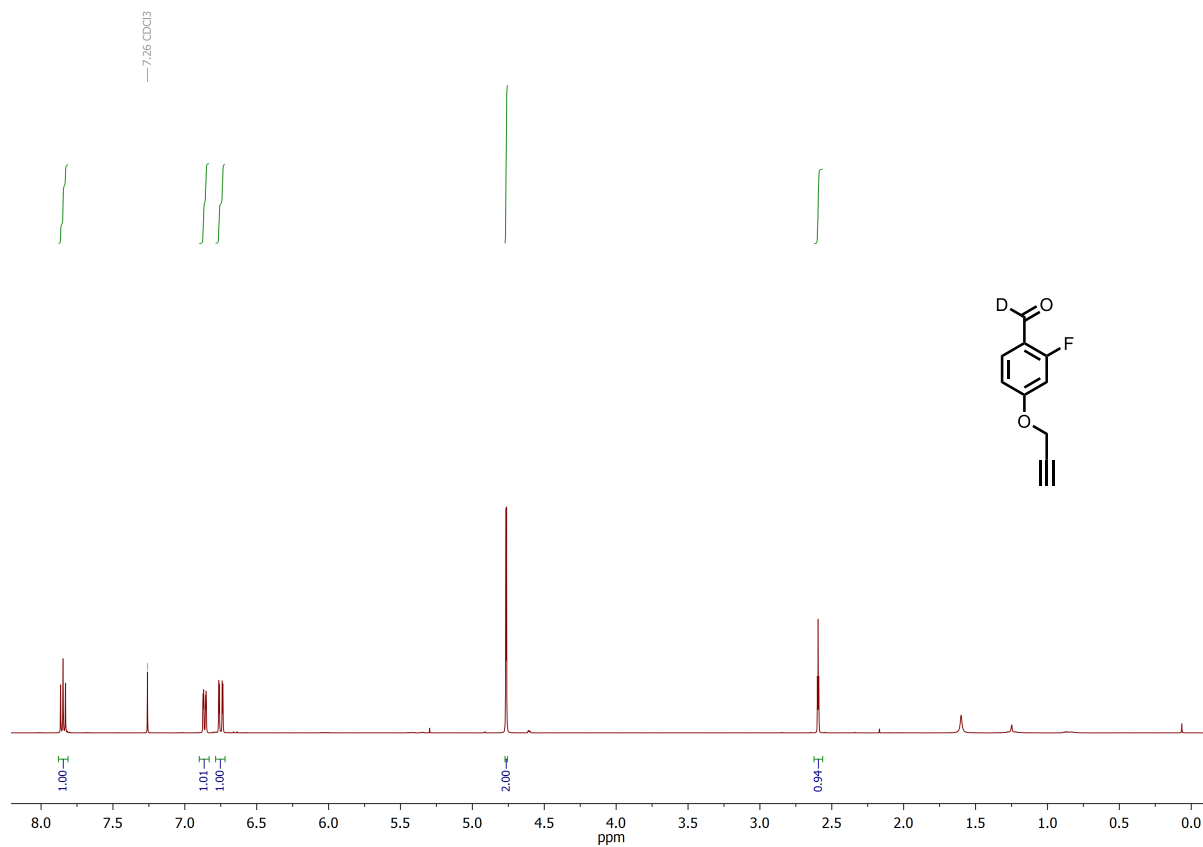

**Spectrum S20.**  $^1\text{H}$  NMR (500 MHz,  $\text{CDCl}_3$ , 298 K) of compound **58**.



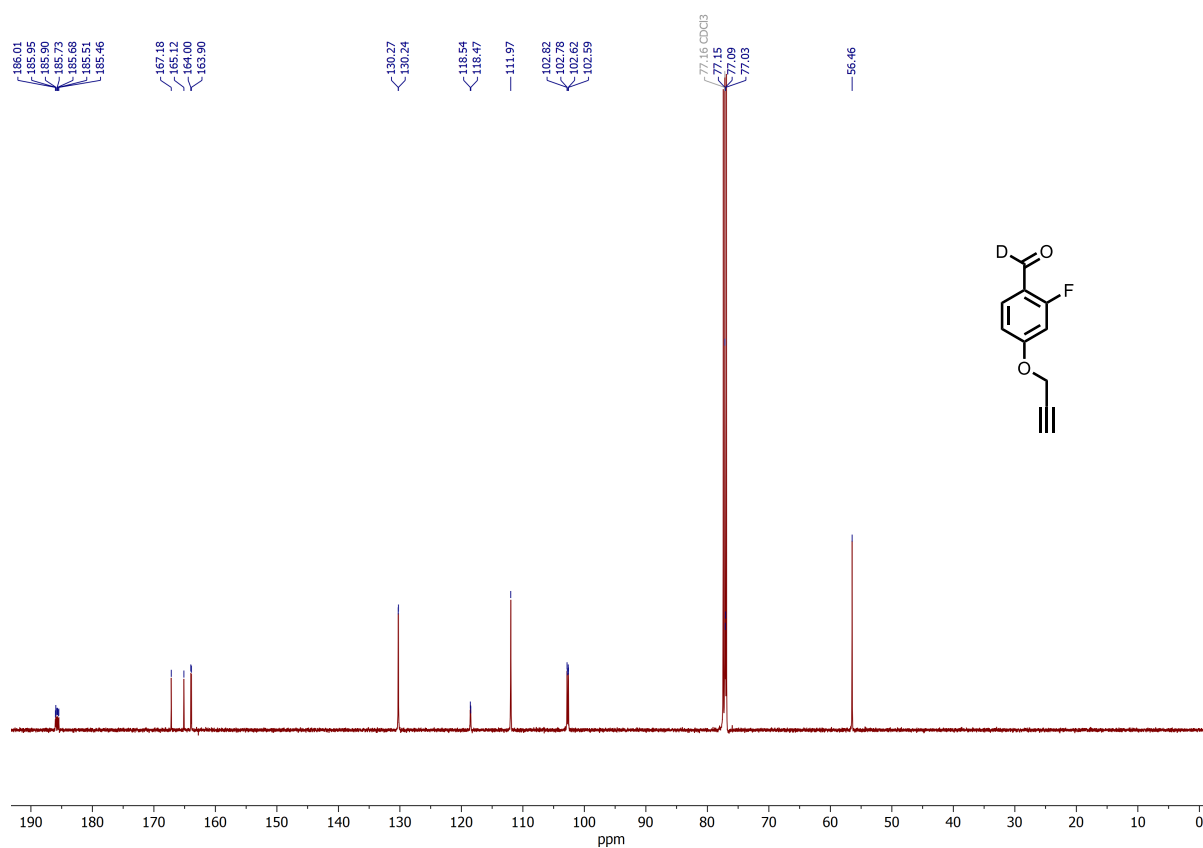

**Spectrum S21.** <sup>13</sup>C NMR (126 MHz, CDCl<sub>3</sub>, 298 K) of compound **S8**.

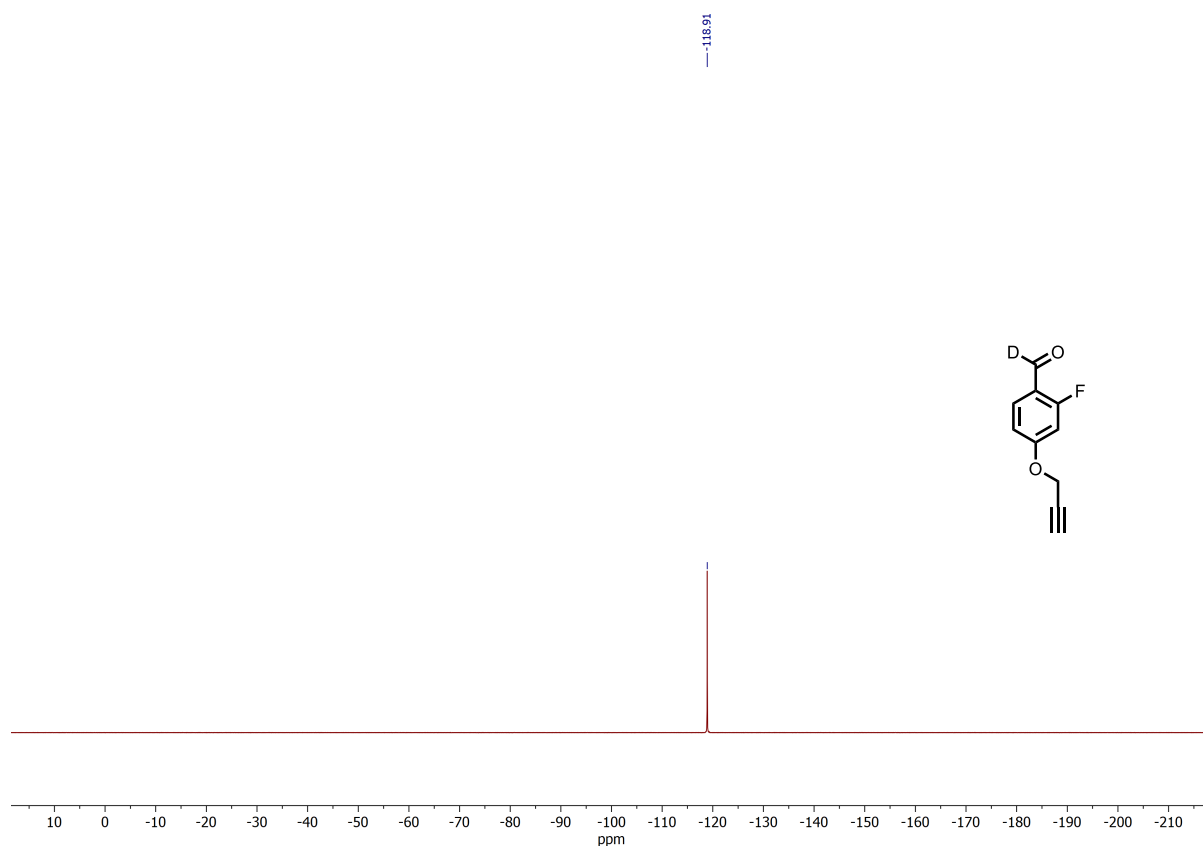

**Spectrum S22.** <sup>19</sup>F NMR (376 MHz, CDCl<sub>3</sub>, 298 K) of compound **S8**.

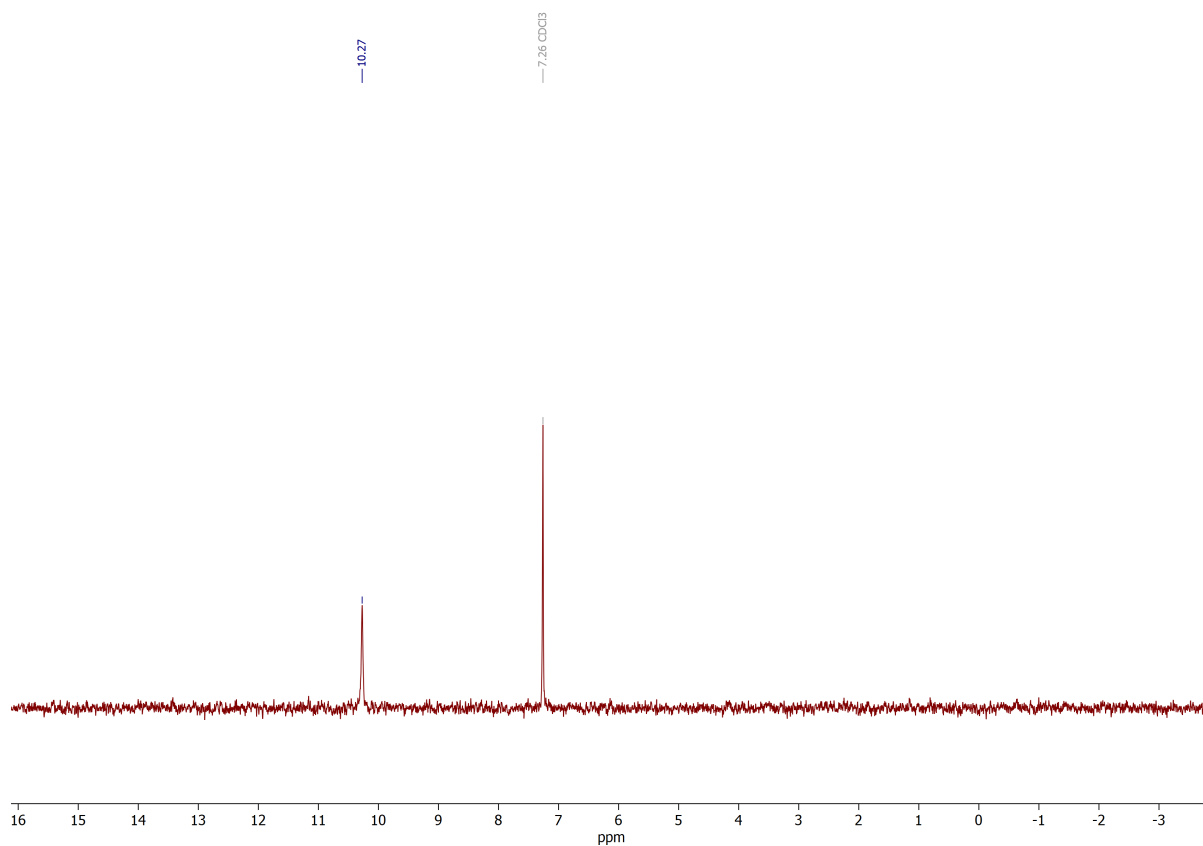

**Spectrum S23.** <sup>2</sup>H NMR (77 MHz, CHCl<sub>3</sub>, 298 K) of compound **58**.

## 5.7 Spectra of S9

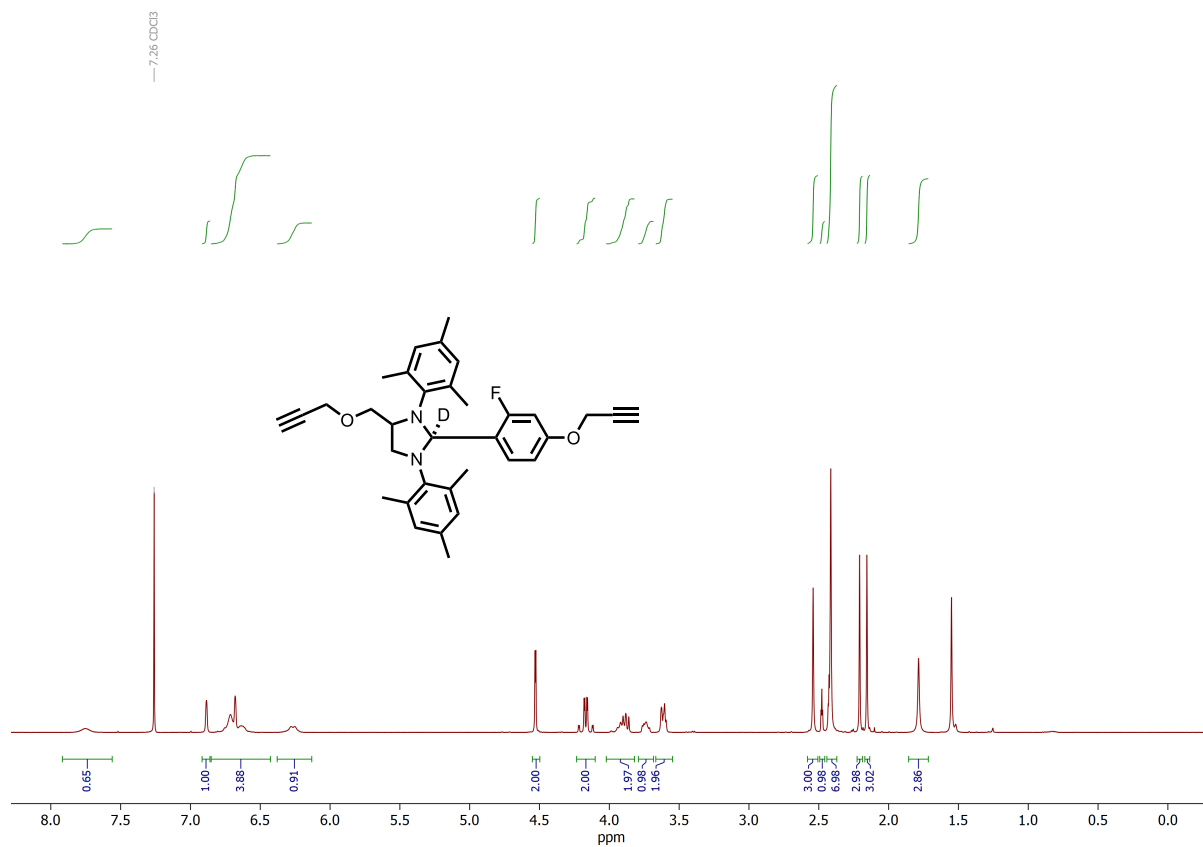

**Spectrum S24.** <sup>1</sup>H NMR (500 MHz, CDCl<sub>3</sub>, 298 K) of compound **S9**.

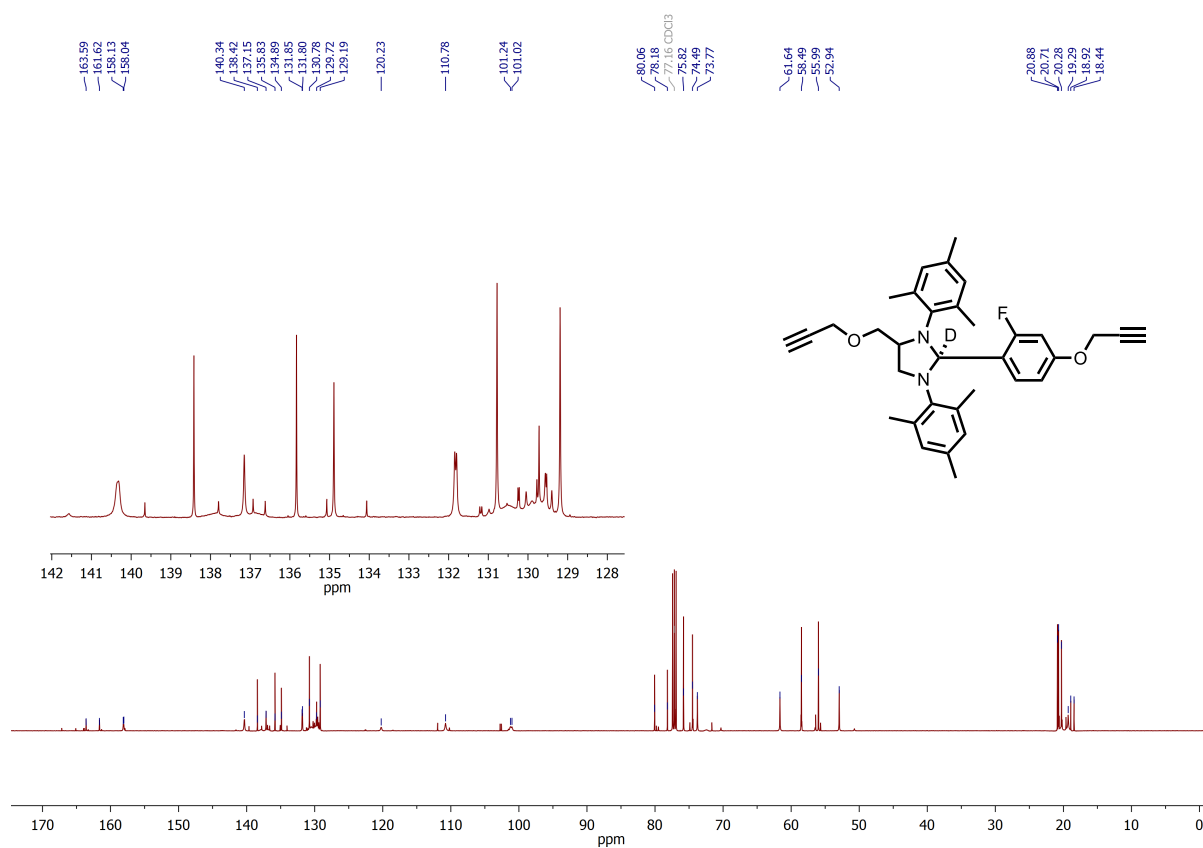

**Spectrum S25.** <sup>13</sup>C NMR (126 MHz, CDCl<sub>3</sub>, 298 K) of compound **S9**.

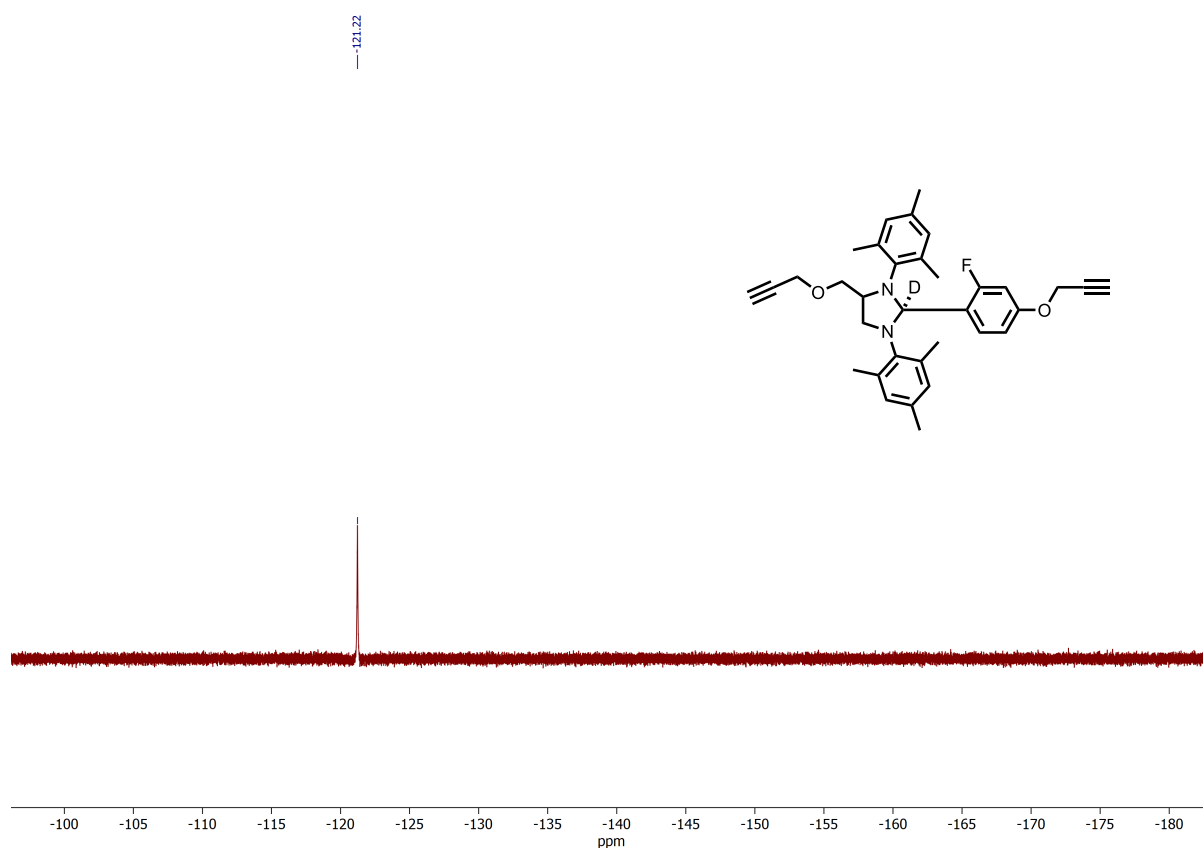

**Spectrum S26.** <sup>19</sup>F NMR (376 MHz, CDCl<sub>3</sub>, 298 K) of compound **S9**.

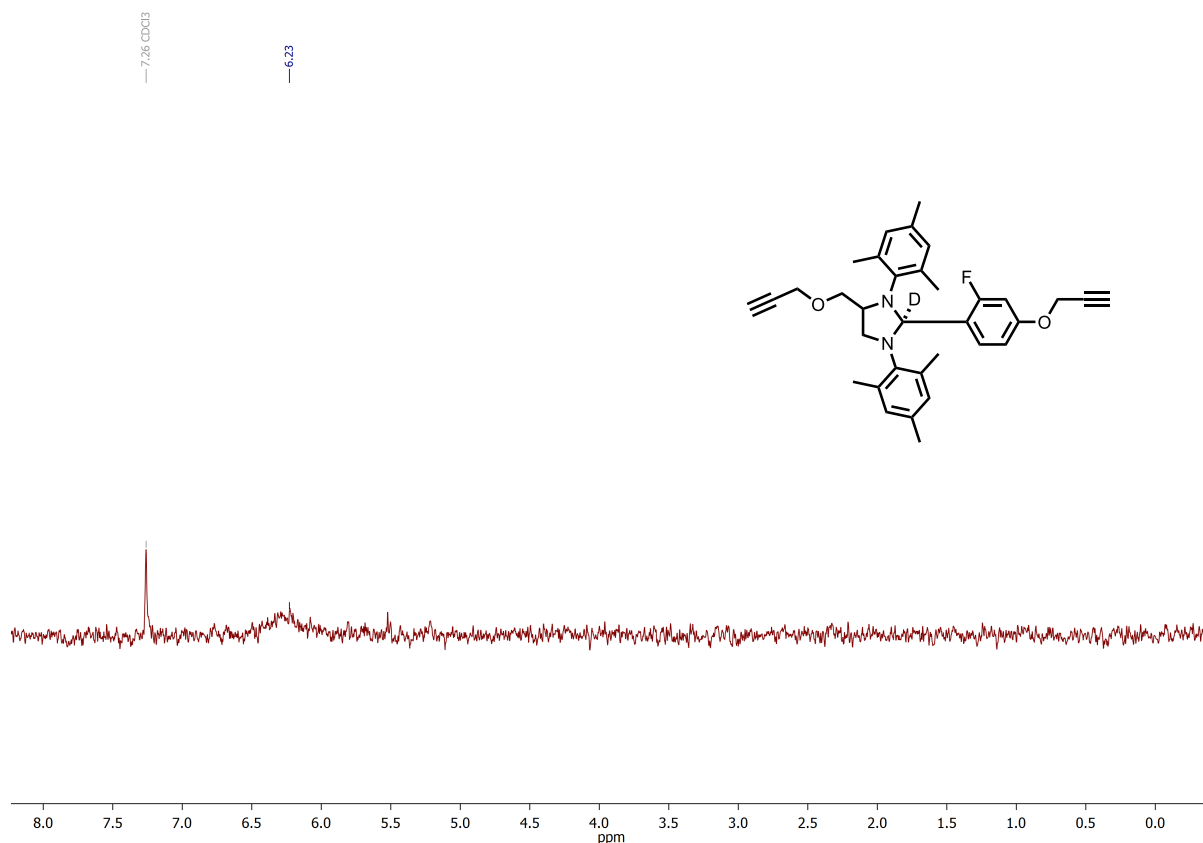

## 5.8 Spectra of **1<sub>D</sub>b**

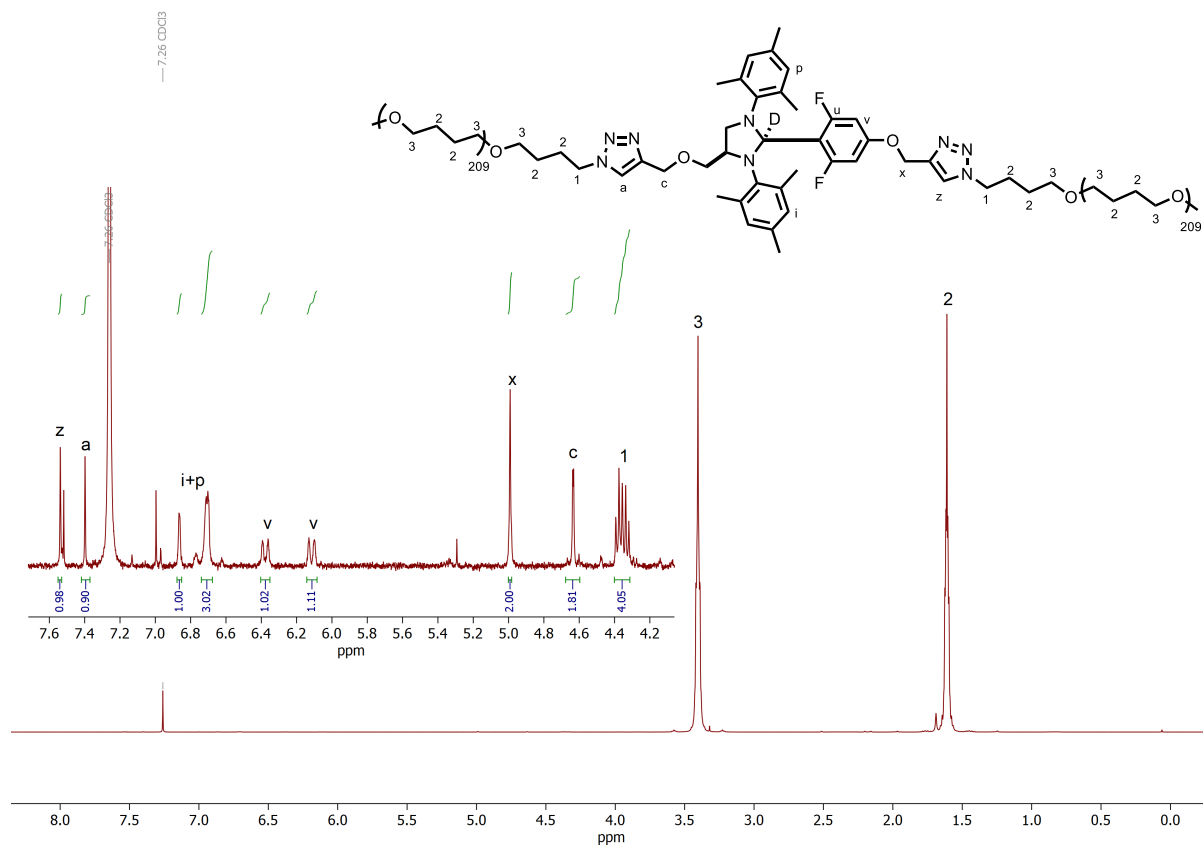

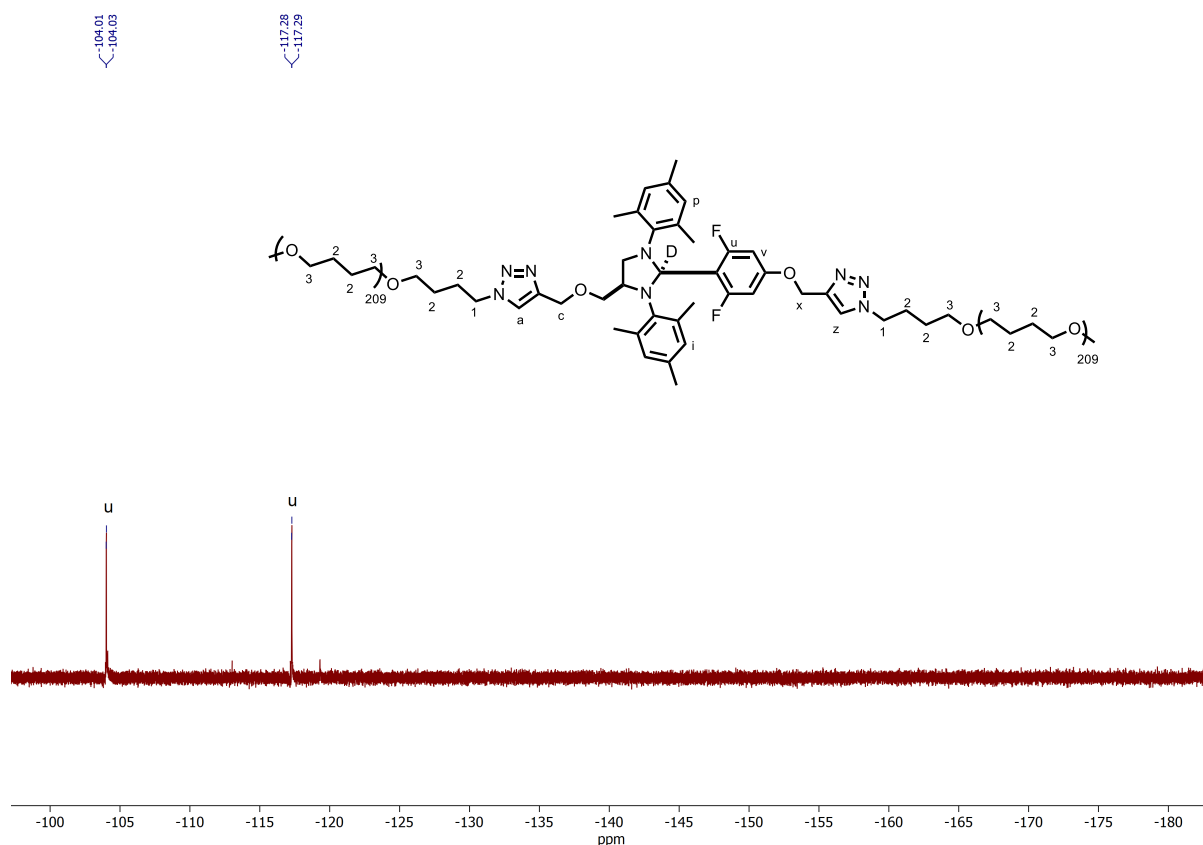

## 5.9 Spectra of **1dc**

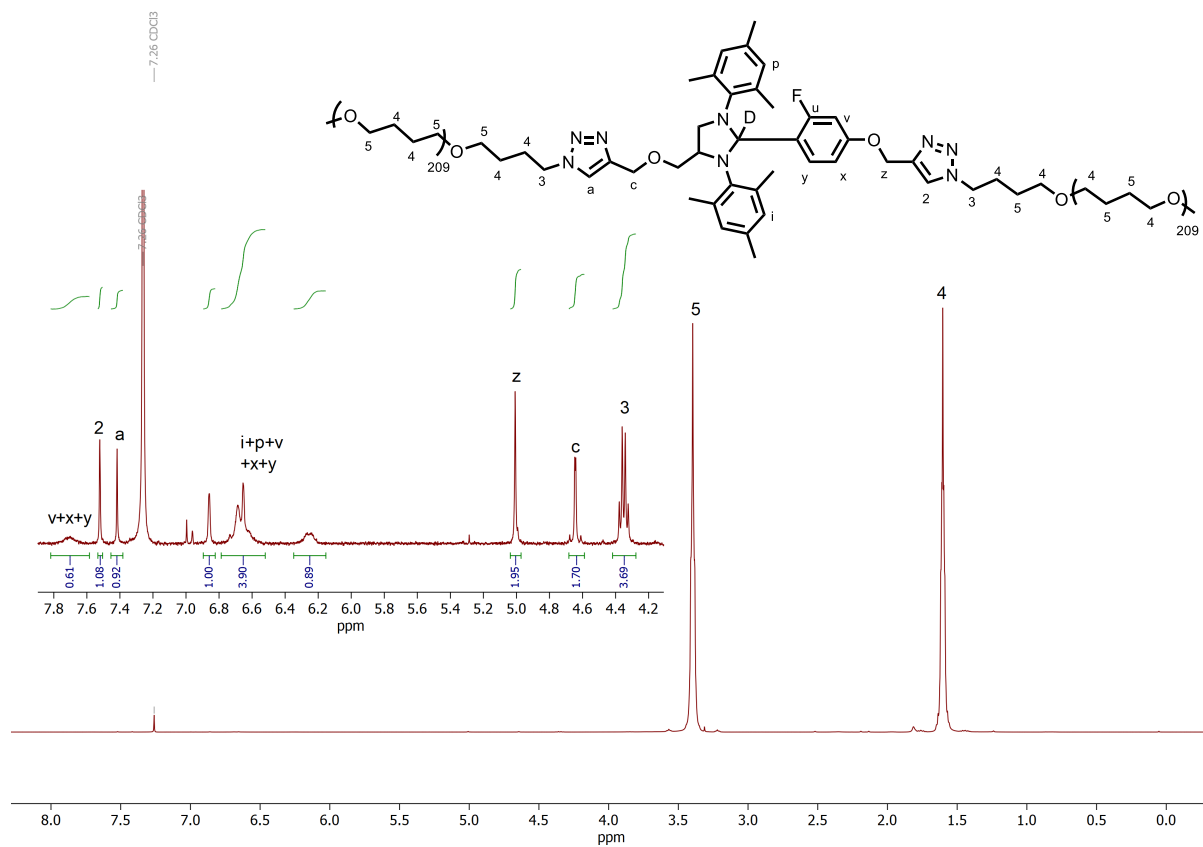

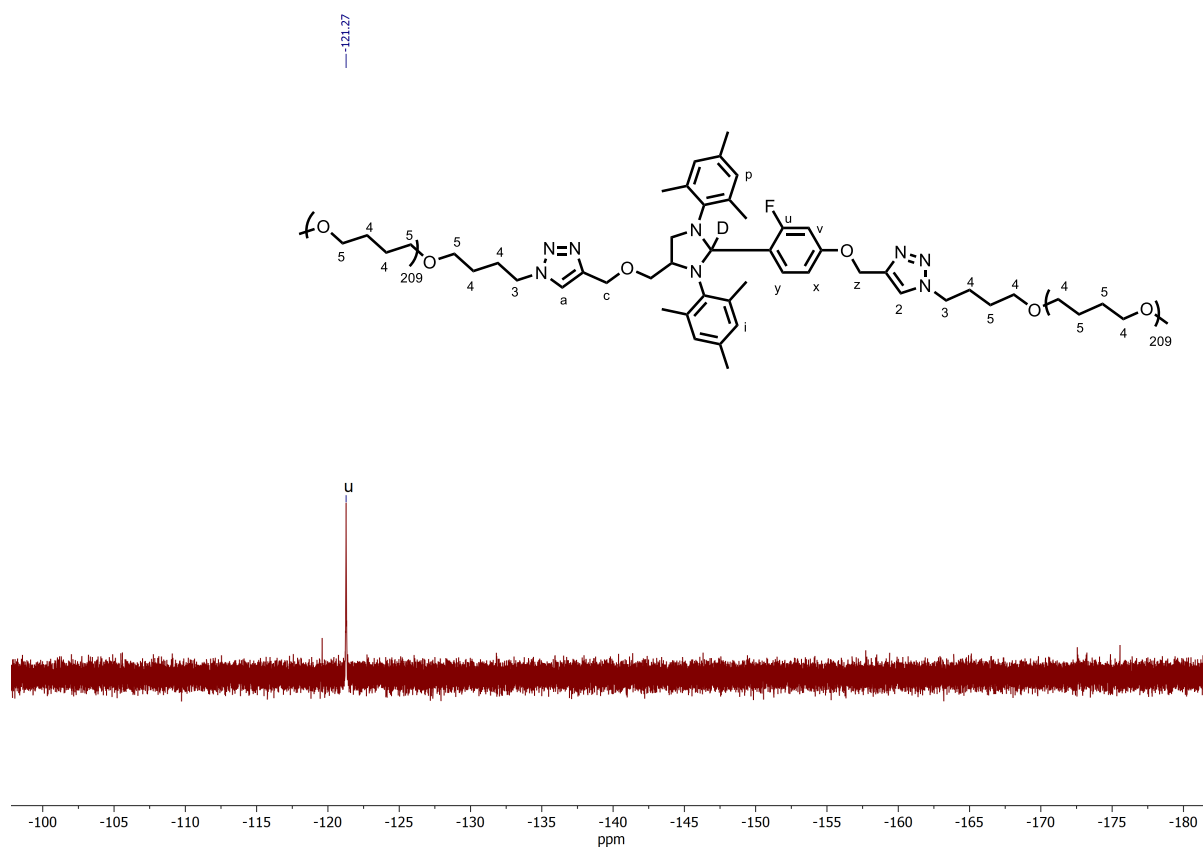

## 6 Sonication Experiments

All experiments were carried out using the same sonication conditions (20 KHz, 15.6 W cm<sup>-2</sup>, 1 s ON / 1 s OFF, 5 – 10 °C). Some experiments previously reported by us,<sup>1</sup> are marked with the corresponding reference and reproduced here to give a complete picture of the mechanophores' reactivity.

### 6.1 Standard Sonication Procedure

The desired polymer (45 mg) was dissolved in the specified solvent mixture (approx. 15 mL) and added to a modified Suslick cell. Nitrogen was gently bubbled through the solution as it was sonicated. After 180 min of sonication time, the mixture was undisturbed for 24 h to allow metal impurities to settle to the bottom of the cell. The solution was then carefully decanted to remove such impurities and condensed to give the crude polymer. After drying under high vacuum for an extended period of time (approximately 24 h), the polymer was washed with acetonitrile (5 mL) before drying again. The ratio of protonated and deuterated fluoroaryl species was determined by <sup>19</sup>F NMR.

### 6.2 Sonication Experiments Overview

Both the protonated and deuterated analogues of polymers **1<sub>xa</sub>**, **1<sub>xb</sub>**, and **1<sub>xc</sub>** were subjected to a series of sonication experiments with varying sources of deuterium present in order to determine the extent of the three potential pathways of cleavage: heterolytic, concerted, and homolytic.

In the case of the protonated analogues, sonication in THF along with added D<sub>2</sub>O reveals the extent of heterolytic cleavage while sonication in THF-d<sub>8</sub>, with benzene making up the remaining solvent, with added H<sub>2</sub>O reveals the extent of homolytic cleavage; the extent of concerted cleavage can then be deduced from the difference between the two.

For the deuterated analogues, sonication in THF with added H<sub>2</sub>O reveals the extent of concerted cleavage while sonication in THF with added D<sub>2</sub>O reveals the extent of homolytic cleavage; the extent of heterolytic cleavage can be deduced from the difference between the two. A summary of the results observed can be seen in *Table S2* below.

**Table S2.** Summary of observed pathways of mechanical cleavage for mechanophore-containing polymers **1<sub>xa</sub>**, **1<sub>xb</sub>**, and **1<sub>xc</sub>** deduced through various sonication experiments. n.o. = not observed. Error: ±1 %

| <i>Polymer</i>        | <i>% Heterolytic</i> | <i>% Concerted</i> | <i>% Homolytic</i> |
|-----------------------|----------------------|--------------------|--------------------|
| <b>1<sub>Ha</sub></b> | 68                   | 27                 | 5                  |
| <b>1<sub>Da</sub></b> | 70                   | 24                 | 6                  |
| <b>1<sub>Hb</sub></b> | 45                   | 55                 | n.o.               |
| <b>1<sub>Db</sub></b> | 71                   | 26                 | 3                  |
| <b>1<sub>Hc</sub></b> | 25                   | 75                 | n.o.               |
| <b>1<sub>Dc</sub></b> | 58                   | 39                 | 3                  |

### 6.2.1 Sonication Experiments of Polymers **1<sub>Ha</sub>** and **1<sub>Da</sub>**<sup>1</sup>

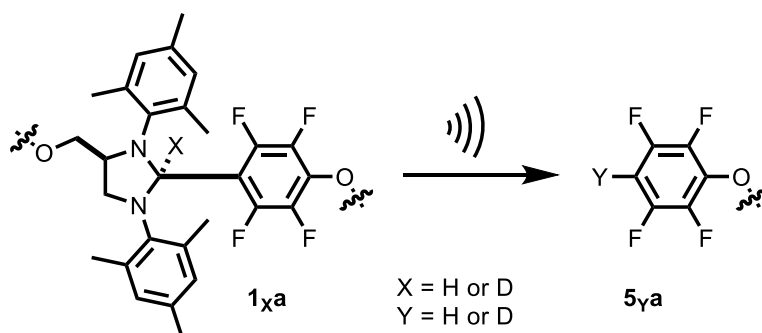

**Scheme S3.** The mechanical activation of polymer **1<sub>xa</sub>** via sonication leads to the formation of a tetrafluorobenzene structure that can be either protonated or deuterated with the ratio of these species depending on the conditions used.

**Table S3.** Summary of sonication experiments carried out using **1<sub>Ha</sub>** and **1<sub>Da</sub>** in various solvent systems along with the resulting ratio of protonated and deuterated tetrafluorobenzene species (**5<sub>ya</sub>**, where the position of Y is shown above in *Scheme S3*) formed. Error:  $\pm 1\%$

| Entry | Polymer               | Solvent Composition                                         | <b>5<sub>Ha</sub></b> : <b>5<sub>Da</sub></b> |
|-------|-----------------------|-------------------------------------------------------------|-----------------------------------------------|
| 1     | <b>1<sub>Ha</sub></b> | THF/H <sub>2</sub> O (15 : 0.2)                             | 100 : 0                                       |
| 2     | <b>1<sub>Ha</sub></b> | THF/D <sub>2</sub> O (15 : 0.2)                             | 32 : 68                                       |
| 3     | <b>1<sub>Ha</sub></b> | THF-d <sub>8</sub> /benzene/H <sub>2</sub> O (1 : 14 : 0.2) | 95 : 5                                        |
| 4     | <b>1<sub>Da</sub></b> | THF/H <sub>2</sub> O (15 : 0.2)                             | 76 : 24                                       |
| 5     | <b>1<sub>Da</sub></b> | THF/D <sub>2</sub> O (15 : 0.2)                             | 6 : 94                                        |

For polymer **1<sub>Ha</sub>**, sonication in THF and D<sub>2</sub>O (*Table S3, Entry 2*) revealed the extent of heterolytic cleavage to be 68% while sonication in THF-d<sub>8</sub>, benzene, and H<sub>2</sub>O (*Table S3, Entry 3*) showed just 5% of cleavage to be homolytic; this leaves the concerted pathway to make up the remaining ~27%. An additional experiment was carried out where **1<sub>Ha</sub>** was sonicated in THF and H<sub>2</sub>O (*Table S3, Entry 1*) to demonstrate sole formation of the protonated tetrafluorobenzene.

For polymer **1<sub>Da</sub>**, sonication in THF and H<sub>2</sub>O (*Table S3, Entry 4*) revealed the extent of concerted cleavage to be 24% while sonication in THF and D<sub>2</sub>O (*Table S3, Entry 5*) showed 6% of cleavage to be homolytic leaving the heterolytic pathway to make up the remaining ~70%. As the deuteration of polymer **1<sub>Da</sub>** is not 100% (approximately 98% D in the precursor small molecule mechanophore) the small amount of **1<sub>Ha</sub>** present must be taken into account. For the experiment shown in *Table S3, Entry 4*, 100% of **1<sub>Ha</sub>** cleavage events will have led to **5<sub>Ha</sub>** meaning the percentage of **5<sub>ya</sub>** that was actually protonated was 75.5%. Similar treatment for the experiment of *Table S3, Entry 5* reveals the true extent of **5<sub>Ha</sub>** formed was 5.5%. The difference this analysis makes to the results here is essentially negligible.

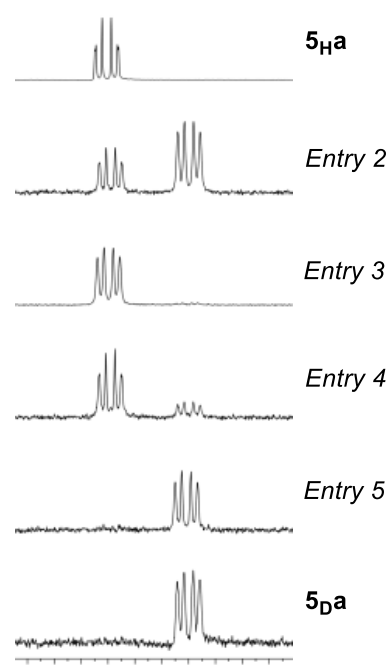

**Figure S1.** <sup>1</sup>H NMR (376 MHz, C<sub>6</sub>D<sub>6</sub>, 298 K) spectra showing the ratio of **5<sub>Ha</sub>** to **5<sub>Da</sub>** present in the post-sonication polymers reported in *Table S3*.



These results show how polymer **1<sub>x</sub>a** demonstrates similar extents of each cleavage mechanism regardless of whether it is protonated or deuterated adjacent to the scissile bond.

It is worth mentioning that in some of the  $^{19}\text{F}$  NMR spectra of post-sonication samples involving polymer **1<sub>H</sub>a** there are unidentified peaks present at -153.7 and -170.2 ppm. A repeat of one of these experiments using a different sample demonstrates no such presence of this species (*Figure S8*) while retaining the ratio of protonated and deuterated **5<sub>y</sub>a** species. A similar result can be observed when the same sample of **1<sub>H</sub>a** is sonicated with methanol- $\text{d}_4$  instead of  $\text{D}_2\text{O}$  (*Figure S9*). This shows that the unidentified peaks are the result of a species that is not involved in the mechanochemical activation of mechanophore **1<sub>x</sub>a** and is likely a simple impurity present in the particular sample discussed here.

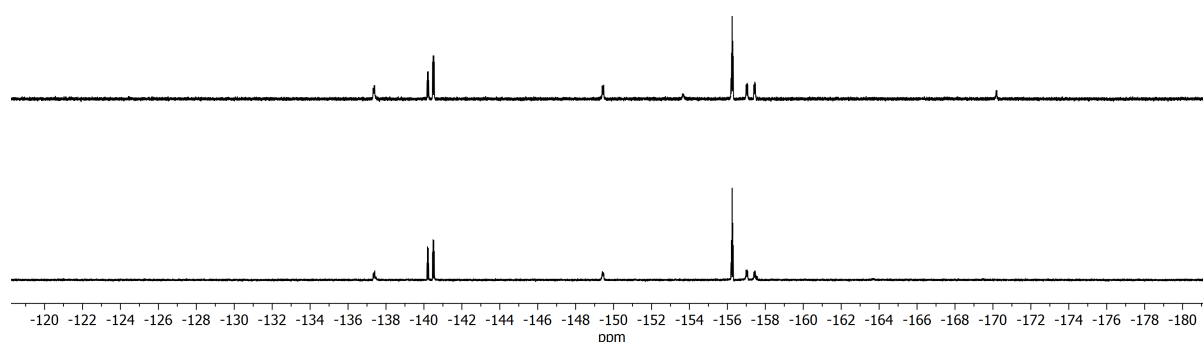

**Figure S8.**  $^{19}\text{F}$  NMR spectra showing (top) the sample of **1<sub>H</sub>a** used elsewhere throughout this work and (bottom) an alternative sample of **1<sub>H</sub>a**, both after 180 min of sonication in THF (15 mL) with added  $\text{D}_2\text{O}$  (0.2 mL). The top spectrum shows 68% of the resulting tetrafluorobenzene species are deuterated while the bottom spectrum shows 69%.

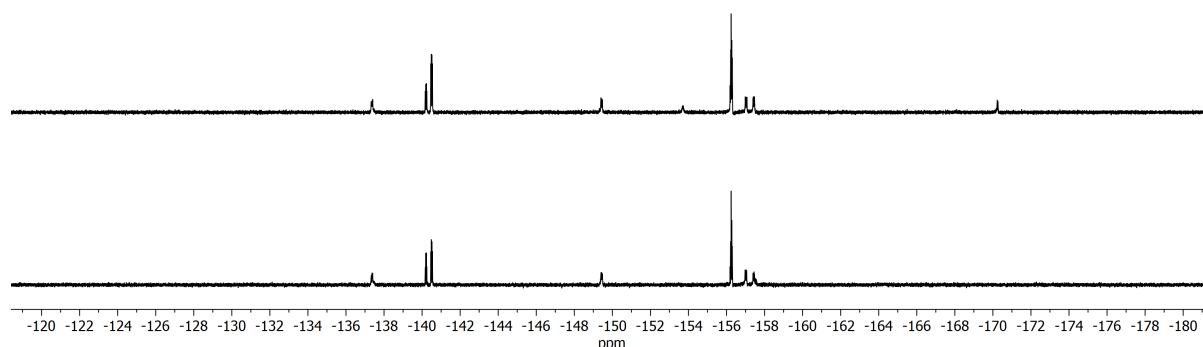

**Figure S9.**  $^{19}\text{F}$  NMR spectra showing (top) the sample of **1<sub>H</sub>a** used elsewhere throughout this work and (bottom) an alternative sample of **1<sub>H</sub>a**, both after 180 min of sonication in THF (15 mL) with added methanol- $\text{d}_4$  (0.2 mL). The top spectrum shows 72% of the resulting tetrafluorobenzene species are deuterated while the bottom spectrum shows 70%.

### 6.2.2 Sonication Experiments of Polymers **1<sub>Hb</sub>** and **1<sub>Db</sub>**

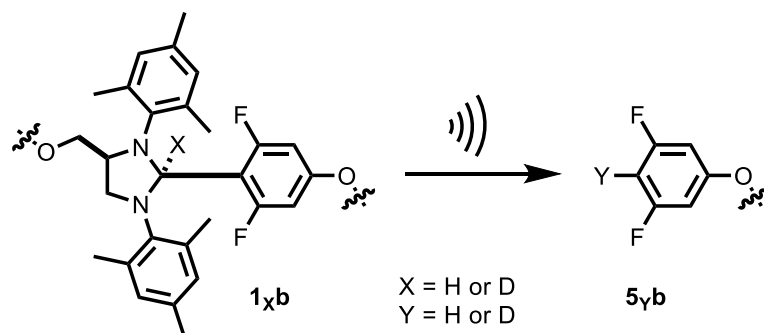

**Scheme S4.** The mechanical activation of polymer **1<sub>x</sub>b** via sonication leads to the formation of a difluorobenzene structure that can be either protonated or deuterated with the ratio of these species depending on the conditions used.

**Table S4.** Summary of sonication experiments carried out using **1<sub>Hb</sub>** and **1<sub>Db</sub>** in various solvent systems along with the resulting ratio of protonated and deuterated difluorobenzene species (**5<sub>y</sub>b**, where the position of Y is shown above in *Scheme S4*) formed. Error:  $\pm 1\%$ .

| Entry          | Polymer               | Solvent Composition                                                 | <b>5<sub>Hb</sub></b> : <b>5<sub>Db</sub></b> |
|----------------|-----------------------|---------------------------------------------------------------------|-----------------------------------------------|
| 1 <sup>1</sup> | <b>1<sub>Hb</sub></b> | THF/H <sub>2</sub> O (15 : 0.2)                                     | 100 : 0                                       |
| 2 <sup>1</sup> | <b>1<sub>Hb</sub></b> | THF/D <sub>2</sub> O (15 : 0.2)                                     | 55 : 45                                       |
| 3 <sup>1</sup> | <b>1<sub>Hb</sub></b> | THF- <i>d</i> <sub>8</sub> /benzene/H <sub>2</sub> O (1 : 14 : 0.2) | 100 : 0                                       |
| 4              | <b>1<sub>Db</sub></b> | THF/H <sub>2</sub> O (15 : 0.2)                                     | 74 : 26                                       |
| 5              | <b>1<sub>Db</sub></b> | THF/D <sub>2</sub> O (15 : 0.2)                                     | 4 : 96                                        |

For polymer **1<sub>Hb</sub>**, sonication in THF and D<sub>2</sub>O (*Table S4, Entry 2*) revealed the extent of heterolytic cleavage to be 45% while sonication in THF-*d*<sub>8</sub>, benzene, and H<sub>2</sub>O (*Table S4, Entry 3*) showed no observable amount of cleavage to be homolytic in nature; this leaves the concerted pathway to make up the remaining ~55%. An additional experiment was carried out where **1<sub>Hb</sub>** was sonicated in THF and H<sub>2</sub>O (*Table S4, Entry 1*) to demonstrate sole formation of the protonated difluorobenzene.

For polymer **1<sub>Db</sub>**, sonication in THF and H<sub>2</sub>O (*Table S4, Entry 4*) revealed the extent of concerted cleavage to be just 26%, a substantial decrease from what is expected based on the protonated analogue. Sonication in THF and D<sub>2</sub>O (*Table S4, Entry 5*) showed 4% of **5<sub>Hb</sub>**. Again, we must take into account the incomplete deuteration of polymer **1<sub>Db</sub>** (98% D in **S5**). The extent of protonation for the experiment shown in *Table S4, Entry 4*, was actually 73.5% while for *Table S4, Entry 5* it was 3.0%. This analysis slightly changes the value for the homolytic pathway and leaves the heterolytic pathway to make up the remaining ~71% of cleavage events.

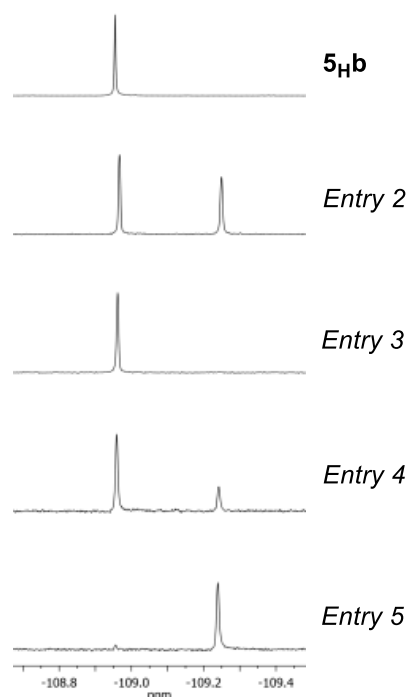

**Figure S2.** <sup>19</sup>F NMR (376 MHz, C<sub>6</sub>D<sub>6</sub>, 298 K) spectra showing the ratio of **5<sub>Hb</sub>** to **5<sub>Db</sub>** present in the post-sonication polymers reported in *Table S4*.

### 6.2.3 Sonication Experiments of Polymers **1<sub>Hc</sub>** and **1<sub>Dc</sub>**

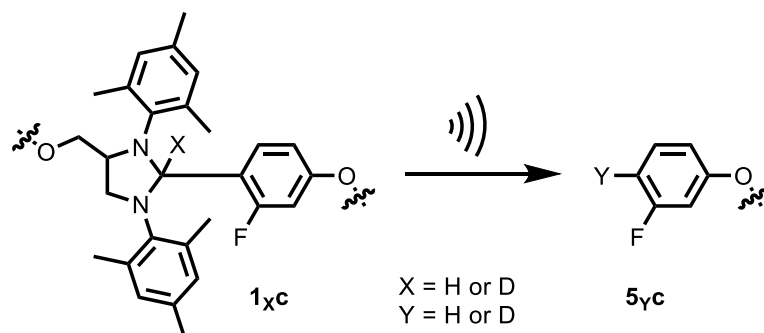

**Scheme S5.** The mechanical activation of polymer **1<sub>xc</sub>** via sonication leads to the formation of a fluorobenzene structure that can be either protonated or deuterated with the ratio of these species depending on the conditions used.

**Table S5.** Summary of sonication experiments carried out using **1<sub>Hc</sub>** and **1<sub>Dc</sub>** in various solvent systems along with the resulting ratio of protonated and deuterated fluorobenzene species (**5<sub>yc</sub>**, where the position of Y is shown above in *Scheme S5*) formed. Error:  $\pm 1\%$ .

| Entry          | Polymer               | Solvent Composition                                                 | <b>5<sub>Hc</sub></b> : <b>5<sub>Dc</sub></b> |
|----------------|-----------------------|---------------------------------------------------------------------|-----------------------------------------------|
| 1 <sup>1</sup> | <b>1<sub>Hc</sub></b> | THF/H <sub>2</sub> O (15 : 0.2)                                     | 100 : 0                                       |
| 2 <sup>1</sup> | <b>1<sub>Hc</sub></b> | THF/D <sub>2</sub> O (15 : 0.2)                                     | 75 : 25                                       |
| 3 <sup>1</sup> | <b>1<sub>Hc</sub></b> | THF- <i>d</i> <sub>8</sub> /benzene/H <sub>2</sub> O (1 : 14 : 0.2) | 100 : 0                                       |
| 4              | <b>1<sub>Dc</sub></b> | THF/H <sub>2</sub> O (15 : 0.2)                                     | 62 : 38                                       |
| 5              | <b>1<sub>Dc</sub></b> | THF/D <sub>2</sub> O (15 : 0.2)                                     | 4 : 96                                        |

For polymer **1<sub>Hc</sub>**, sonication in THF and D<sub>2</sub>O (*Table S5, Entry 2*) revealed the extent of heterolytic cleavage to be 25% while sonication in THF-*d*<sub>8</sub>, benzene, and H<sub>2</sub>O (*Table S5, Entry 3*) showed no observable amount of cleavage to be homolytic in nature; this leaves the concerted pathway to make up the remaining ~55%. An additional experiment was carried out where **1<sub>Hc</sub>** was sonicated in THF and H<sub>2</sub>O (*Table S5, Entry 1*) to demonstrate sole formation of the protonated fluorobenzene.

For polymer **1<sub>Dc</sub>**, sonication in THF and H<sub>2</sub>O (*Table S5, Entry 4*) revealed the extent of concerted cleavage to be just 38%, a substantial decrease from what is expected based on the protonated analogue. Sonication in THF and D<sub>2</sub>O (*Table S5, Entry 5*) showed 4% of **5<sub>Hc</sub>**. Again, we must take into account the incomplete deuteration of polymer **1<sub>Dc</sub>** (98% D in **S8**). The extent of protonation for the experiment shown in *Table S5, Entry 4*, was actually 61.2% while for *Table S5, Entry 5* it was 2.6%. This analysis slightly changes the values for the concerted and homolytic pathways and leaves the heterolytic pathway to make up the remaining ~59% of cleavage events.

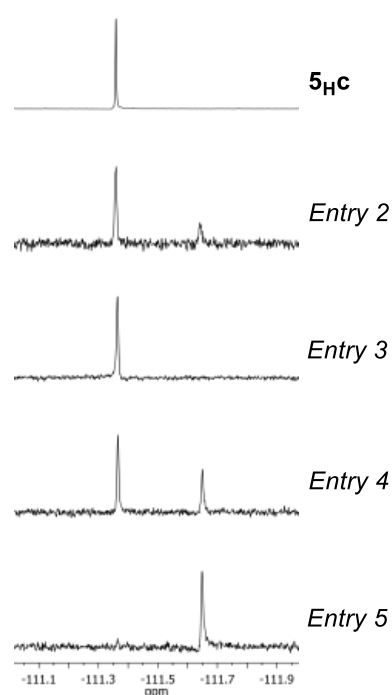

**Figure S3.** <sup>19</sup>F NMR (376 MHz, C<sub>6</sub>D<sub>6</sub>, 298 K) spectra showing the ratio of **5<sub>Hc</sub>** to **5<sub>Dc</sub>** present in the post-sonication polymers reported in *Table S5*.

### 6.3 Post-Sonication NMR Spectra

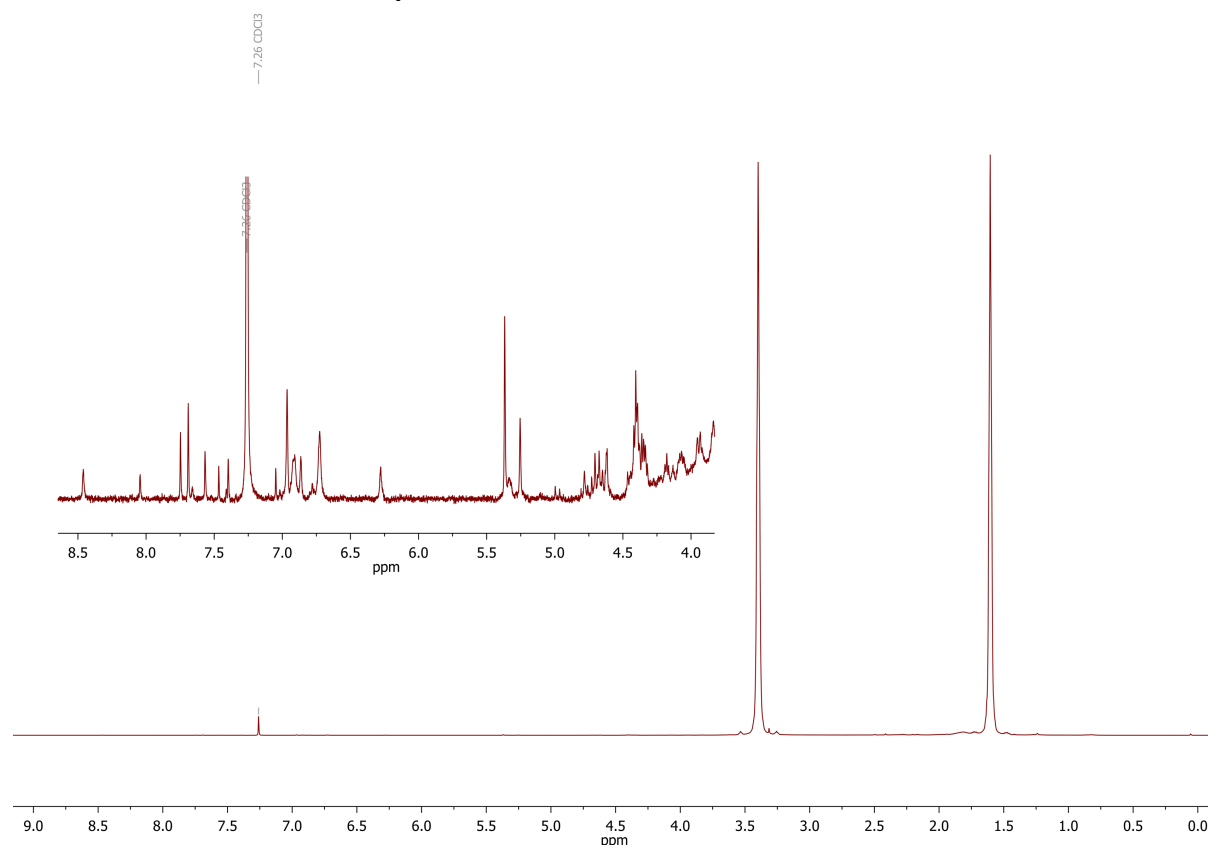

**Spectrum S32.**  $^1\text{H}$  NMR (500 MHz,  $\text{CDCl}_3$ , 298 K) of **1<sub>Ha</sub>** after 180 min of sonication in THF (15 mL) and  $\text{D}_2\text{O}$  (0.2 mL).

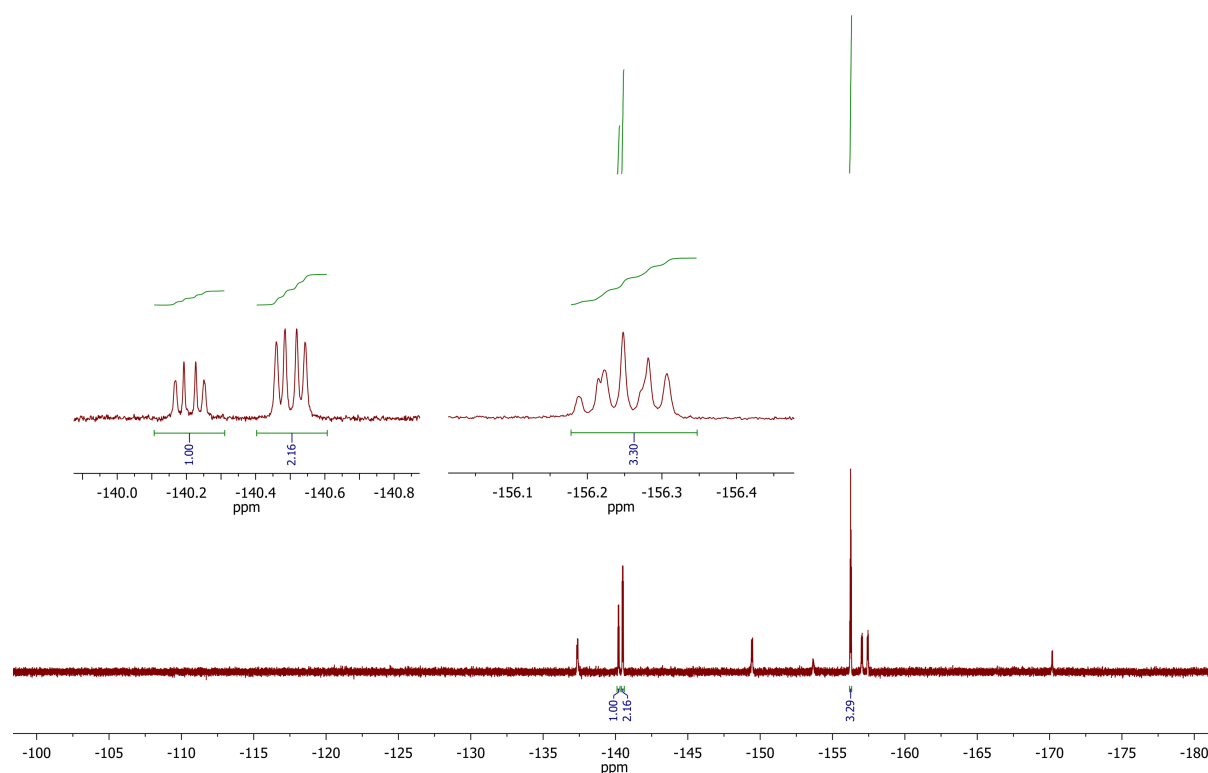

**Spectrum S33.**  $^{19}\text{F}$  NMR (376 MHz,  $\text{C}_6\text{D}_6$ , 298 K) of **1<sub>Ha</sub>** after 180 min of sonication in THF (15 mL) and  $\text{D}_2\text{O}$  (0.2 mL). Approximately 68% of the tetrafluorobenzene species formed is deuterated.

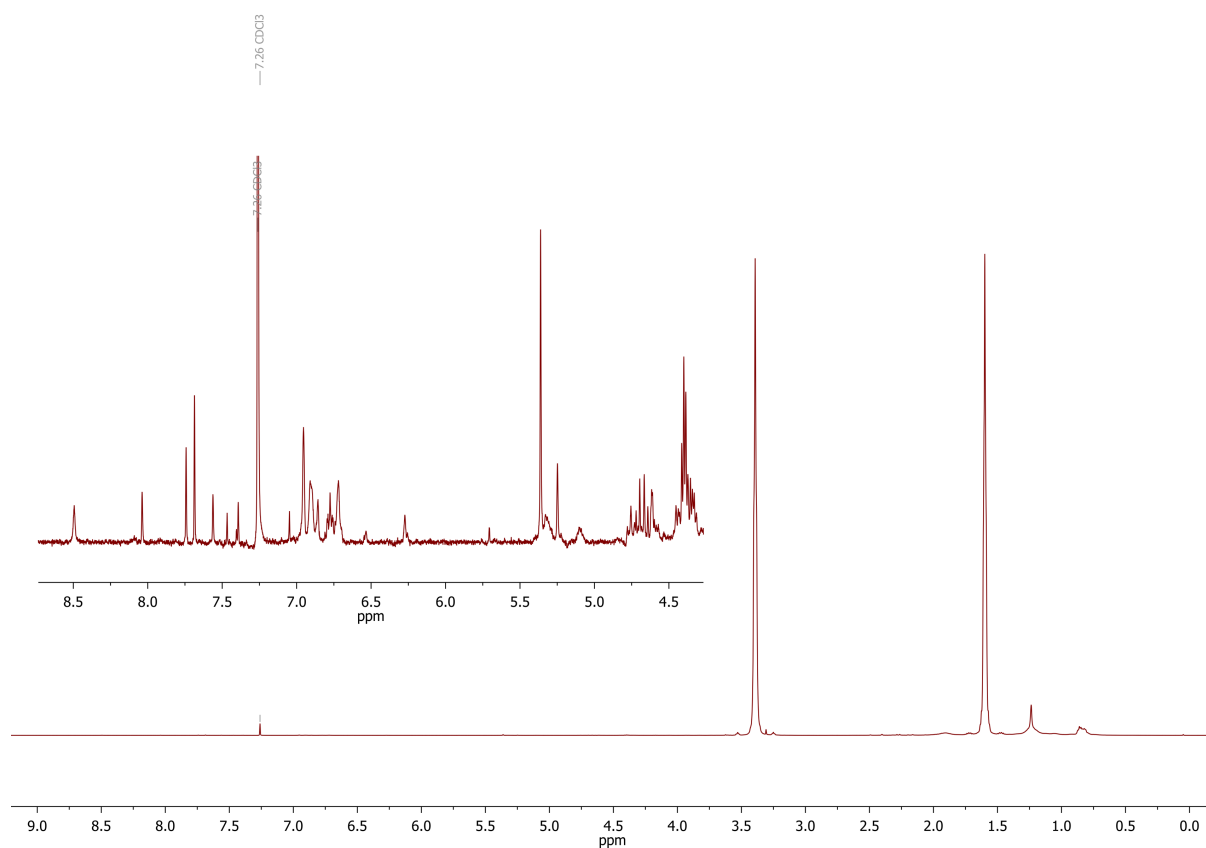

**Spectrum S34.**  $^1\text{H}$  NMR (500 MHz,  $\text{CDCl}_3$ , 298 K) of **1<sub>Ha</sub>** after 180 min of sonication in THF (15 mL) and  $\text{H}_2\text{O}$  (0.2 mL).

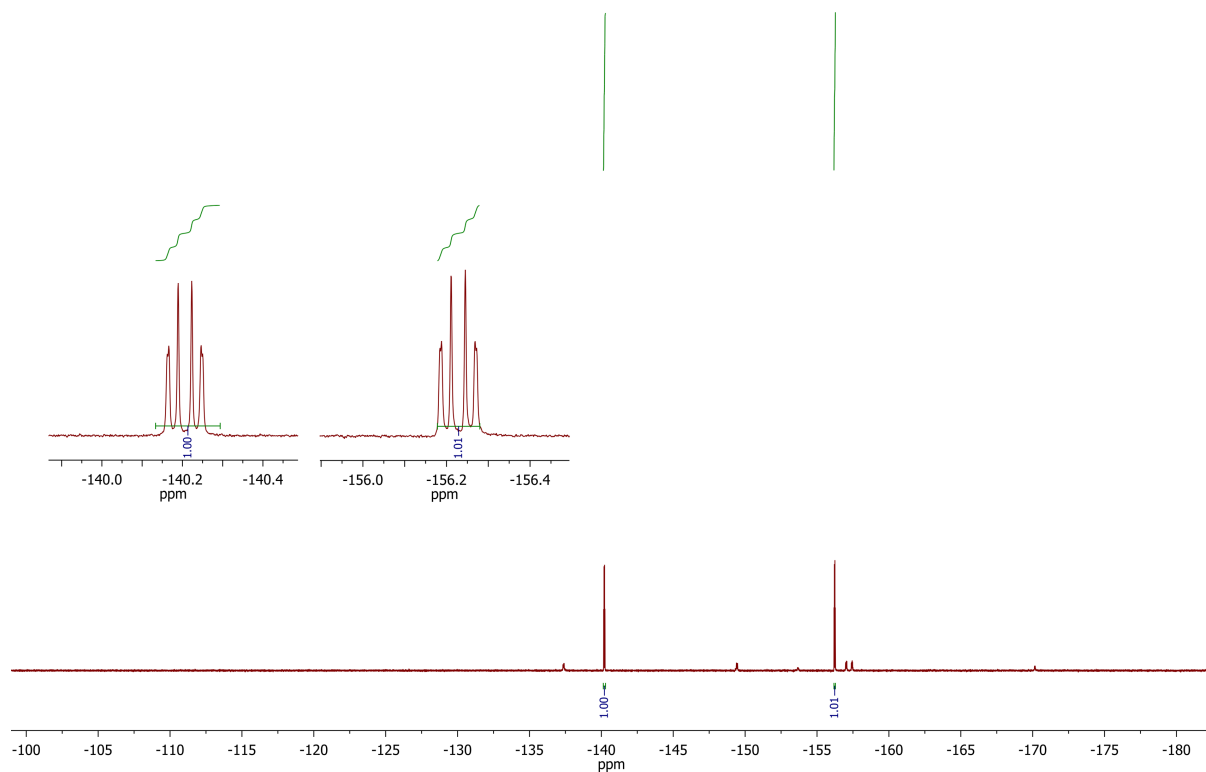

**Spectrum S35.**  $^{19}\text{F}$  NMR (376 MHz,  $\text{C}_6\text{D}_6$ , 298 K) of **1<sub>Ha</sub>** after 180 min of sonication in THF (15 mL) and  $\text{H}_2\text{O}$  (0.2 mL). 0% of the tetrafluorobenzene species formed is deuterated.

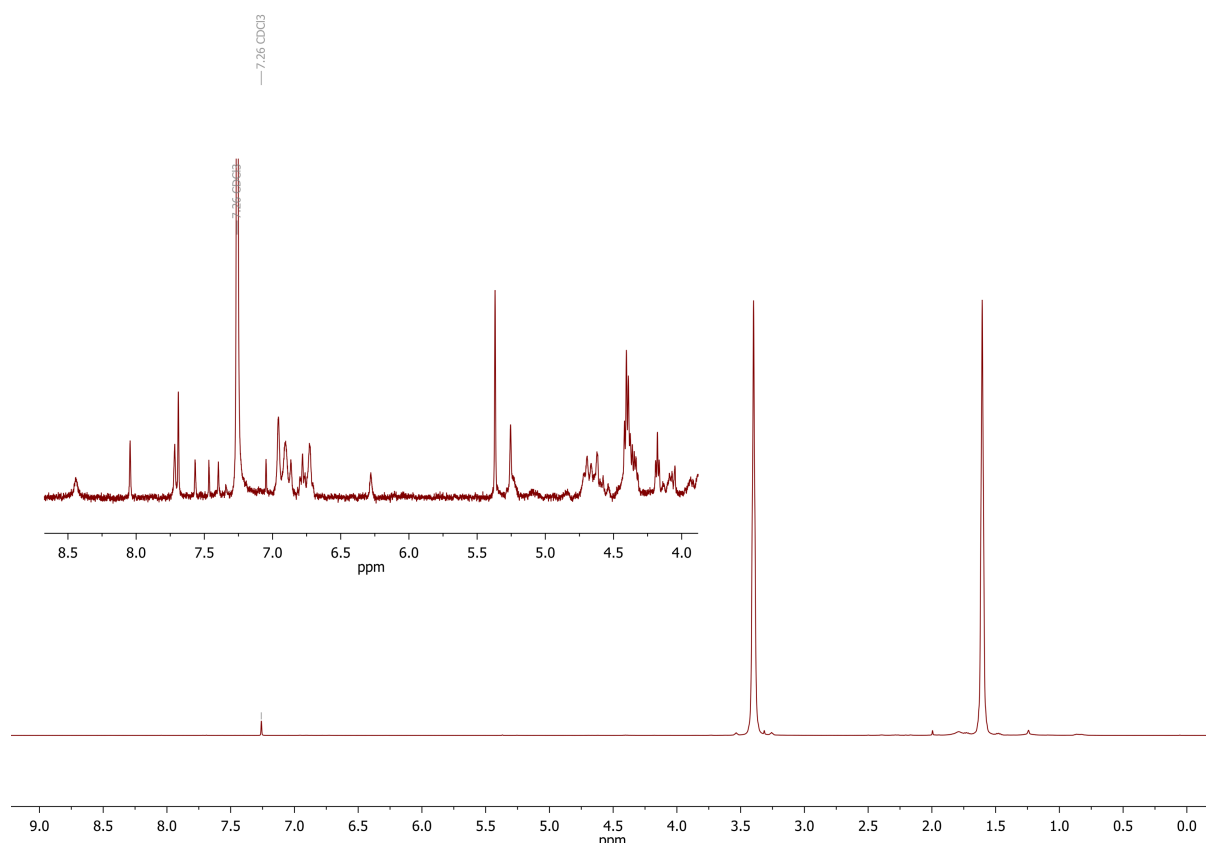

**Spectrum S36.**  $^1\text{H}$  NMR (500 MHz,  $\text{CDCl}_3$ , 298 K) of **1Ha** after 180 min of sonication in THF- $\text{d}_8$  (1 mL), benzene (14 mL) and  $\text{H}_2\text{O}$  (0.2 mL).

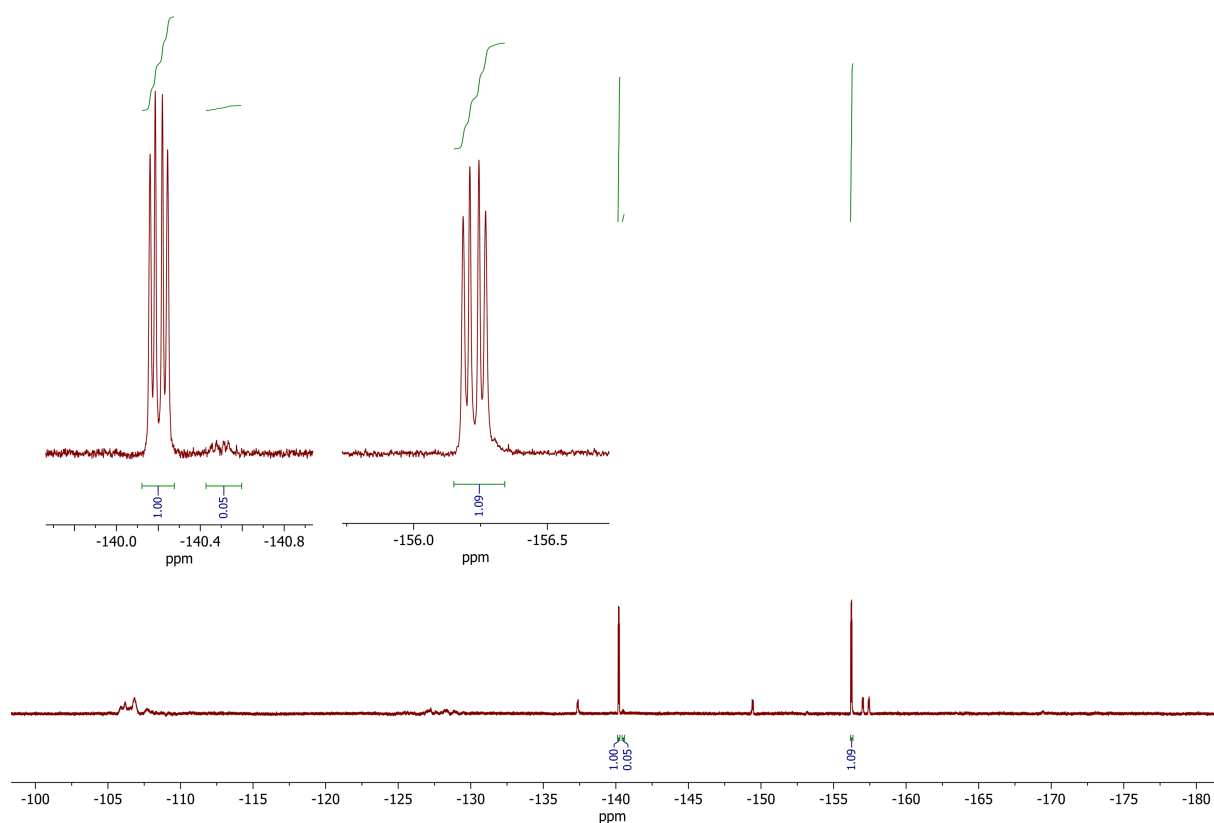

**Spectrum S37.**  $^{19}\text{F}$  NMR (376 MHz,  $\text{C}_6\text{D}_6$ , 298 K) of **1Ha** after 180 min of sonication in THF- $\text{d}_8$  (1 mL), benzene (14 mL) and  $\text{H}_2\text{O}$  (0.2 mL). Approximately 5% of the tetrafluorobenzene species formed is deuterated.

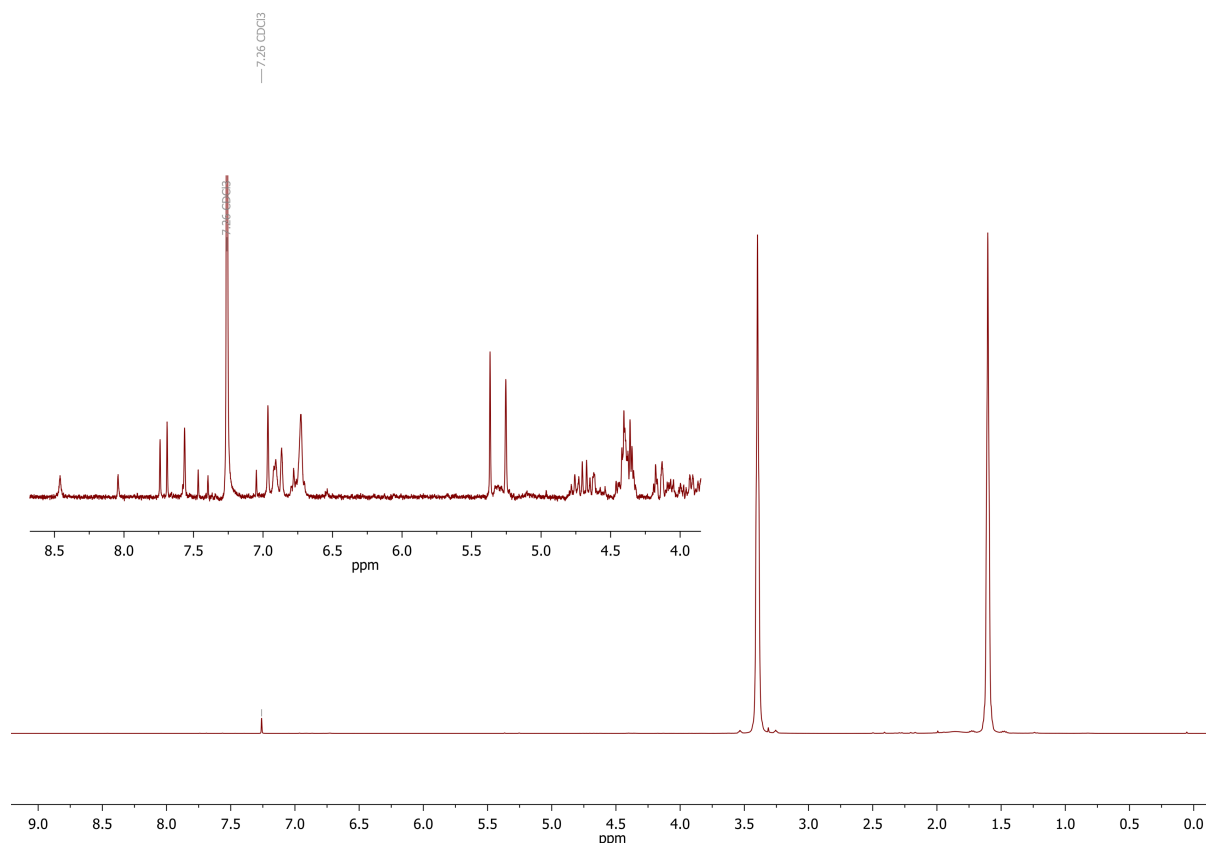

**Spectrum S38.** <sup>1</sup>H NMR (500 MHz, CDCl<sub>3</sub>, 298 K) of **1Da** after 180 min of sonication in THF (15 mL) and H<sub>2</sub>O (0.2 mL).

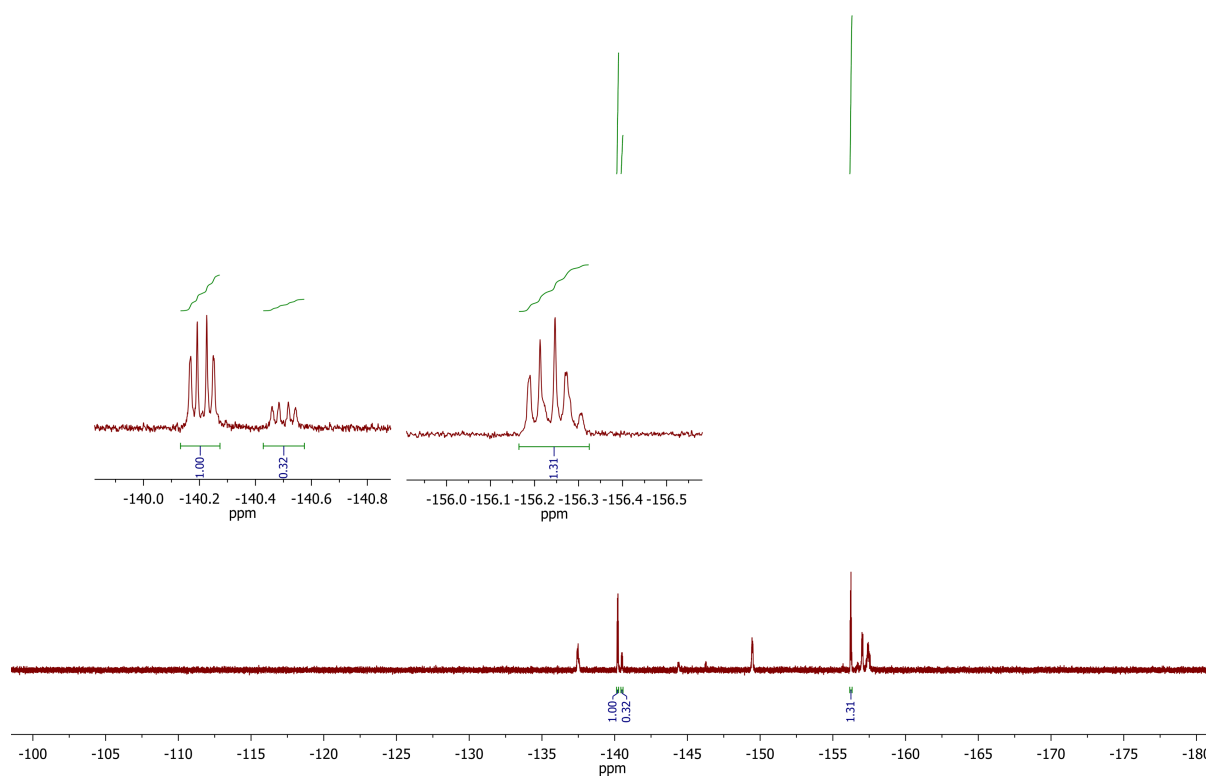

**Spectrum S39.** <sup>19</sup>F NMR (376 MHz, C<sub>6</sub>D<sub>6</sub>, 298 K) of **1Da** after 180 min of sonication in THF (15 mL) and H<sub>2</sub>O (0.2 mL). Approximately 24% of the tetrafluorobenzene species formed is deuterated.

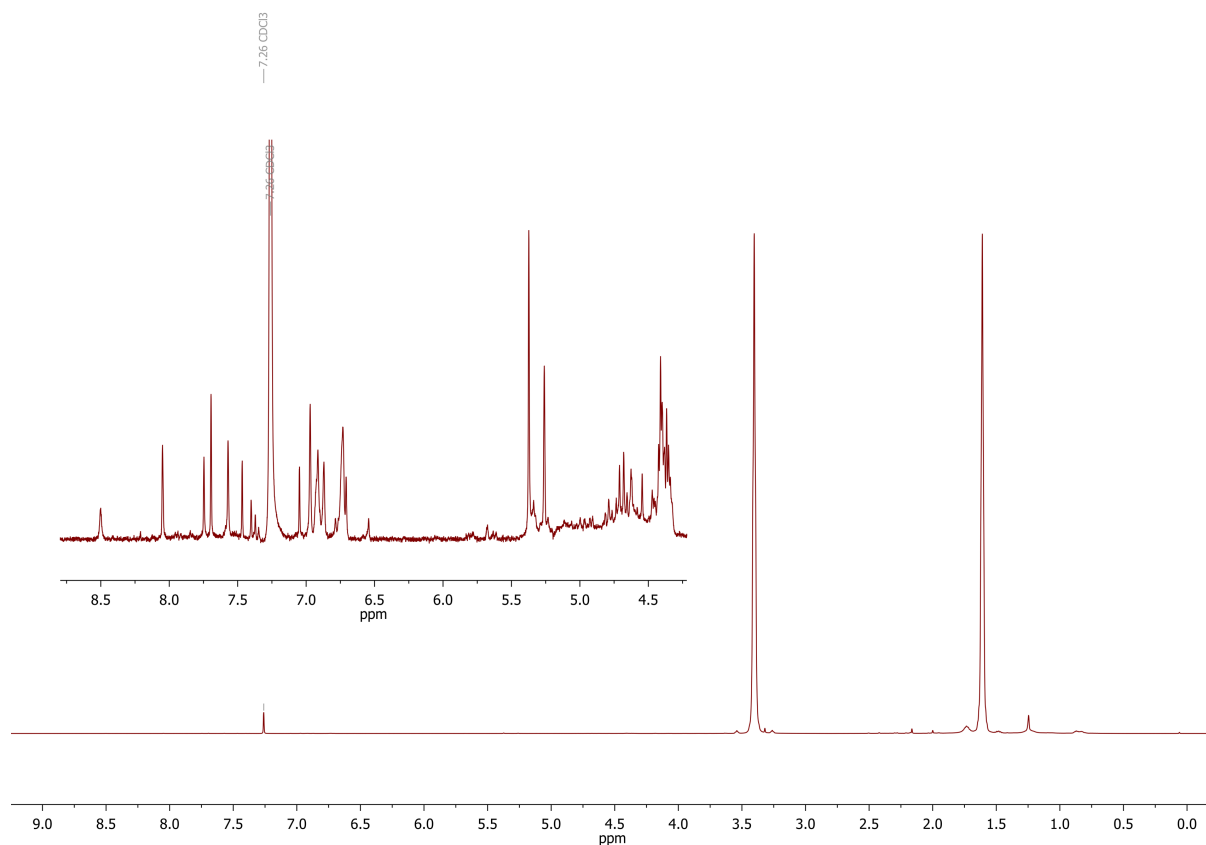

**Spectrum S40.**  $^1\text{H}$  NMR (500 MHz,  $\text{CDCl}_3$ , 298 K) of **1ba** after 180 min of sonication in THF (15 mL) and  $\text{D}_2\text{O}$  (0.2 mL).

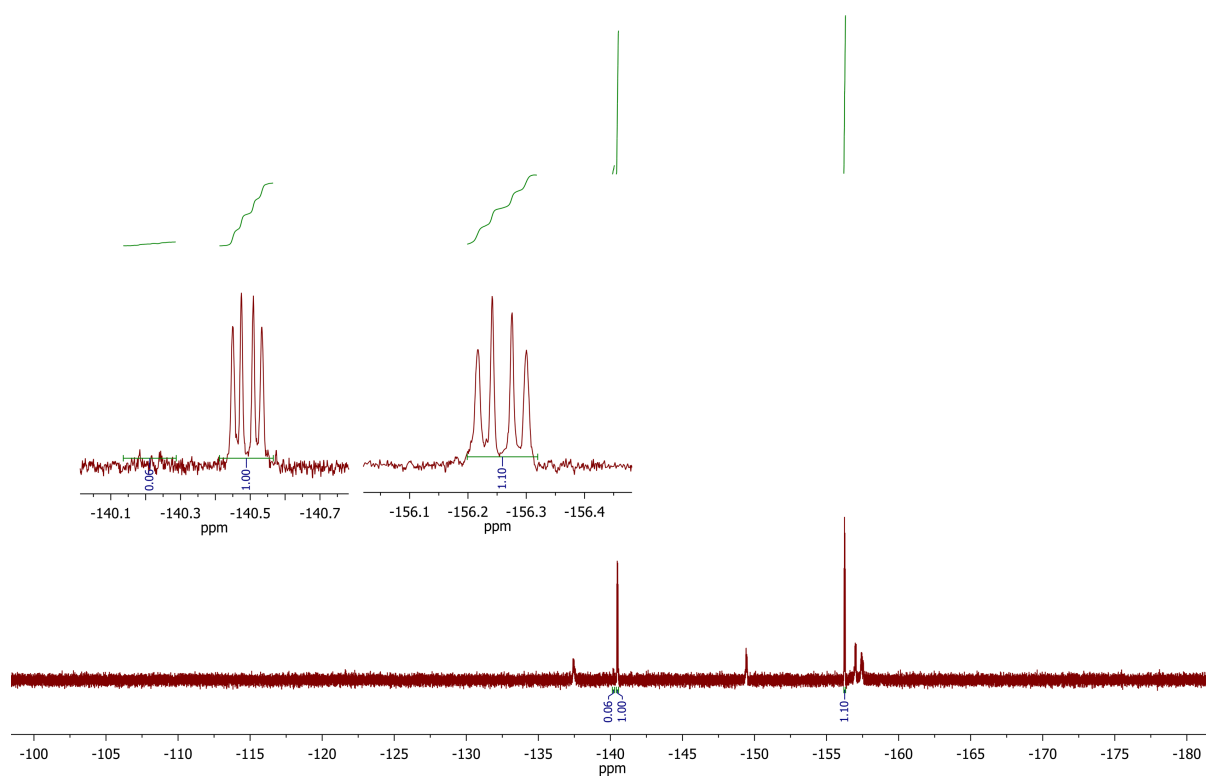

**Spectrum S41.**  $^{19}\text{F}$  NMR (376 MHz,  $\text{C}_6\text{D}_6$ , 298 K) of **1ba** after 180 min of sonication in THF (15 mL) and  $\text{D}_2\text{O}$  (0.2 mL). Approximately 94% of the tetrafluorobenzene species formed is deuterated.



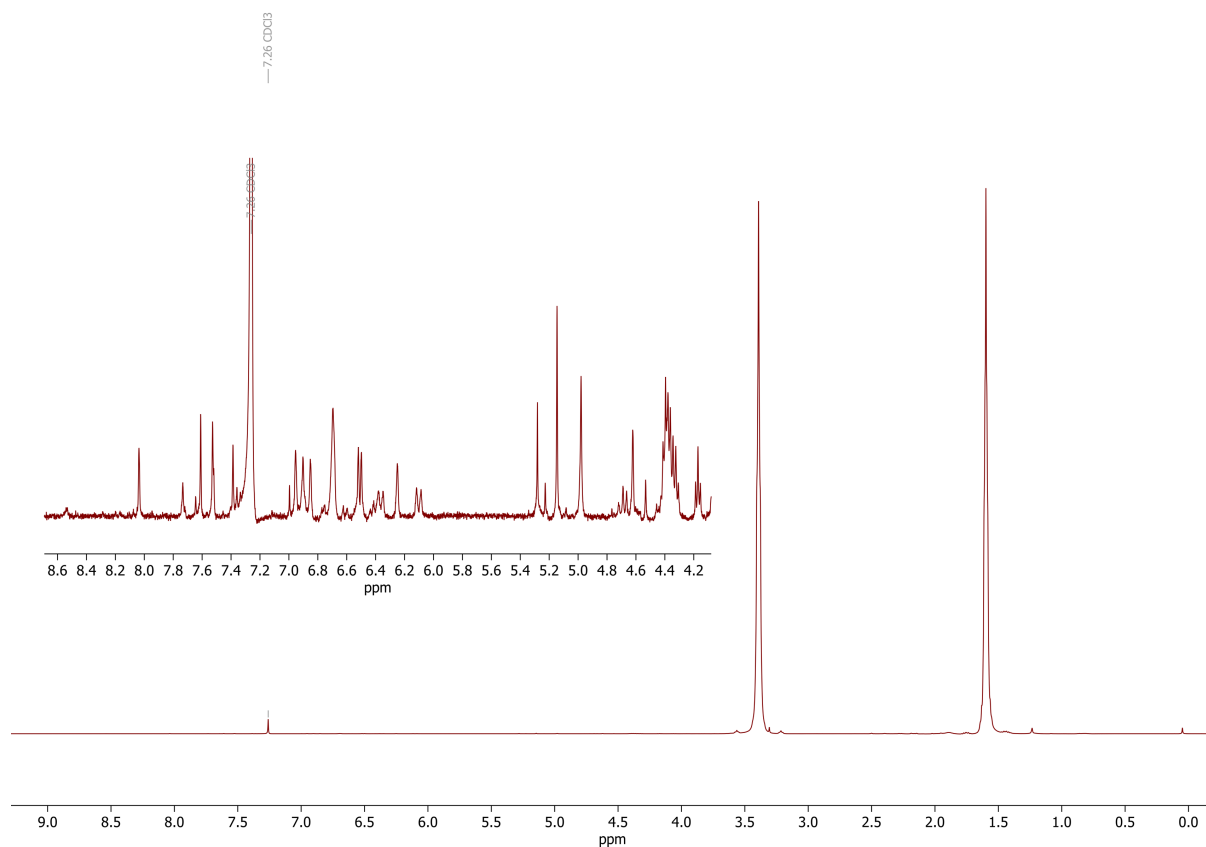

**Spectrum S42.** <sup>1</sup>H NMR (500 MHz, CDCl<sub>3</sub>, 298 K) of **1<sub>H</sub>b** after 180 min of sonication in THF (15 mL) and D<sub>2</sub>O (0.2 mL).

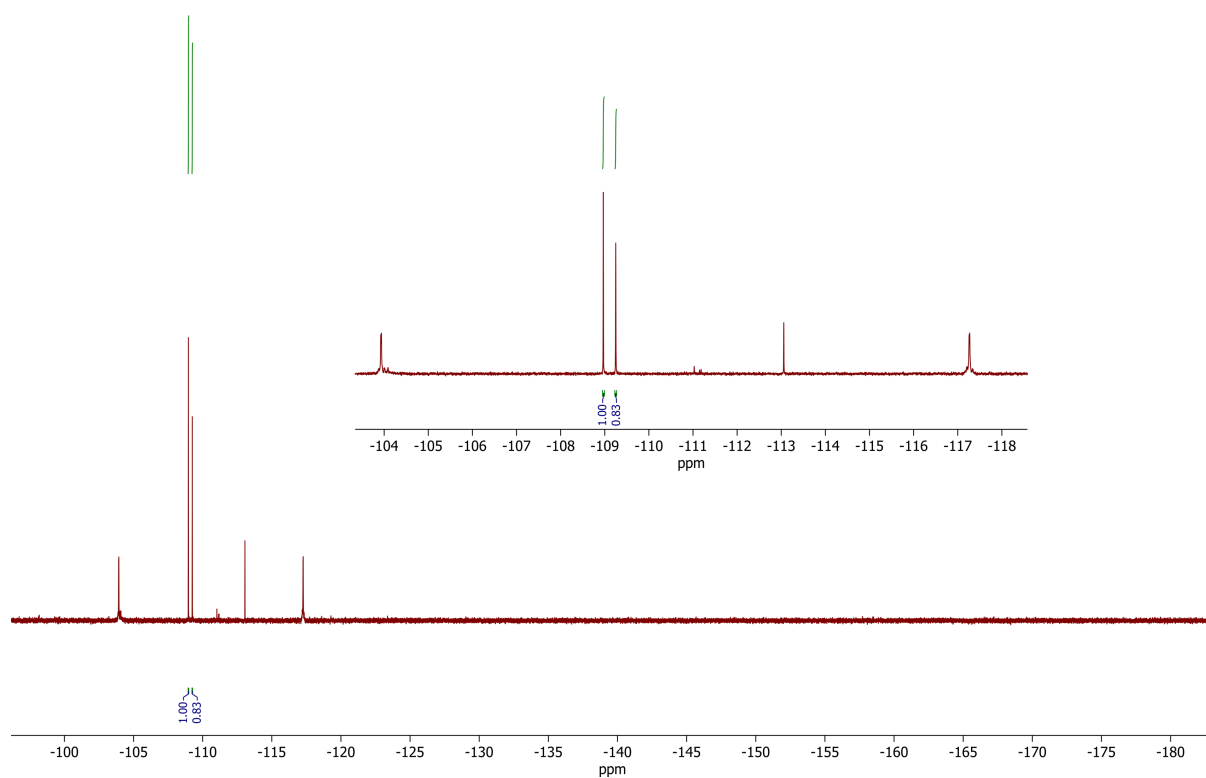

**Spectrum S43.** <sup>19</sup>F NMR (376 MHz, C<sub>6</sub>D<sub>6</sub>, 298 K) of **1<sub>H</sub>b** after 180 min of sonication in THF (15 mL) and D<sub>2</sub>O (0.2 mL). Approximately 45% of the difluorobenzene species formed is deuterated.

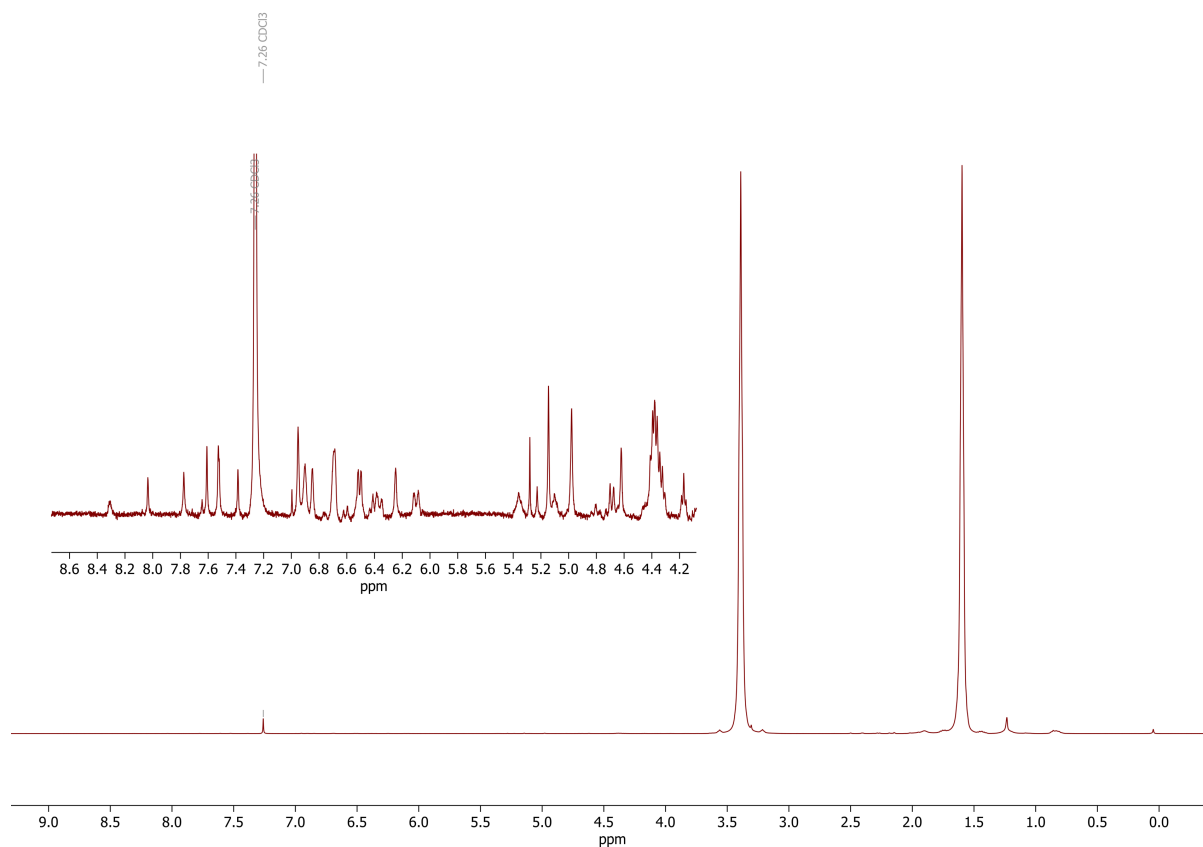

**Spectrum S44.** <sup>1</sup>H NMR (500 MHz, CDCl<sub>3</sub>, 298 K) of **1<sub>h</sub>b** after 180 min of sonication in THF (15 mL) and H<sub>2</sub>O (0.2 mL).

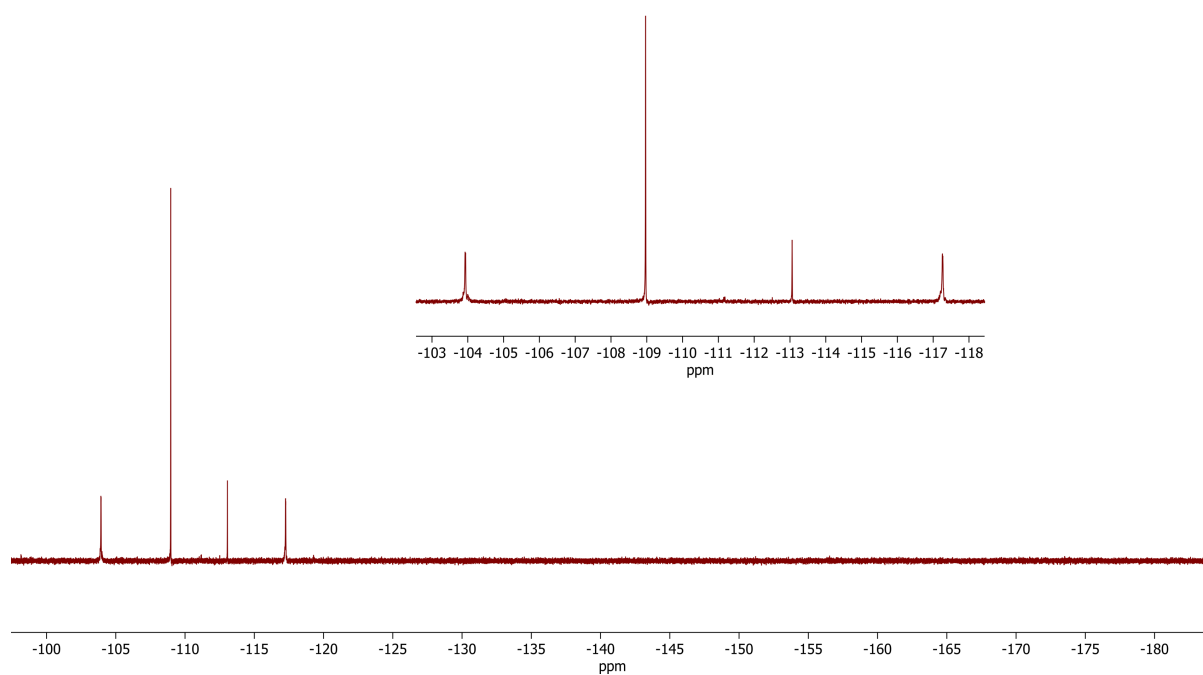

**Spectrum S45.** <sup>19</sup>F NMR (376 MHz, C<sub>6</sub>D<sub>6</sub>, 298 K) of **1<sub>h</sub>b** after 180 min of sonication in THF (15 mL) and H<sub>2</sub>O (0.2 mL). 0% of the difluorobenzene species formed is deuterated.

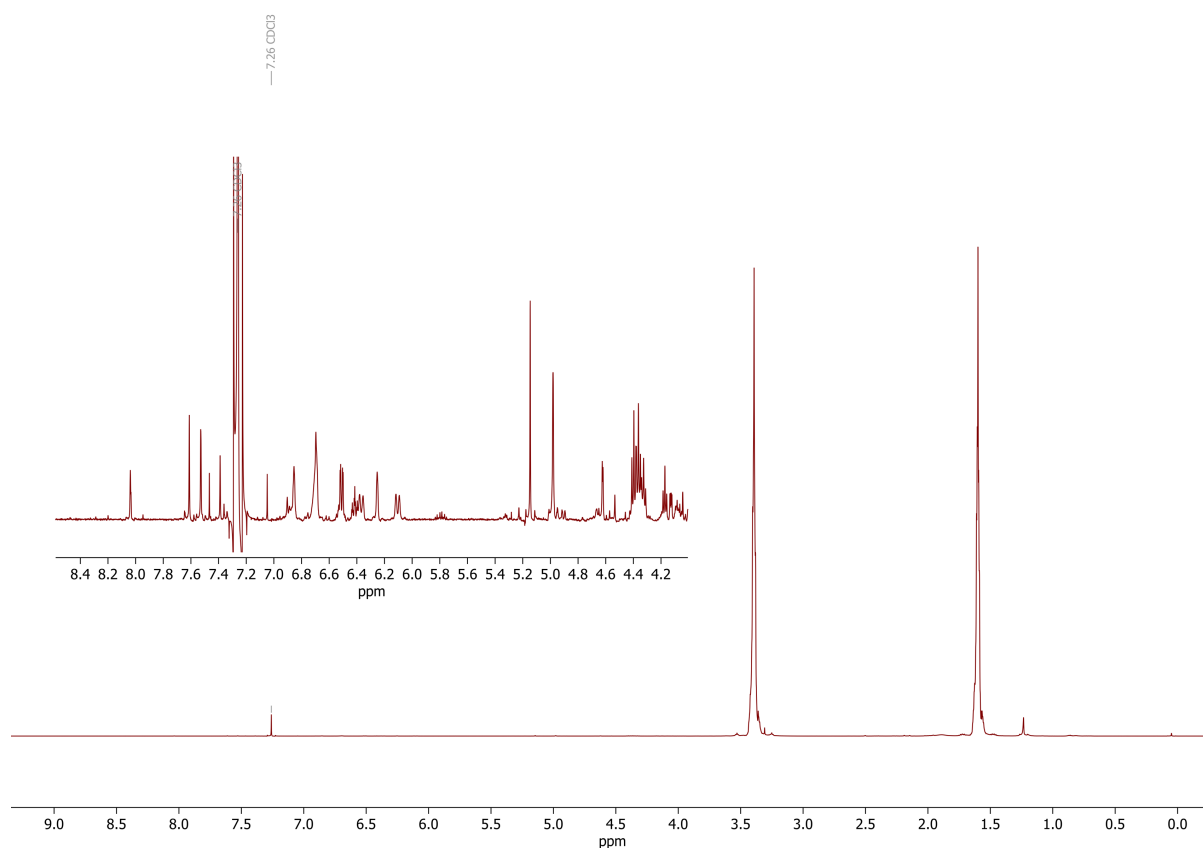

**Spectrum S46.**  $^1\text{H}$  NMR (500 MHz,  $\text{CDCl}_3$ , 298 K) of **1<sub>Hb</sub>** after 180 min of sonication in THF- $\text{d}_8$  (1 mL), benzene (14 mL) and  $\text{H}_2\text{O}$  (0.2 mL).

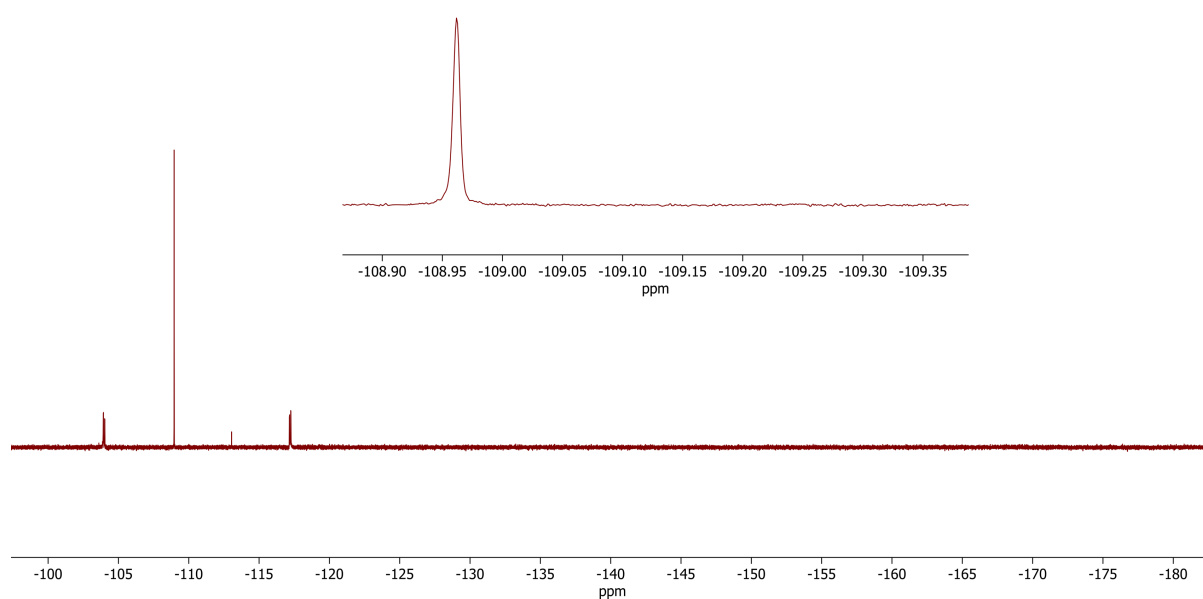

**Spectrum S47.**  $^{19}\text{F}$  NMR (376 MHz,  $\text{C}_6\text{D}_6$ , 298 K) of **1<sub>Hb</sub>** after 180 min of sonication in THF- $\text{d}_8$  (1 mL), benzene (14 mL) and  $\text{H}_2\text{O}$  (0.2 mL). There is no observable deuteration of the difluorobenzene species formed.

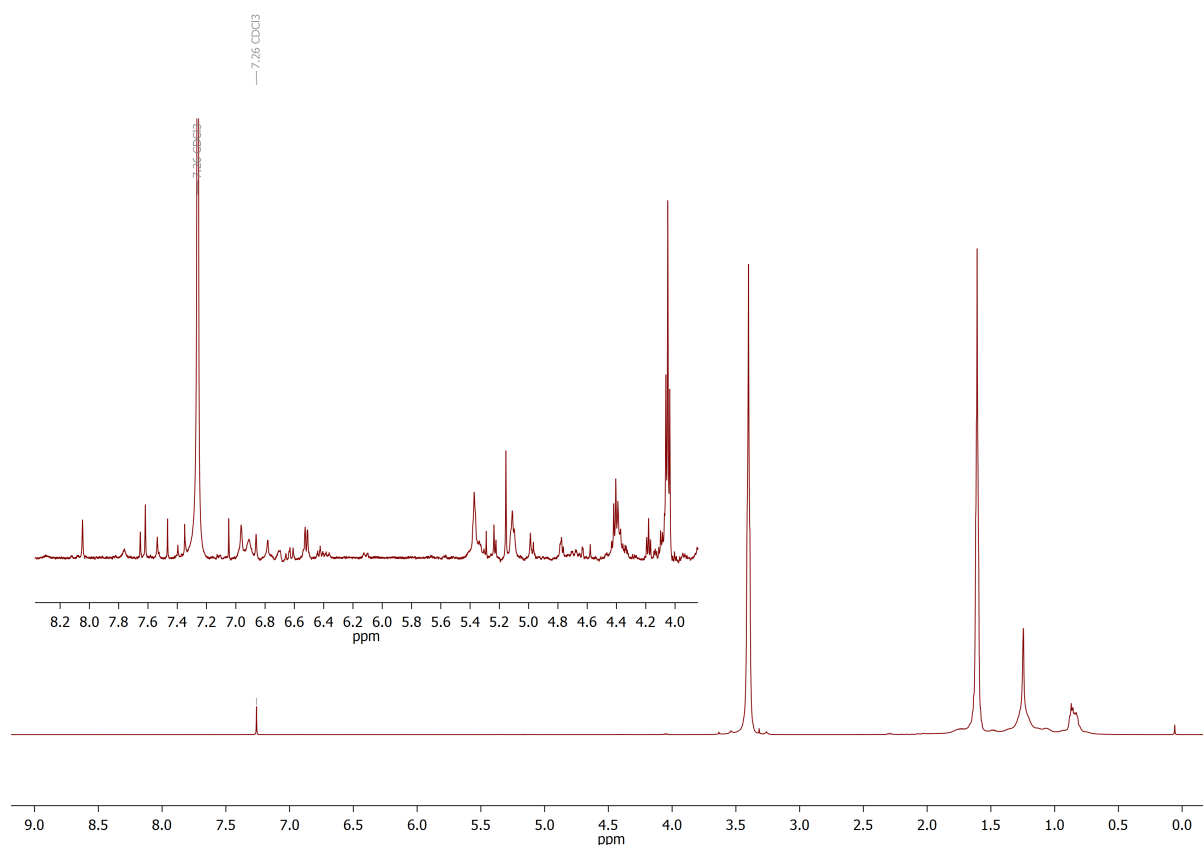

**Spectrum S48.** <sup>1</sup>H NMR (500 MHz, CDCl<sub>3</sub>, 298 K) of **1b** after 180 min of sonication in THF (15 mL) and H<sub>2</sub>O (0.2 mL).

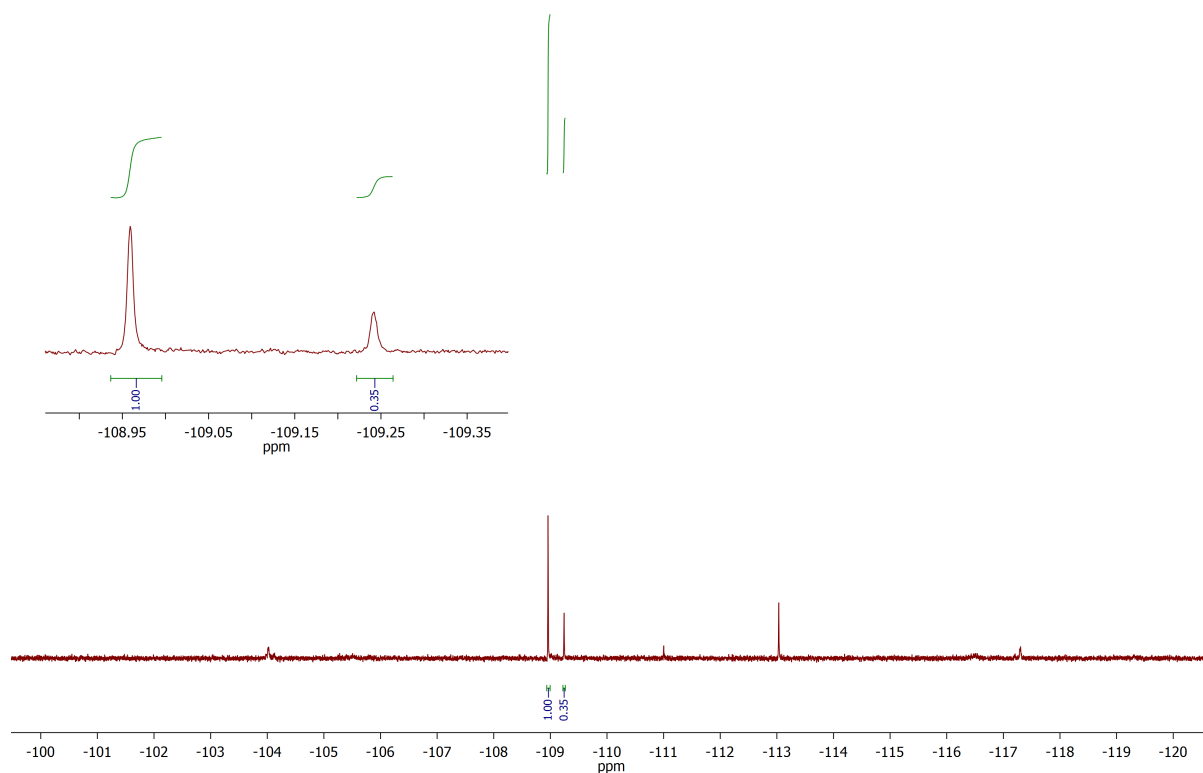

**Spectrum S49.** <sup>19</sup>F NMR (376 MHz, C<sub>6</sub>D<sub>6</sub>, 298 K) of **1b** after 180 min of sonication in THF (15 mL) and H<sub>2</sub>O (0.2 mL). Approximately 26% of the difluorobenzene species formed is deuterated.

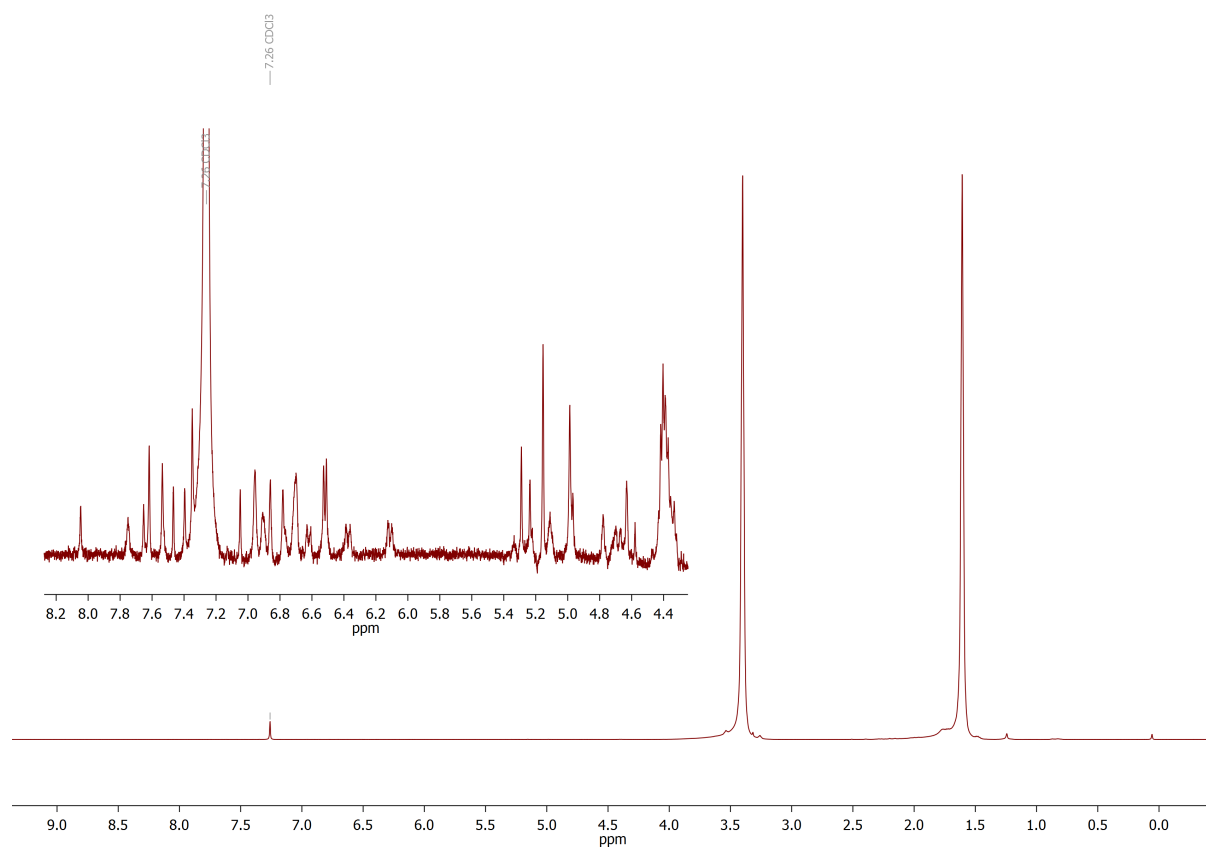

**Spectrum S50.** <sup>1</sup>H NMR (500 MHz, CDCl<sub>3</sub>, 298 K) of **1<sub>b</sub>** after 180 min of sonication in THF (15 mL) and D<sub>2</sub>O (0.2 mL).

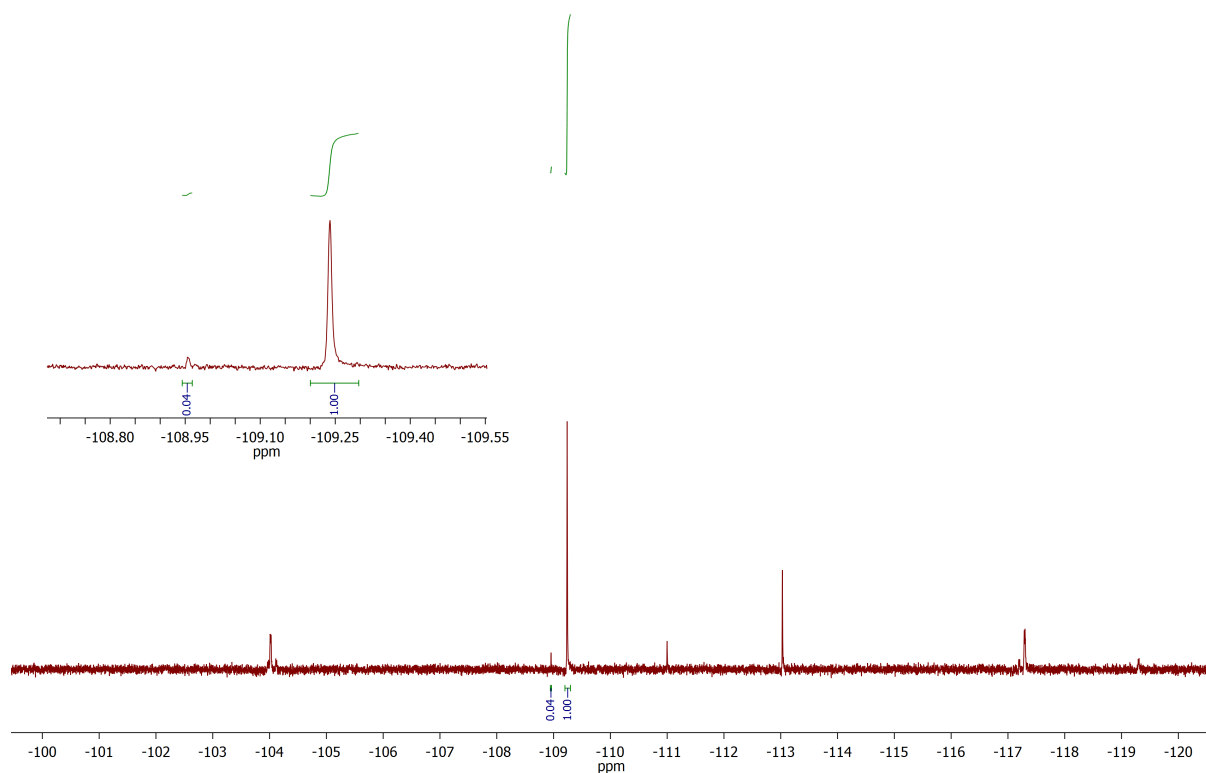

**Spectrum S51.** <sup>19</sup>F NMR (376 MHz, C<sub>6</sub>D<sub>6</sub>, 298 K) of **1<sub>b</sub>** after 180 min of sonication in THF (15 mL) and D<sub>2</sub>O (0.2 mL). Approximately 96% of the difluorobenzene species formed is deuterated.

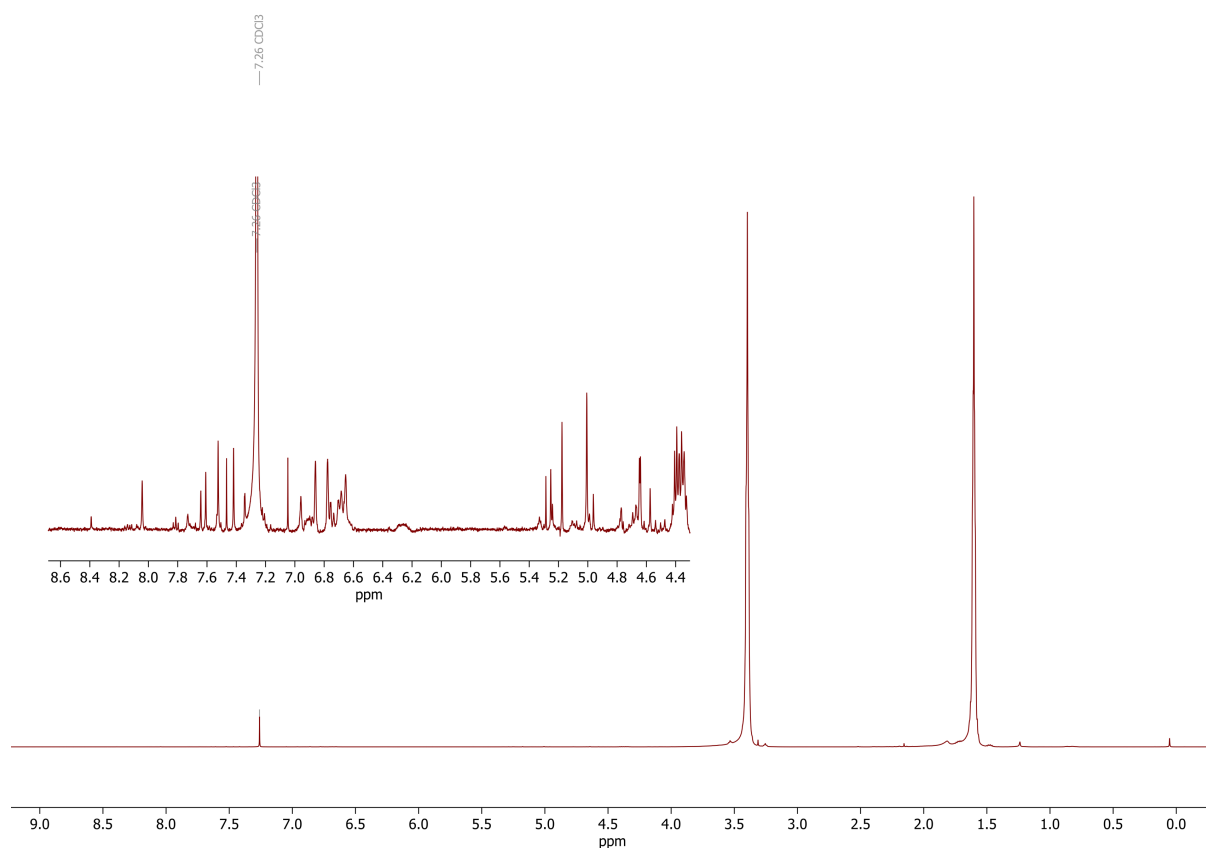

**Spectrum S52.**  $^1\text{H}$  NMR (500 MHz,  $\text{CDCl}_3$ , 298 K) of **1<sub>Hc</sub>** after 180 min of sonication in THF (15 mL) and  $\text{D}_2\text{O}$  (0.2 mL).

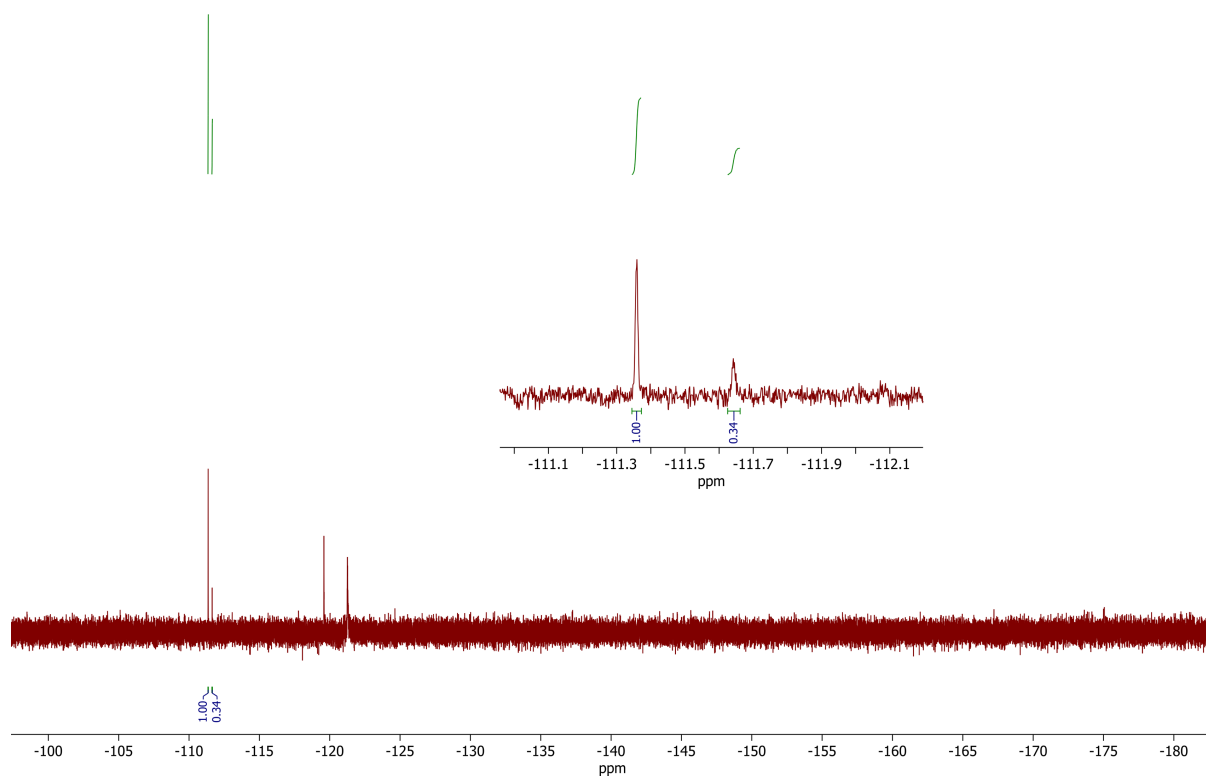

**Spectrum S53.**  $^{19}\text{F}$  NMR (376 MHz,  $\text{C}_6\text{D}_6$ , 298 K) of **1<sub>Hc</sub>** after 180 min of sonication in THF (15 mL) and  $\text{D}_2\text{O}$  (0.2 mL). Approximately 25% of the fluorobenzene species formed is deuterated.

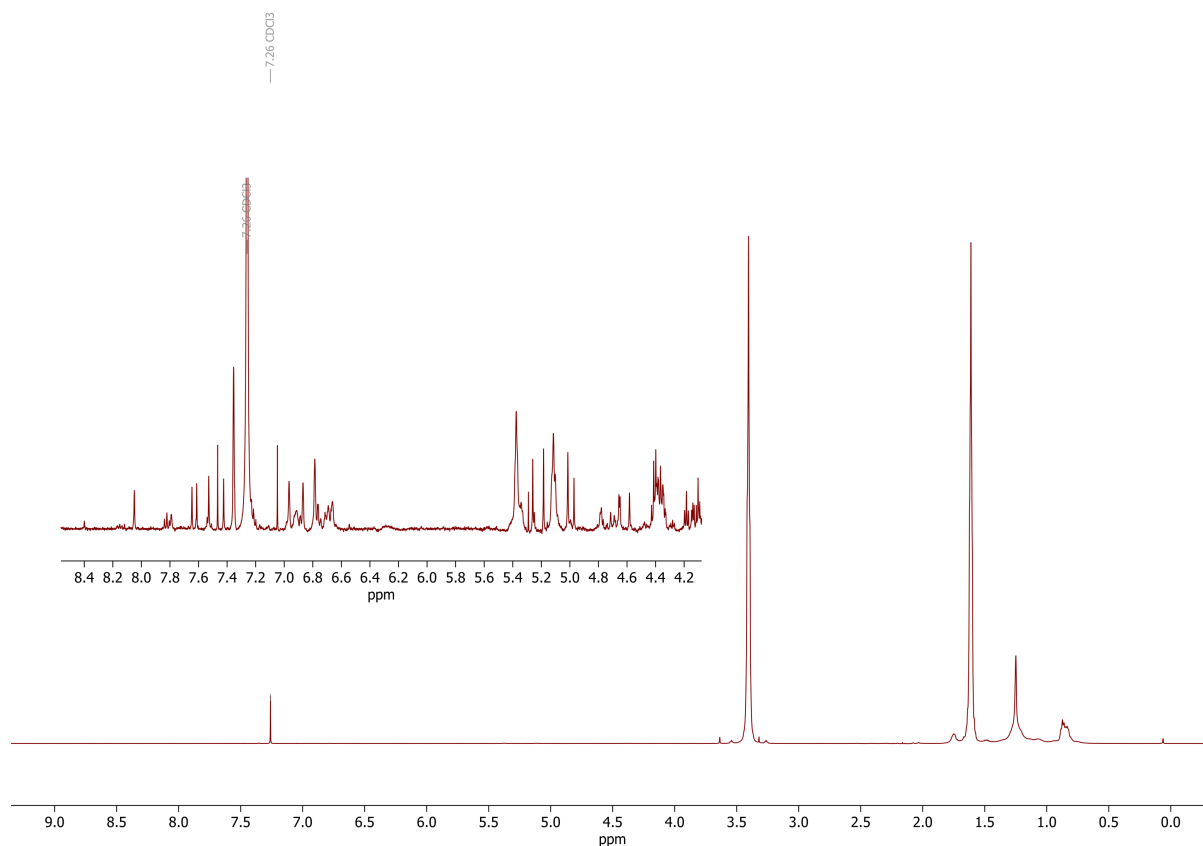

**Spectrum S54.**  $^1\text{H}$  NMR (500 MHz,  $\text{CDCl}_3$ , 298 K) of **1<sub>Hc</sub>** after 180 min of sonication in THF (15 mL) and  $\text{H}_2\text{O}$  (0.2 mL).

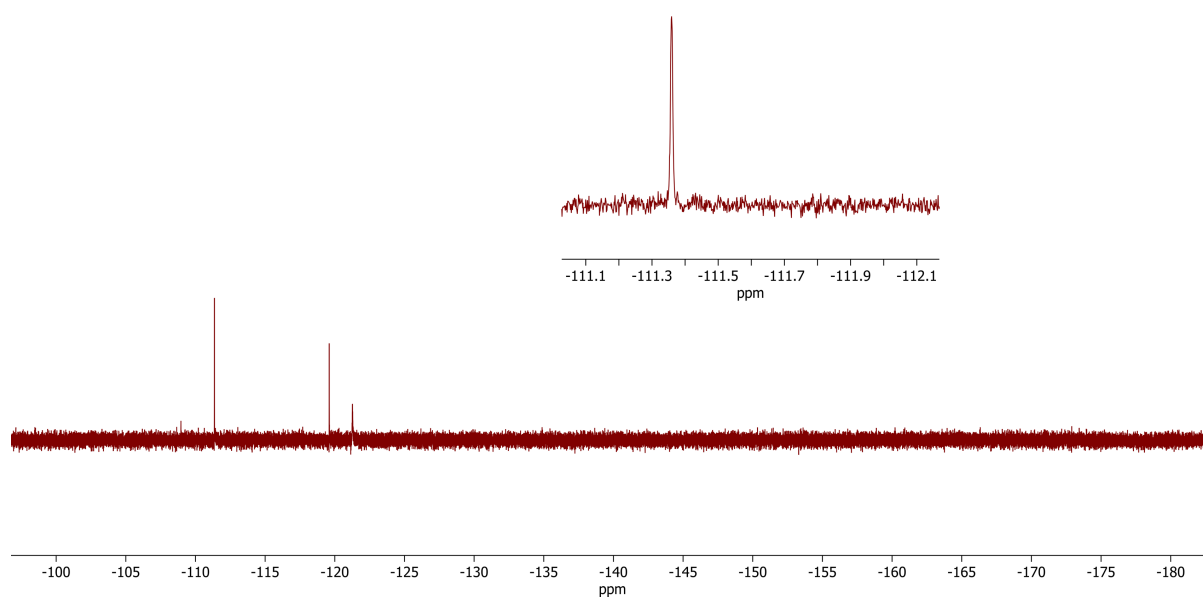

**Spectrum S55.**  $^{19}\text{F}$  NMR (376 MHz,  $\text{C}_6\text{D}_6$ , 298 K) of **1<sub>Hc</sub>** after 180 min of sonication in THF (15 mL) and  $\text{H}_2\text{O}$  (0.2 mL). 0% of the fluorobenzene species formed is deuterated.

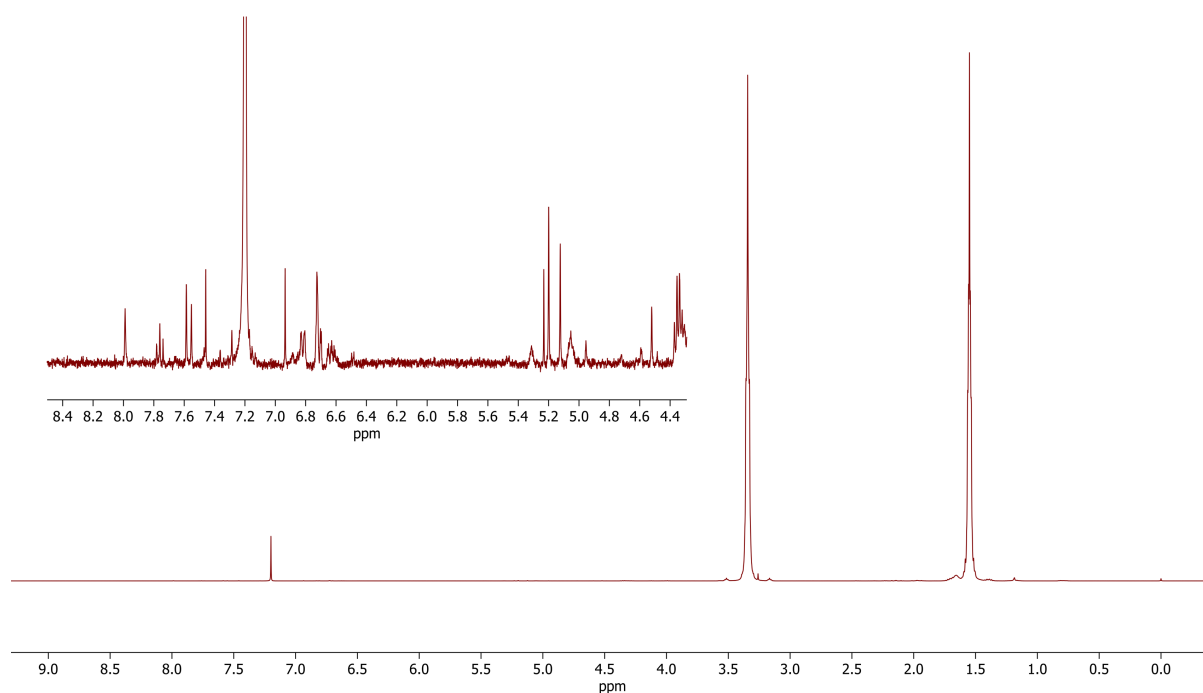

**Spectrum S56.**  $^1\text{H}$  NMR (500 MHz,  $\text{CDCl}_3$ , 298 K) of **1<sub>Hc</sub>** after 180 min of sonication in THF- $\text{d}_8$  (1 mL), benzene (14 mL) and  $\text{H}_2\text{O}$  (0.2 mL).

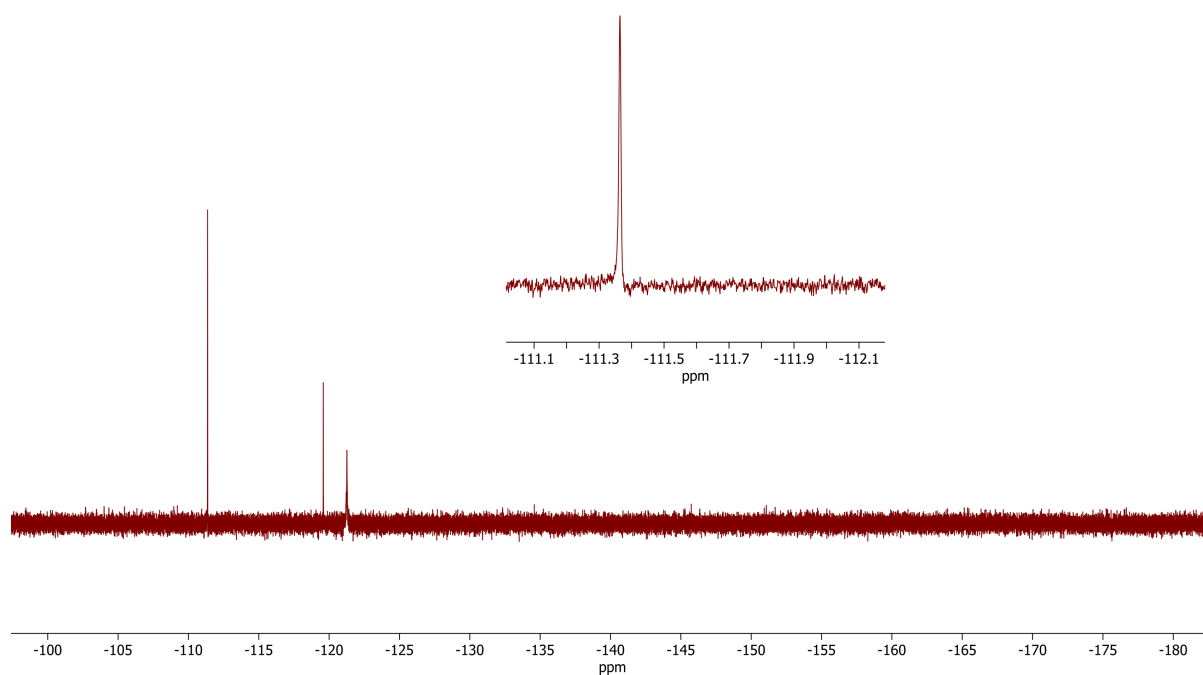

**Spectrum S57.**  $^{19}\text{F}$  NMR (376 MHz,  $\text{C}_6\text{D}_6$ , 298 K) of **1<sub>Hc</sub>** after 180 min of sonication in THF- $\text{d}_8$  (1 mL), benzene (14 mL) and  $\text{H}_2\text{O}$  (0.2 mL). There is no observable deuteration of the fluorobenzene species formed.



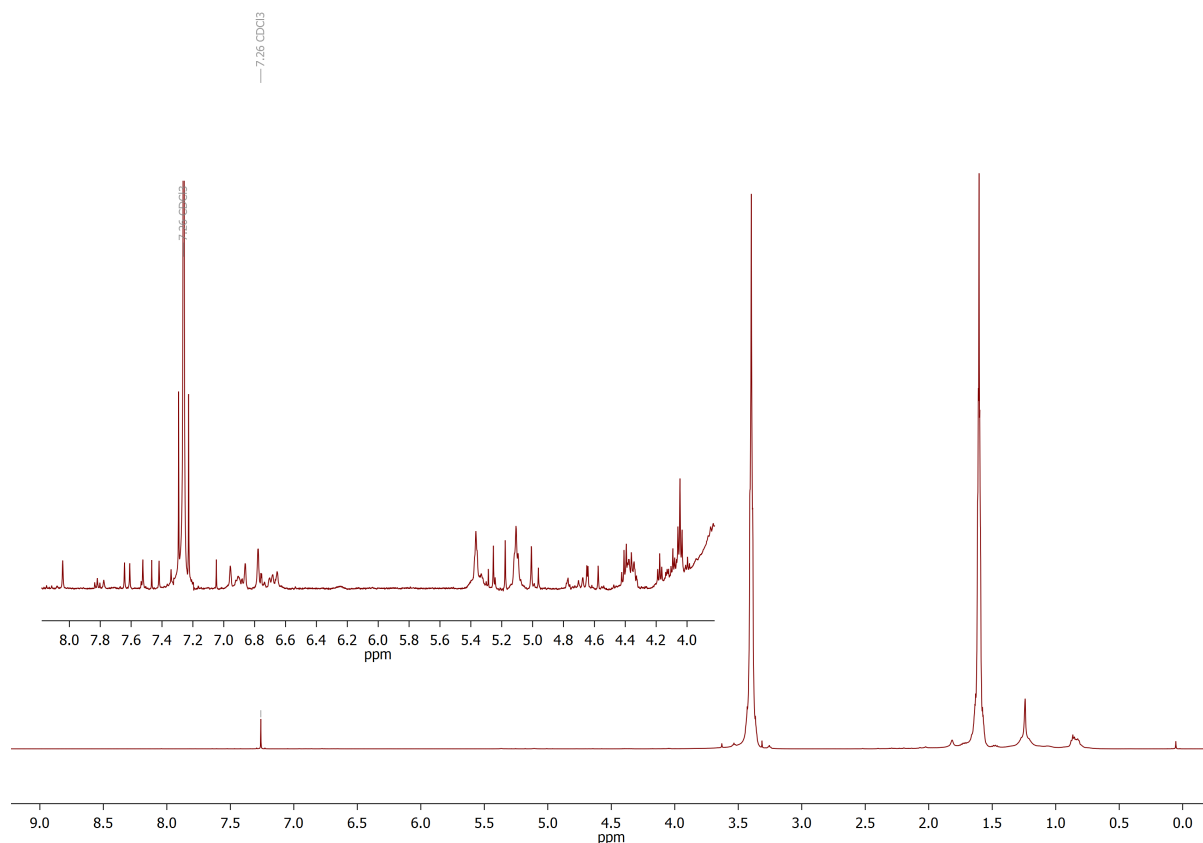

**Spectrum S58.** <sup>1</sup>H NMR (500 MHz, CDCl<sub>3</sub>, 298 K) of **1b** after 180 min of sonication in THF (15 mL) and H<sub>2</sub>O (0.2 mL).

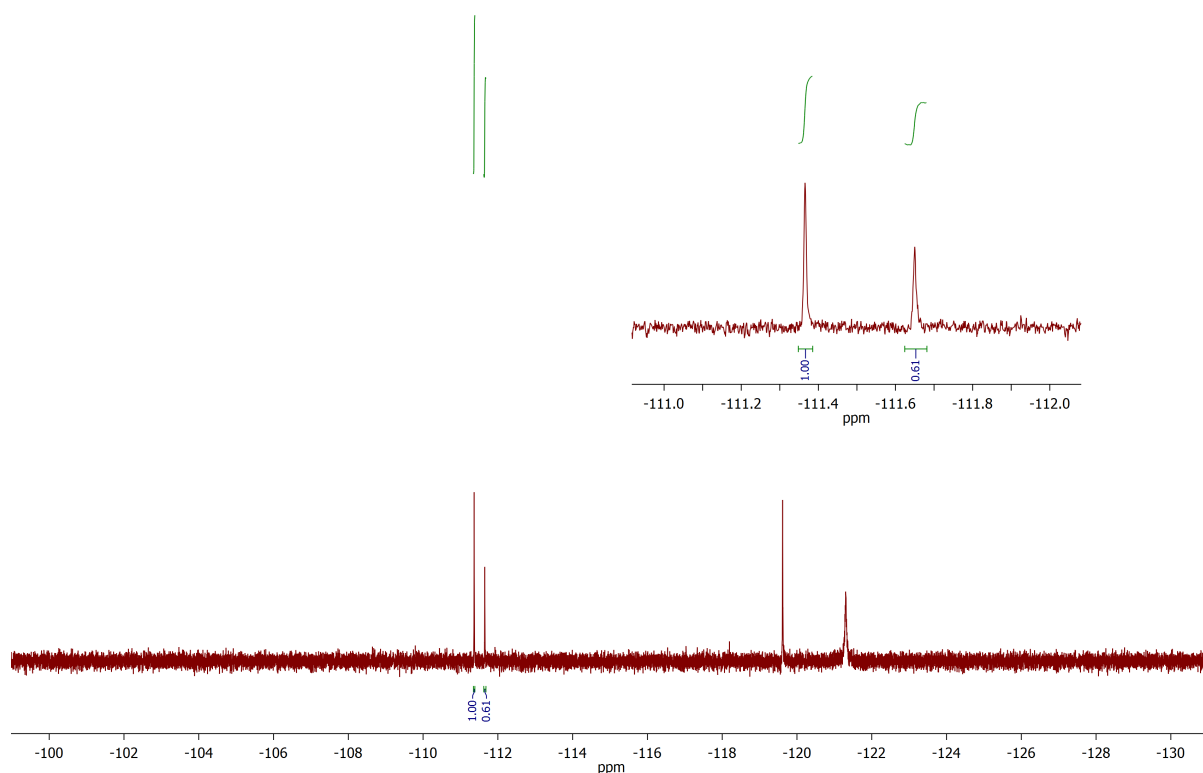

**Spectrum S59.** <sup>19</sup>F NMR (376 MHz, C<sub>6</sub>D<sub>6</sub>, 298 K) of **1b** after 180 min of sonication in THF (15 mL) and H<sub>2</sub>O (0.2 mL). Approximately 38% of the fluorobenzene species formed is deuterated.

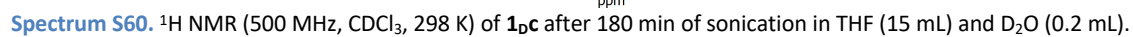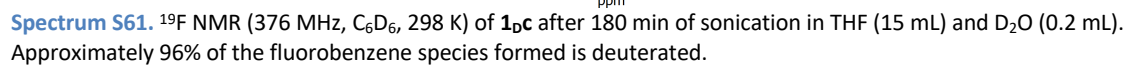

## 7 Calculations

### 7.1 CoGEF

CoGEF calculations were performed on Spartan '14 following Beyer's method.<sup>3</sup> The structure of the mechanophore was built in Spartan '14 and minimized using molecular mechanics (MMFF). The distance between the terminal methylene groups was constrained and increased by increments of 0.2 Å. At each step, the energy was minimized by molecular mechanics (MMFF) then DFT (B3LYP/6-31G\*/SM8=THF). The relative energy of each intermediate was determined by setting the energy of the initial state at 0 kJ/mol.  $F_{\max}$  values were determined from the slope of the final 40% of the energy/elongation curve (i.e. from 0.6  $E_{\max}$  to  $E_{\max}$ ).

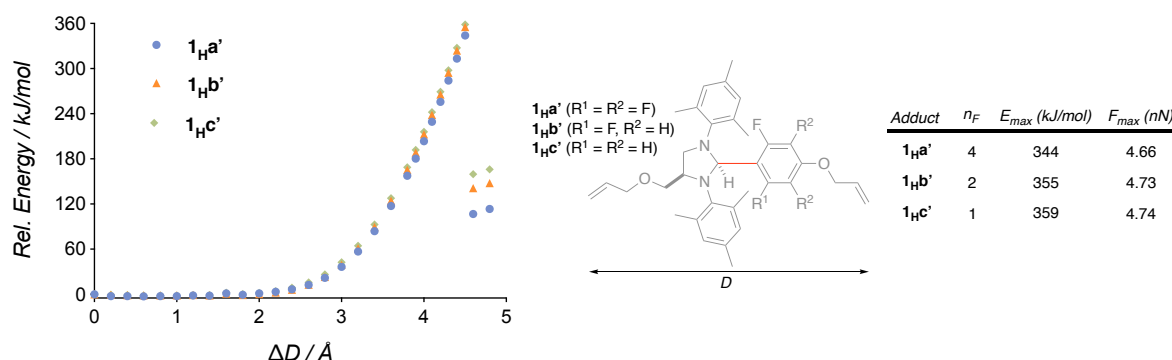

**Figure S12.** Evolution of energy of model mechanophores **1Ha-c'** upon simulated elongation (CoGEF, DFT B3LYP/6-31G\*/SM8=THF).  $F_{\max}$  values determined from the slope of the final 40% of the energy/elongation curve.

### 7.2 Force-modified potential energy surfaces

PES calculations were performed on Spartan '14. The structure of the model mechanophore **R** was built in Spartan '14 and minimized using molecular mechanics (MMFF). The distance between the terminal methyl groups was constrained at 13.839 Å to mimic the  $E_{\max}$  structures found in the CoGEF calculations, and C<sup>1</sup>-C<sup>2</sup> and C<sup>1</sup>-H bond lengths were increased by increments of 0.1 Å from 1.805 Å to 3.405 Å, and 0.99 Å to 2.09 Å respectively. At each step, the energy was minimized by molecular mechanics (MMFF) then DFT (B3LYP/6-31G\*/SM8=THF). The relative energy of each intermediate was determined by setting the energy of the force-free state at 0 kJ/mol.

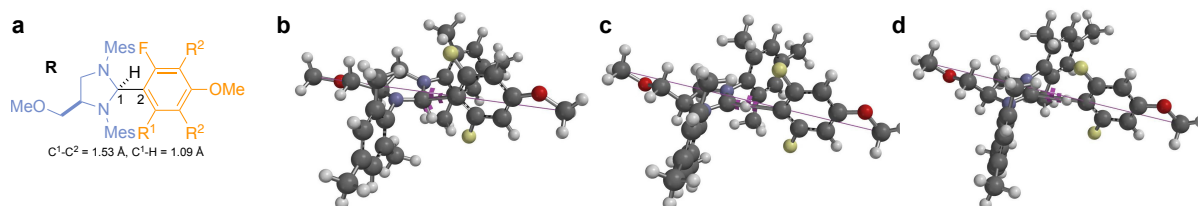

**Figure S13.** Structure of model mechanophore **R** used in the PES calculations (a) and structures of **TS** (b), **P<sub>hetero</sub>** (c), **P<sub>conc</sub>** (d) for **R** where  $n_F = 2$  ( $R^1=F$ ,  $R^2=H$ ) as noted in Figure 2c given as examples.

**Table S6.** Energy values (kJ/mol) calculated for PES of **R** where  $n_F = 4$  ( $R^1=R^2=F$ )

| $\downarrow C^1-C^2/C^1-H \rightarrow (\text{\AA})$ | 0.99       | 1.09       | 1.19       | 1.29       | 1.39       | 1.49       | 1.59       | 1.69       | 1.79       | 1.89       | 1.99       | 2.09       |
|-----------------------------------------------------|------------|------------|------------|------------|------------|------------|------------|------------|------------|------------|------------|------------|
| 1.805                                               | 225.985871 | 206.06041  | 218.643916 | 247.765458 |            |            |            |            |            |            |            |            |
| 1.905                                               | 231.175438 | 212.180195 | 225.734607 | 256.037362 |            |            |            |            |            |            |            |            |
| 2.005                                               | 233.941407 | 216.110568 | 230.906583 | 262.385039 |            |            |            |            |            |            |            |            |
| 2.105                                               | 233.959256 | 216.553753 | 232.425701 | 265.131842 |            |            |            |            |            |            |            |            |
| 2.205                                               | 228.272945 | 212.751504 | 229.976634 | 264.114457 |            |            |            |            |            |            |            |            |
| 2.305                                               | 219.122284 | 204.692263 | 223.240906 | 258.626895 |            |            |            |            |            |            |            |            |
| 2.405                                               | 207.194891 | 193.977063 | 206.024705 | 199.611654 | 198.442257 |            |            |            |            |            |            |            |
| 2.505                                               | 193.06943  | 180.790481 | 162.314299 | 153.71342  | 147.894779 |            |            |            |            |            |            |            |
| 2.605                                               | 177.927635 | 142.473907 | 132.464707 | 125.298136 | 116.160342 | 109.695565 | 111.183438 | 114.97309  | 117.468366 | 118.888498 | 119.520721 | 120.267149 |
| 2.705                                               | 144.3879   | 120.657563 | 113.118434 | 109.568229 | 101.754735 | 89.9032212 | 81.9274739 | 83.79709   | 88.3292334 | 91.6735968 | 94.1213534 | 96.4428208 |
| 2.805                                               | 133.706306 | 105.905654 | 101.389531 | 101.656805 | 98.0937392 | 86.8350614 | 71.796713  | 62.0214435 | 64.0653967 | 68.8107263 | 72.5617834 | 76.0663018 |
| 2.905                                               | 125.386878 | 96.6247674 | 94.1940782 | 99.2016984 | 100.596366 | 93.3914644 | 78.0018206 | 59.4261344 | 48.0955192 | 50.4411402 | 55.0741037 | 59.127616  |
| 3.005                                               | 119.154463 | 91.8203619 | 91.9500646 | 101.007255 | 107.077418 | 104.98752  | 93.0010509 | 73.1614464 | 51.7208104 | 38.8915583 | 41.2605505 | 45.9281671 |
| 3.105                                               | 116.42368  | 90.0436875 | 92.2866546 | 104.601043 | 115.795921 | 119.229812 | 112.037777 | 95.0641694 | 71.3422355 | 48.0650619 | 33.6518457 | 35.4335083 |
| 3.205                                               | 115.811938 | 90.1384679 | 94.8496676 | 109.968096 | 123.764318 | 134.147129 | 132.686035 | 120.533113 | 98.8637977 | 71.1232688 | 44.8007736 | 29.8860881 |
| 3.305                                               | 116.319447 | 92.4221279 | 97.1966042 | 115.318082 | 134.80954  | 148.823423 | 151.243872 | 145.919091 | 128.24185  | 103.006315 | 73.0679766 | 43.3087045 |
| 3.405                                               | 119.826068 | 94.1940782 | 100.43805  | 122.04199  | 145.471181 | 163.959701 | 173.427786 | 171.773459 | 159.198355 | 136.860848 | 107.297959 | 74.817353  |

**Table S7.** Energy values (kJ/mol) calculated for PES of **R** where  $n_F = 2$  ( $R^1=F$ ,  $R^2=H$ )

| $\downarrow C^1-C^2/C^1-H \rightarrow (\text{\AA})$ | 0.99       | 1.09       | 1.19       | 1.29       | 1.39       | 1.49       | 1.59       | 1.69       | 1.79       | 1.89       | 1.99   | 2.09       |
|-----------------------------------------------------|------------|------------|------------|------------|------------|------------|------------|------------|------------|------------|--------|------------|
| 1.805                                               | 241.3805   | 221.537482 | 234.194762 | 263.465436 |            |            |            |            |            |            |        |            |
| 1.905                                               | 248.537618 | 229.566267 | 243.093377 | 273.333647 |            |            |            |            |            |            |        |            |
| 2.005                                               | 253.728498 | 235.743023 | 250.274912 | 281.541751 |            |            |            |            |            |            |        |            |
| 2.105                                               | 255.195891 | 238.064491 | 253.654198 | 286.161584 |            |            |            |            |            |            |        |            |
| 2.205                                               | 251.932129 | 236.429329 | 253.319447 | 287.152189 |            |            |            |            |            |            |        |            |
| 2.305                                               | 245.352884 | 230.523787 | 248.584353 | 283.618524 |            |            |            |            |            |            |        |            |
| 2.405                                               | 235.876136 | 222.18992  | 232.665673 | 222.643082 | 218.753138 |            |            |            |            |            |        |            |
| 2.505                                               | 223.786225 | 211.012108 | 188.987562 | 176.654268 | 167.317455 |            |            |            |            |            |        |            |
| 2.605                                               | 209.894957 | 172.263639 | 159.52208  | 148.744654 | 135.714026 | 125.471422 | 125.951362 | 129.177317 | 131.7209   | 133.23713  | 134.59 | 136.268271 |
| 2.705                                               | 175.17217  | 150.453333 | 140.342261 | 133.466863 | 121.838253 | 106.21389  | 94.6874111 | 96.1495553 | 100.676182 | 104.229798 | 107.15 | 109.949716 |
| 2.805                                               | 164.18103  | 136.495377 | 129.012173 | 126.531598 | 119.107201 | 104.13344  | 85.4157139 | 72.5851503 | 74.6558831 | 79.6543127 | 83.66  | 87.4352499 |
| 2.905                                               | 156.688112 | 127.783437 | 123.313782 | 125.4365   | 123.261274 | 112.189008 | 92.9396145 | 71.0539582 | 56.9263938 | 59.5518953 | 64.46  | 68.9417402 |
| 3.005                                               | 152.437162 | 123.83442  | 122.072971 | 128.425895 | 131.652112 | 125.888875 | 109.819491 | 86.4294199 | 62.0046408 | 46.6331158 | 49.05  | 53.8892146 |
| 3.105                                               | 150.51687  | 125.01222  | 124.878058 | 134.730253 | 142.925231 | 142.910531 | 132.044627 | 111.304999 | 84.3657781 | 56.2920722 | 40.33  | 42.131428  |
| 3.205                                               | 152.335555 | 124.041047 | 127.107107 | 140.37062  | 151.793913 | 158.92425  | 153.798484 | 137.736975 | 112.837242 | 82.6896554 | 54.04  | 37.103592  |
| 3.305                                               | 152.303524 | 126.753978 | 130.607165 | 146.848258 | 164.007222 | 174.80591  | 173.671958 | 165.055587 | 143.854134 | 114.930555 | 81.83  | 51.9975388 |
| 3.405                                               | 155.450713 | 128.695272 | 134.462974 | 153.36948  | 174.440443 | 190.279571 | 196.43532  | 191.723333 | 175.675478 | 149.843166 | 117.38 | 82.2672121 |

**Table S8.** Energy values (kJ/mol) calculated for PES of **R** where  $n_F = 1$  ( $R^1=R^2=H$ )

| $\downarrow C^1-C^2/C^1-H \rightarrow (\text{\AA})$ | 0.99       | 1.09       | 1.19       | 1.29       | 1.39       | 1.49       | 1.59       | 1.69       | 1.79       | 1.89       | 1.99       | 2.09       |
|-----------------------------------------------------|------------|------------|------------|------------|------------|------------|------------|------------|------------|------------|------------|------------|
| 1.805                                               | 248.593277 | 226.114256 | 235.294848 | 260.863823 |            |            |            |            |            |            |            |            |
| 1.905                                               | 256.799546 | 234.682056 | 244.653712 | 270.69974  |            |            |            |            |            |            |            |            |
| 2.005                                               | 263.512954 | 242.208582 | 253.045078 | 279.702061 |            |            |            |            |            |            |            |            |
| 2.105                                               | 266.283909 | 247.040293 | 258.828271 | 286.909589 |            |            |            |            |            |            |            |            |
| 2.205                                               | 266.574814 | 248.50086  | 261.598701 | 290.98253  |            |            |            |            |            |            |            |            |
| 2.305                                               | 263.645542 | 245.981953 | 260.444793 | 290.866745 |            |            |            |            |            |            |            |            |
| 2.405                                               | 257.575382 | 241.508098 | 258.07344  | 243.636067 | 236.251844 |            |            |            |            |            |            |            |
| 2.505                                               | 248.767611 | 234.24701  | 215.521406 | 198.739723 | 185.055083 |            |            |            |            |            |            |            |
| 2.605                                               | 237.37267  | 201.621737 | 185.93095  | 171.337098 | 154.06996  | 140.154013 | 138.795576 | 140.650233 | 141.200537 | 140.877337 | 141.174022 | 142.03676  |
| 2.705                                               | 201.261781 | 179.167918 | 166.544507 | 156.453128 | 141.237295 | 121.575699 | 107.061137 | 106.919098 | 109.958379 | 111.92593  | 113.432705 | 115.157397 |
| 2.805                                               | 190.735883 | 164.000131 | 154.653347 | 149.493185 | 138.842312 | 120.209651 | 98.1184156 | 82.8779025 | 83.5841625 | 87.1842504 | 89.8349573 | 92.1299095 |
| 2.905                                               | 184.043739 | 154.531786 | 148.113747 | 147.732524 | 142.634324 | 128.395178 | 105.998859 | 81.4798247 | 65.1870086 | 66.9804889 | 70.5503838 | 73.4704669 |
| 3.005                                               | 179.161619 | 148.983838 | 145.447812 | 149.685372 | 150.353825 | 141.631383 | 122.832002 | 96.5601803 | 69.9171127 | 53.0469503 | 54.7243838 | 58.4709764 |
| 3.105                                               | 175.37512  | 146.167987 | 144.993863 | 153.474234 | 159.857354 | 157.361289 | 143.715506 | 120.08599  | 90.5023599 | 61.8891157 | 44.5521394 | 46.7402304 |
| 3.205                                               | 173.381576 | 145.414992 | 147.096627 | 159.148468 | 176.452101 | 173.370812 | 165.730076 | 146.798108 | 119.159975 | 86.9650213 | 57.0826095 | 39.0026152 |
| 3.305                                               | 173.102486 | 146.358074 | 149.994656 | 165.251973 | 180.865044 | 189.630807 | 193.716088 | 174.659671 | 150.827728 | 119.729709 | 84.8756469 | 53.6434639 |
| 3.405                                               | 177.744109 | 148.120311 | 153.539084 | 171.697842 | 191.383592 | 205.126257 | 208.972092 | 201.618849 | 183.035022 | 154.99755  | 120.454085 | 84.3983291 |

### 7.3 Zoom on the force-modified potential energy surface of **R** ( $n_F = 1$ )

Calculations were performed on Spartan '18. The structure of the model mechanophore **R** was built in Spartan '18 and minimized using molecular mechanics (MMFF). The distance between the terminal methyl groups was constrained at 13.839Å to mimic the  $E_{max}$  structures found in the CoGEF calculations. An energy profile was built (MMFF) by increasing C<sup>1</sup>-C<sup>2</sup> bond length by increments of 0.025 Å from 2.205 Å to 2.705 Å, and the C<sup>1</sup>-H by increments of 0.01 Å from 1.04 Å to 1.14 Å. The equilibrium geometry of each structure was then recalculated by DFT (B3LYP/6-31G\*). The relative energy of each intermediate was determined by setting the energy of the force-free state at 0 kJ/mol.

**Table S9.** Energy values (kJ/mol) calculated for zoom of PES of **R** where  $n_F = 1$  ( $R^1=R^2=H$ )

| $\downarrow C^1-C^2/C^1-H \rightarrow$ (Å) | 1.04   | 1.05   | 1.06   | 1.07   | 1.08   | 1.09   | 1.10   | 1.11   | 1.12   | 1.13   | 1.14   |
|--------------------------------------------|--------|--------|--------|--------|--------|--------|--------|--------|--------|--------|--------|
| 2.205                                      | 263.60 | 261.94 | 260.70 | 259.83 | 259.33 | 259.21 | 259.38 | 259.79 | 260.54 | 261.54 | 262.75 |
| 2.230                                      | 264.19 | 262.6  | 261.37 | 260.54 | 260.07 | 259.94 | 260.12 | 260.61 | 261.37 | 262.41 | 263.65 |
| 2.255                                      | 263.2  | 261.62 | 260.44 | 259.61 | 259.15 | 260.53 | 259    | 259.5  | 260.24 | 261.27 | 262.51 |
| 2.280                                      | 263.25 | 261.65 | 260.48 | 259.68 | 259.24 | 259.28 | 259.37 | 259.9  | 260.71 | 261.78 | 263.06 |
| 2.305                                      | 263.52 | 261.95 | 260.8  | 260.02 | 259.62 | 259.56 | 259.79 | 260.35 | 261.19 | 262.29 | 263.6  |
| 2.330                                      | 265.79 | 264.27 | 263.19 | 262.44 | 262.06 | 262.03 | 262.32 | 262.92 | 263.82 | 264.92 | 266.27 |
| 2.355                                      | 265.67 | 264.19 | 263.13 | 262.41 | 262.06 | 262.06 | 262.38 | 263.02 | 263.95 | 265.09 | 266.47 |
| 2.380                                      | 265.63 | 264.16 | 263.11 | 262.45 | 262.14 | 262.16 | 262.51 | 263.17 | 264.13 | 265.3  | 266.72 |
| 2.405                                      | 265.45 | 264.01 | 262.99 | 262.36 | 262.08 | 262.13 | 262.52 | 263.21 | 264.2  | 265.4  | 266.85 |
| 2.430                                      | 263.38 | 261.99 | 261.03 | 260.39 | 260.13 | 260.22 | 260.62 | 261.34 | 262.35 | 263.55 | 265.01 |
| 2.455                                      | 263.09 | 261.73 | 260.8  | 260.2  | 259.97 | 260.09 | 260.53 | 261.28 | 262.28 | 263.57 | 265.07 |
| 2.480                                      | 262.75 | 261.42 | 260.52 | 259.94 | 259.75 | 259.9  | 260.37 | 261.16 | 262.23 | 259.88 | 257.23 |
| 2.505                                      | 262.35 | 261.1  | 260.2  | 259.69 | 259.53 | 259.7  | 260.18 | 257.4  | 254.71 | 252.01 | 249.4  |
| 2.530                                      | 261.82 | 260.68 | 259.73 | 259.27 | 258.7  | 255.75 | 252.92 | 250.19 | 247.52 | 244.87 | 242.33 |
| 2.555                                      | 261.37 | 261.59 | 258.23 | 255.03 | 251.99 | 249.11 | 246.29 | 243.61 | 241.02 | 238.45 | 235.97 |
| 2.580                                      | 258.86 | 255.43 | 252.14 | 249.03 | 246.37 | 243.08 | 240.36 | 237.77 | 235.22 | 232.76 | 230.28 |
| 2.605                                      | 253.47 | 249.99 | 246.66 | 243.5  | 240.51 | 237.72 | 235    | 232.43 | 229.98 | 227.53 | 225.17 |
| 2.630                                      | 248.32 | 244.89 | 241.64 | 238.58 | 235.66 | 232.88 | 230.26 | 227.72 | 225.34 | 222.98 | 220.71 |
| 2.655                                      | 244.04 | 240.43 | 237.22 | 234.21 | 231.34 | 228.64 | 226.08 | 223.64 | 221.26 | 218.98 | 216.8  |
| 2.680                                      | 239.86 | 236.5  | 233.33 | 230.36 | 227.72 | 225.08 | 222.57 | 219.94 | 217.94 | 215.77 | 213.59 |
| 2.705                                      | 236.33 | 233.07 | 229.94 | 226.98 | 224.44 | 221.85 | 219.42 | 216.84 | 214.94 | 212.83 | 210.53 |

**Table S10.** C<sup>2</sup>-C<sup>1</sup>-H bond angle measured from the structures calculated for zoom of PES of **R** where  $n_F = 1$  ( $R^1=R^2=H$ )

| $\downarrow C^1-C^2/C^1-H \rightarrow$ (Å) | 1.04 | 1.05 | 1.06 | 1.07 | 1.08 | 1.09 | 1.10 | 1.11 | 1.12 | 1.13 | 1.14 |
|--------------------------------------------|------|------|------|------|------|------|------|------|------|------|------|
| 2.205                                      | 82.4 | 82.4 | 82.5 | 82.4 | 82.4 | 82.5 | 82.6 | 82.6 | 82.6 | 82.6 | 82.7 |
| 2.230                                      | 81.4 | 81.5 | 81.5 | 81.5 | 81.5 | 81.5 | 81.7 | 81.7 | 81.7 | 81.7 | 81.8 |
| 2.255                                      | 80.1 | 80.3 | 80.4 | 80.5 | 80.5 | 80.6 | 80.7 | 80.7 | 80.8 | 80.9 | 81.4 |
| 2.280                                      | 79.4 | 79.4 | 79.5 | 79.5 | 79.4 | 79.5 | 79.7 | 79.7 | 79.7 | 79.7 | 79.9 |
| 2.305                                      | 78.5 | 78.5 | 78.6 | 78.6 | 78.6 | 78.8 | 78.8 | 78.8 | 78.8 | 78.9 | 79.0 |
| 2.330                                      | 77.7 | 77.8 | 78.0 | 78.0 | 78.0 | 78.0 | 78.0 | 78.0 | 78.0 | 78.2 | 78.4 |
| 2.355                                      | 76.7 | 76.8 | 76.9 | 76.9 | 76.9 | 76.9 | 76.9 | 77.0 | 77.0 | 77.1 | 77.3 |
| 2.380                                      | 75.8 | 75.8 | 75.9 | 76.0 | 76.1 | 76.1 | 76.0 | 76.1 | 76.1 | 76.2 | 76.4 |
| 2.405                                      | 74.8 | 74.8 | 74.9 | 75.0 | 75.1 | 75.1 | 75.0 | 75.1 | 75.1 | 75.2 | 75.5 |
| 2.430                                      | 73.5 | 73.7 | 73.9 | 73.9 | 74.0 | 74.0 | 74.0 | 74.0 | 74.0 | 74.3 | 74.6 |
| 2.455                                      | 72.4 | 72.6 | 72.8 | 72.8 | 72.9 | 72.9 | 72.9 | 73.0 | 73.1 | 73.2 | 73.5 |
| 2.480                                      | 71.3 | 71.6 | 71.8 | 71.8 | 71.9 | 71.9 | 71.9 | 71.9 | 72.0 | 7.9  | 7.5  |
| 2.505                                      | 69.9 | 70.4 | 70.5 | 70.7 | 70.7 | 70.7 | 9.3  | 8.9  | 8.5  | 7.8  | 7.4  |
| 2.530                                      | 68.0 | 68.2 | 68.5 | 68.8 | 10.2 | 9.9  | 9.3  | 8.8  | 8.2  | 7.6  | 7.3  |
| 2.555                                      | 66.7 | 66.8 | 11.6 | 11.1 | 10.3 | 9.4  | 9.0  | 8.6  | 8.2  | 7.6  | 7.2  |
| 2.580                                      | 14.4 | 12.9 | 11.8 | 10.9 | 10.9 | 9.6  | 9.3  | 8.8  | 8.2  | 7.7  | 7.2  |
| 2.605                                      | 13.3 | 11.9 | 11.3 | 10.9 | 10.0 | 9.1  | 8.7  | 8.4  | 8.1  | 7.4  | 7.0  |
| 2.630                                      | 13.7 | 12.6 | 11.6 | 10.7 | 10.0 | 9.4  | 8.8  | 8.3  | 7.8  | 7.4  | 7.0  |
| 2.655                                      | 12.8 | 12.4 | 11.6 | 10.6 | 10.0 | 9.4  | 8.8  | 8.4  | 7.8  | 7.3  | 6.8  |
| 2.680                                      | 13.6 | 12.4 | 11.4 | 10.6 | 9.9  | 9.2  | 8.6  | 8.3  | 7.6  | 7.1  | 6.6  |
| 2.705                                      | 13.7 | 11.5 | 11.3 | 10.5 | 9.8  | 9.2  | 8.6  | 8.4  | 7.5  | 7.1  | 6.8  |

Force free

104.7

## 7.4 Vibration of the C-X bond along the heterolytic pathway

Calculations were performed on Spartan '18. The structure of the model mechanophore **R** was built in Spartan '18 and minimized using molecular mechanics (MMFF). The distance between the terminal methyl groups was constrained at 13.839 Å to mimic the  $E_{max}$  structures found in the CoGEF calculations. An energy profile was built (MMFF) by increasing C<sup>1</sup>-C<sup>2</sup> bond length by increments of 0.1 Å from 2.205 Å to 3.205 Å, at a fixed C<sup>1</sup>-H bond length of 1.090 Å. The equilibrium geometry and the IR spectrum of each structure was then recalculated by DFT (B3LYP/6-31G\*/SM8=THF). The relative energy of each intermediate was determined by setting the energy of the force-free state at 0 kJ/mol.

**Table S10.** C-H bond vibration calculated for **R** where  $n_F = 1$  ( $R^1=R^2=H$ ) along the heterolytic pathway (C<sup>1</sup>-H = 1.090 Å)

| C <sup>1</sup> -C <sup>2</sup> (Å) | Rel. energy (kJ/mol) | $\bar{\nu}_{C1-H}$ (cm <sup>-1</sup> ) | $\nu_{C1-H}$ (THz) | $\nu_{C1-H}$ (fs) |
|------------------------------------|----------------------|----------------------------------------|--------------------|-------------------|
| 2.205                              | 259.136244           | 2947                                   | 88.3488374         | 11.32             |
| 2.305                              | 259.522457           | 2967                                   | 88.9484223         | 11.24             |
| 2.405                              | 260.231606           | 2979                                   | 89.3081732         | 11.20             |
| 2.505                              | 259.791834           | 2997                                   | 89.8477997         | 11.13             |
| 2.605                              | 237.75127            | 2582                                   | 77.4064127         | 12.92             |
| 2.705                              | 221.529607           | 2612                                   | 78.30579           | 12.77             |
| 2.805                              | 212.632043           | 2645                                   | 79.2951051         | 12.61             |
| 2.905                              | 209.90152            | 2622                                   | 78.6055825         | 12.72             |
| 3.005                              | 209.085775           | 2664                                   | 79.8647108         | 12.52             |
| 3.105                              | 210.951724           | 2716                                   | 81.4236316         | 12.28             |
| 3.205                              | 214.63189            | 2768                                   | 82.9825524         | 12.05             |
| Force free                         | 0                    | 2854                                   | 85.5607675         | 11.68             |

**Table S11.** C-D bond vibration calculated for **R** where  $n_F = 1$  ( $R^1=R^2=H$ ) along the heterolytic pathway (C<sup>1</sup>-D = 1.090 Å)

| C <sup>1</sup> -C <sup>2</sup> (Å) | Rel. energy (kJ/mol) | $\bar{\nu}_{C1-D}$ (cm <sup>-1</sup> ) | $\nu_{C1-D}$ (THz) | $\nu_{C1-D}$ (fs) |
|------------------------------------|----------------------|----------------------------------------|--------------------|-------------------|
| 2.205                              | 259.23               | 2181                                   | 65.3847351         | 15.29             |
| 2.305                              | 259.44               | 2191                                   | 65.6845275         | 15.22             |
| 2.405                              | 260.19               | 2203                                   | 66.0442785         | 15.14             |
| 2.505                              | 259.8                | 2219                                   | 66.5239464         | 15.03             |
| 2.605                              | 237.74               | 1964                                   | 58.8792388         | 16.98             |
| 2.705                              | 221.53               | 1988                                   | 59.5987407         | 16.78             |
| 2.805                              | 213.09               | 2005                                   | 60.1083878         | 16.64             |
| 2.905                              | 210.02               | 2013                                   | 60.3482218         | 16.57             |
| 3.005                              | 209.13               | 2044                                   | 61.2775784         | 16.32             |
| 3.105                              | 211.22               | 2074                                   | 62.1769558         | 16.08             |
| 3.205                              | 215.01               | 2098                                   | 62.8964577         | 15.90             |
| Force free                         | 0                    | 2099                                   | 62.9264369         | 15.8915719        |

**Table S12.** C-H bond vibration calculated for **R** where  $n_F = 2$  ( $R^1=F$ ,  $R^2=H$ ) along the heterolytic pathway (C<sup>1</sup>-H = 1.090 Å)

| C <sup>1</sup> -C <sup>2</sup> (Å) | Rel. energy (kJ/mol) | $\bar{\nu}_{C1-H}$ (cm <sup>-1</sup> ) | $\nu_{C1-H}$ (THz) | $\nu_{C1-H}$ (fs) |
|------------------------------------|----------------------|----------------------------------------|--------------------|-------------------|
| 2.205                              | 244.511935           | 2995                                   | 89.7878412         | 11.14             |
| 2.305                              | 241.332715           | 3009                                   | 90.2075506         | 11.08             |
| 2.405                              | 237.197812           | 3021                                   | 90.5673016         | 11.04             |
| 2.505                              | 231.537492           | 3037                                   | 91.0469695         | 10.98             |
| 2.605                              | 198.416789           | 2577                                   | 77.2565164         | 12.94             |
| 2.705                              | 180.579917           | 2602                                   | 78.0059976         | 12.82             |
| 2.805                              | 170.635303           | 2634                                   | 78.9653334         | 12.66             |
| 2.905                              | 166.130727           | 2689                                   | 80.614192          | 12.40             |
| 3.005                              | 166.126526           | 2735                                   | 81.9932373         | 12.20             |
| 3.105                              | 169.260325           | 2779                                   | 83.3123241         | 12.00             |
| 3.205                              | 174.060006           | 2822                                   | 84.6014316         | 11.82             |
| Force free                         | 0                    | 2809                                   | 84.2144268         | 11.92             |

**Table S13.** C-D bond vibration calculated for **R** where  $n_F = 2$  ( $R^1=F$ ,  $R^2=H$ ) along the heterolytic pathway ( $C^1-D = 1.090$  Å)

| $C^1-C^2$ (Å) | Rel. energy (kJ/mol) | $\bar{\nu}_{C1-D}$ (cm <sup>-1</sup> ) | $\nu_{C1-D}$ (THz) | $\nu_{C1-D}$ (fs) |
|---------------|----------------------|----------------------------------------|--------------------|-------------------|
| 2.205         | 244.511935           | 2215                                   | 66.4040294         | 15.06             |
| 2.305         | 241.332715           | 2226                                   | 66.7338012         | 14.98             |
| 2.405         | 237.197812           | 2238                                   | 67.0935521         | 14.90             |
| 2.505         | 231.537492           | 2252                                   | 67.5132615         | 14.81             |
| 2.605         | 198.416789           | 1977                                   | 59.2689689         | 16.87             |
| 2.705         | 180.579917           | 1998                                   | 59.8985331         | 16.69             |
| 2.805         | 170.635303           | 2022                                   | 60.618035          | 16.50             |
| 2.905         | 166.130727           | 2056                                   | 61.6373294         | 16.22             |
| 3.005         | 166.126526           | 2084                                   | 62.4767482         | 16.00             |
| 3.105         | 169.260325           | 2111                                   | 63.2861879         | 15.80             |
| 3.205         | 174.060006           | 2136                                   | 64.035669          | 15.62             |
| Force free    | 0                    | 2119                                   | 63.5423742         | 15.77             |

**Table S14.** C-H bond vibration calculated for **R** where  $n_F = 4$  ( $R^1=R^2=F$ ) along the heterolytic pathway ( $C^1-H = 1.090$  Å)

| $C^1-C^2$ (Å) | Rel. energy (kJ/mol) | $\bar{\nu}_{C1-H}$ (cm <sup>-1</sup> ) | $\nu_{C1-H}$ (THz) | $\nu_{C1-H}$ (fs) |
|---------------|----------------------|----------------------------------------|--------------------|-------------------|
| 2.205         | 222.407048           | 2998                                   | 89.8777789         | 11.13             |
| 2.305         | 217.592926           | 3005                                   | 90.0876336         | 11.10             |
| 2.405         | 210.869018           | 3021                                   | 90.5673016         | 11.04             |
| 2.505         | 203.183387           | 3042                                   | 91.1968657         | 10.96             |
| 2.605         | 169.128529           | 2578                                   | 77.2864957         | 12.94             |
| 2.705         | 151.074001           | 2604                                   | 78.0659561         | 12.81             |
| 2.805         | 139.97942            | 2655                                   | 79.5948976         | 12.56             |
| 2.905         | 134.544102           | 2709                                   | 81.2137769         | 12.31             |
| 3.005         | 132.723316           | 2757                                   | 82.6527807         | 12.10             |
| 3.105         | 135.432835           | 2798                                   | 83.8819297         | 11.92             |
| 3.205         | 138.987504           | 2839                                   | 85.1110788         | 11.75             |
| Force free    | 0                    | 2941                                   | 88.1689619         | 11.34             |

**Table S15.** C-D bond vibration calculated for **R** where  $n_F = 2$  ( $R^1=F$ ,  $R^2=H$ ) along the heterolytic pathway ( $C^1-D = 1.090$  Å)

| $C^1-C^2$ (Å) | Rel. energy (kJ/mol) | $\bar{\nu}_{C1-D}$ (cm <sup>-1</sup> ) | $\nu_{C1-D}$ (THz) | $\nu_{C1-D}$ (fs) |
|---------------|----------------------|----------------------------------------|--------------------|-------------------|
| 2.205         | 222.407048           | 2216                                   | 66.4340087         | 15.05             |
| 2.305         | 217.592926           | 2225                                   | 66.7038219         | 14.99             |
| 2.405         | 210.869018           | 2239                                   | 67.1235313         | 14.90             |
| 2.505         | 203.183387           | 2257                                   | 67.6631578         | 14.78             |
| 2.605         | 169.128529           | 1981                                   | 59.3888859         | 16.84             |
| 2.705         | 151.074001           | 2003                                   | 60.0484293         | 16.65             |
| 2.805         | 139.97942            | 2036                                   | 61.0377444         | 16.38             |
| 2.905         | 134.544102           | 2069                                   | 62.0270596         | 16.12             |
| 3.005         | 132.723316           | 2098                                   | 62.8964577         | 15.90             |
| 3.105         | 135.432835           | 2121                                   | 63.5859803         | 15.73             |
| 3.205         | 138.987504           | 2147                                   | 64.3654407         | 15.54             |
| Force free    | 0                    | 2163                                   | 64.8451087         | 15.42             |

## 7.5 Amplitude of the C-X bond stretching along the heterolytic pathway for **R** ( $n_F = 1$ )

The amplitude was calculated by treating the C-X bond as a harmonic oscillator with the following equation:  $x = \sqrt{k/2E}$ , where  $x$  is the amplitude,  $k$  the force constant of the oscillator (C-X bond), and  $E$  the thermal energy ( $3.866 \times 10^{-21}$  J at 280 K). The force constant can be calculated with the following equation:  $k_X = m_X \cdot (2\pi \cdot \nu_X)^2$  where  $m_X$  is the mass of X ( $m_H = 1.6726 \times 10^{-27}$  kg,  $m_D = 3.3435 \times 10^{-27}$  kg), and  $\nu_X$  the C-X vibration frequency. We used the average over the pre-VRI range (i.e. from 2.205 Å to 2.505 Å) for  $\nu_X$  ( $\nu_H = 8.91 \times 10^{13}$  Hz,  $\nu_D = 6.59 \times 10^{13}$  Hz). Results are presented in Table S16.

**Table S1.** Parameters for the determination of the C-X bond vibration amplitude for **R** ( $n_F = 1$ )

|         | X = H                       | X = D                       |
|---------|-----------------------------|-----------------------------|
| $m_X$   | $1.6726 \times 10^{-27}$ kg | $3.3435 \times 10^{-27}$ kg |
| $\nu_X$ | $8.91 \times 10^{13}$ Hz    | $6.59 \times 10^{13}$ Hz    |
| $k_X$   | 524 N/m                     | 573 N/m                     |
| $x_X$   | 0.0384 Å                    | 0.0367 Å                    |

## 8 References

- (1) Nixon, R.; De Bo, G. Three Concomitant C–C Dissociation Pathways During the Mechanical Activation of an N-Heterocyclic Carbene Precursor. *Nat. Chem.* **2020**, *12*, 826–831.
- (2) Hickenboth, C. R.; Moore, J. S.; White, S. R.; Sottos, N. R.; Baudry, J.; Wilson, S. R. Biasing Reaction Pathways with Mechanical Force. *Nature* **2007**, *446*, 423–427.
- (3) Beyer, M. The Mechanical Strength of a Covalent Bond Calculated by Density Functional Theory. *J. Chem. Phys.* **2000**, *112*, 7307–7312.
